# Supplementary material for: The BTB-zinc Finger Transcription Factor Abrupt Acts as an Epithelial Oncogene in Drosophila melanogaster through Maintaining a Progenitor-like Cell State
Source: PubMed Central journal article supplement (PMC3715428; doi:10.1371/journal.pgen.1003627), 2013-07-18

*al*

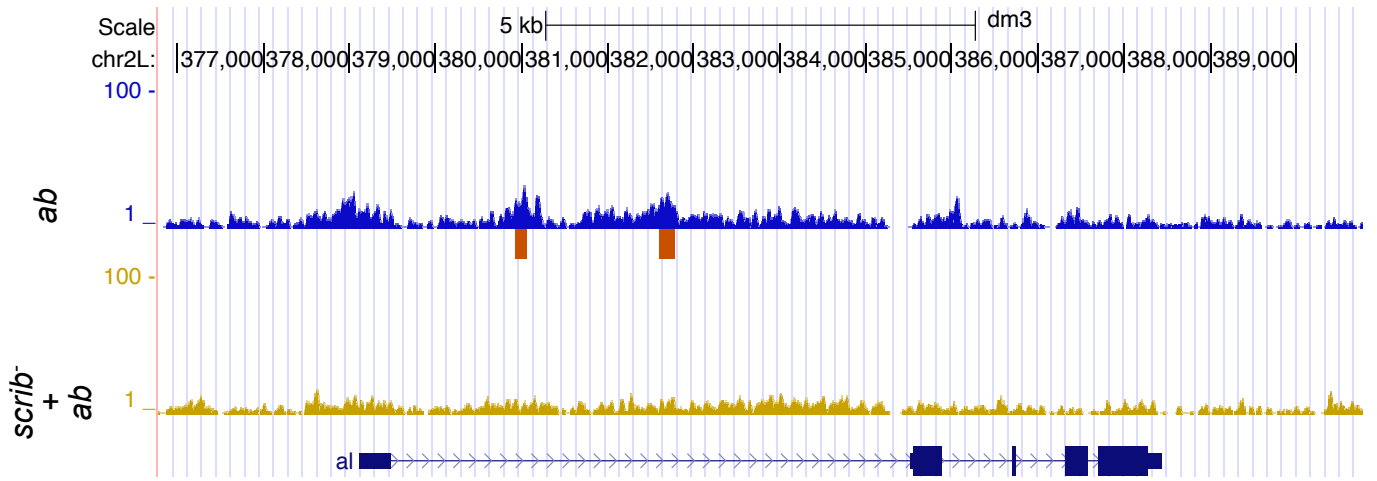

*Antp*

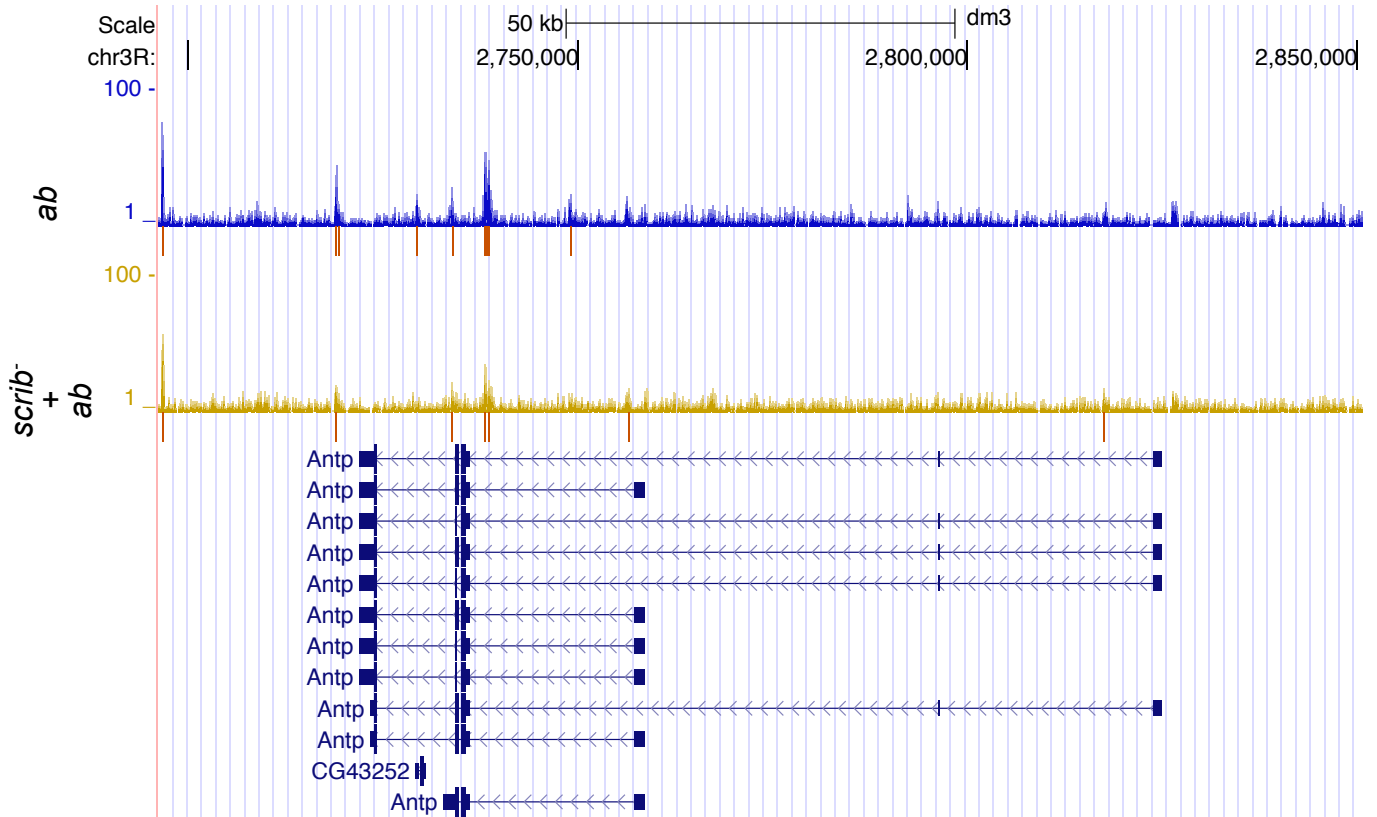

*bab1*

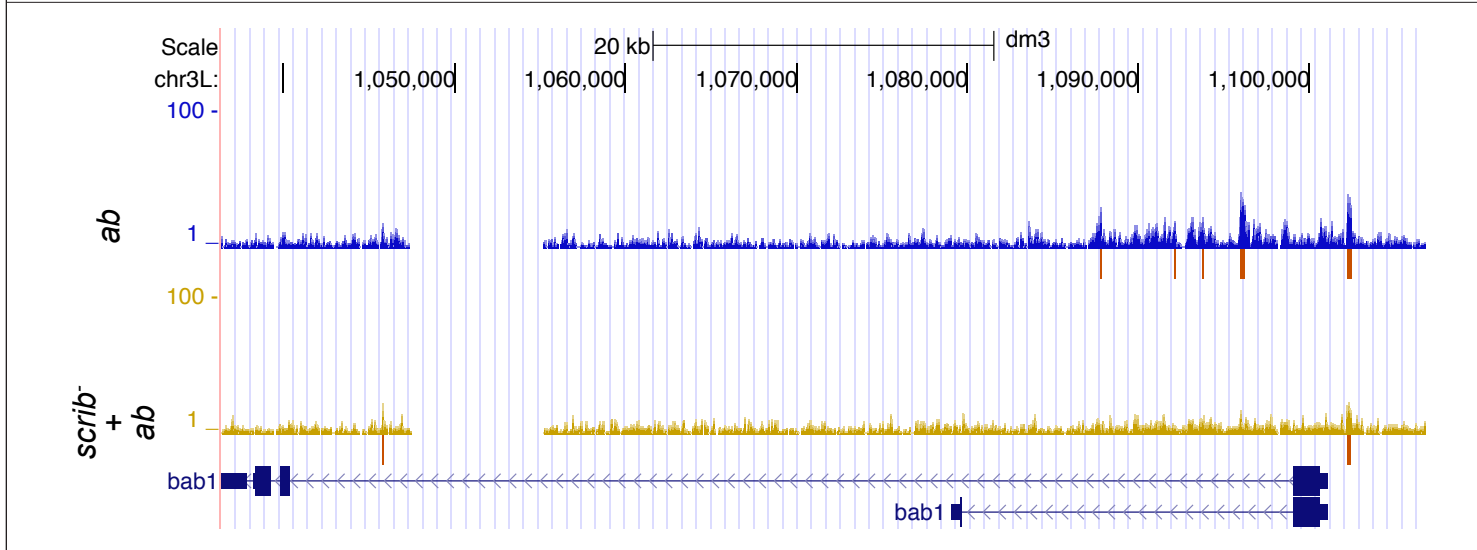

*bab2*

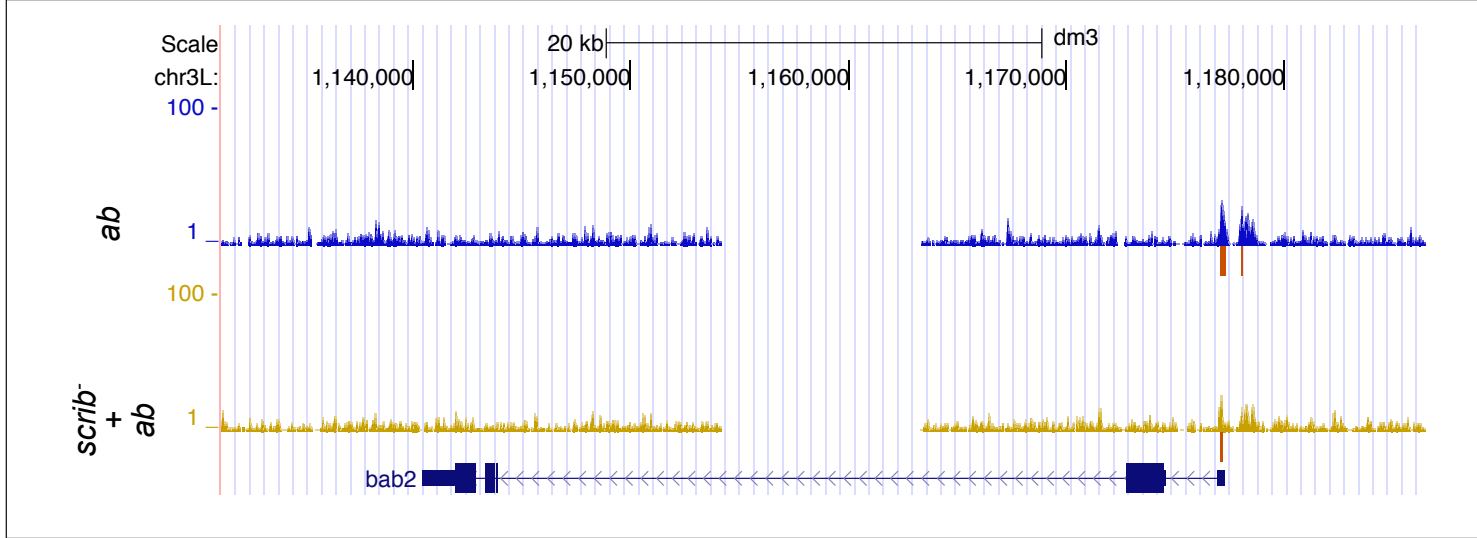

*Blimp-1*

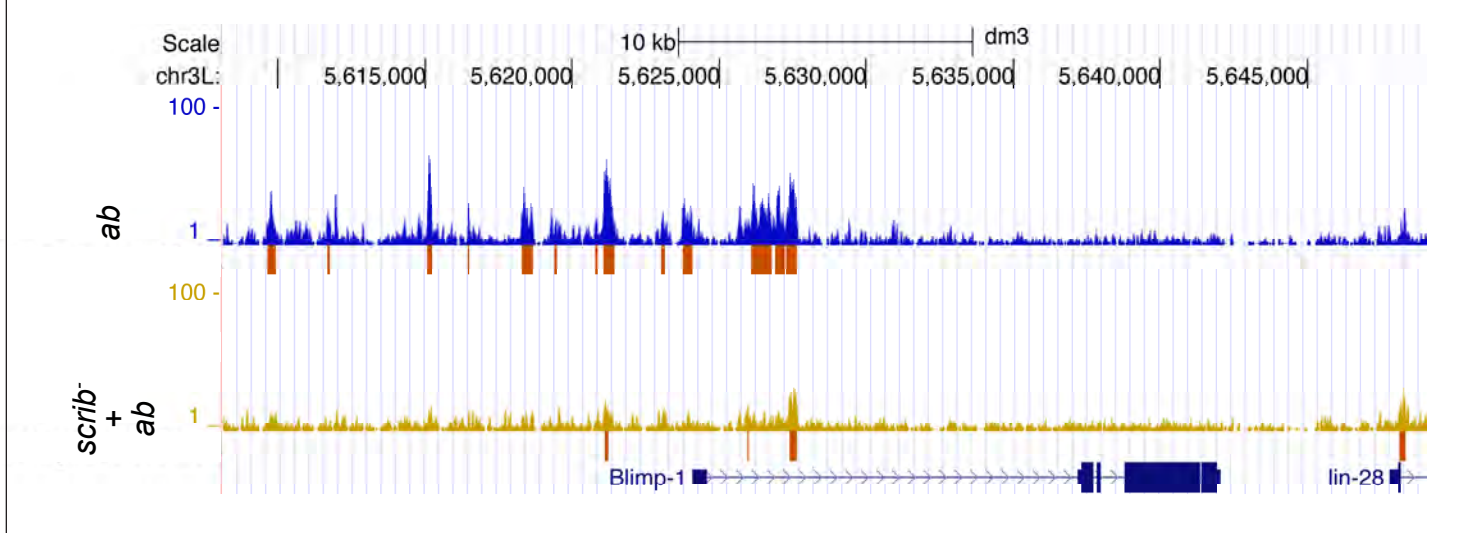

*bowl*

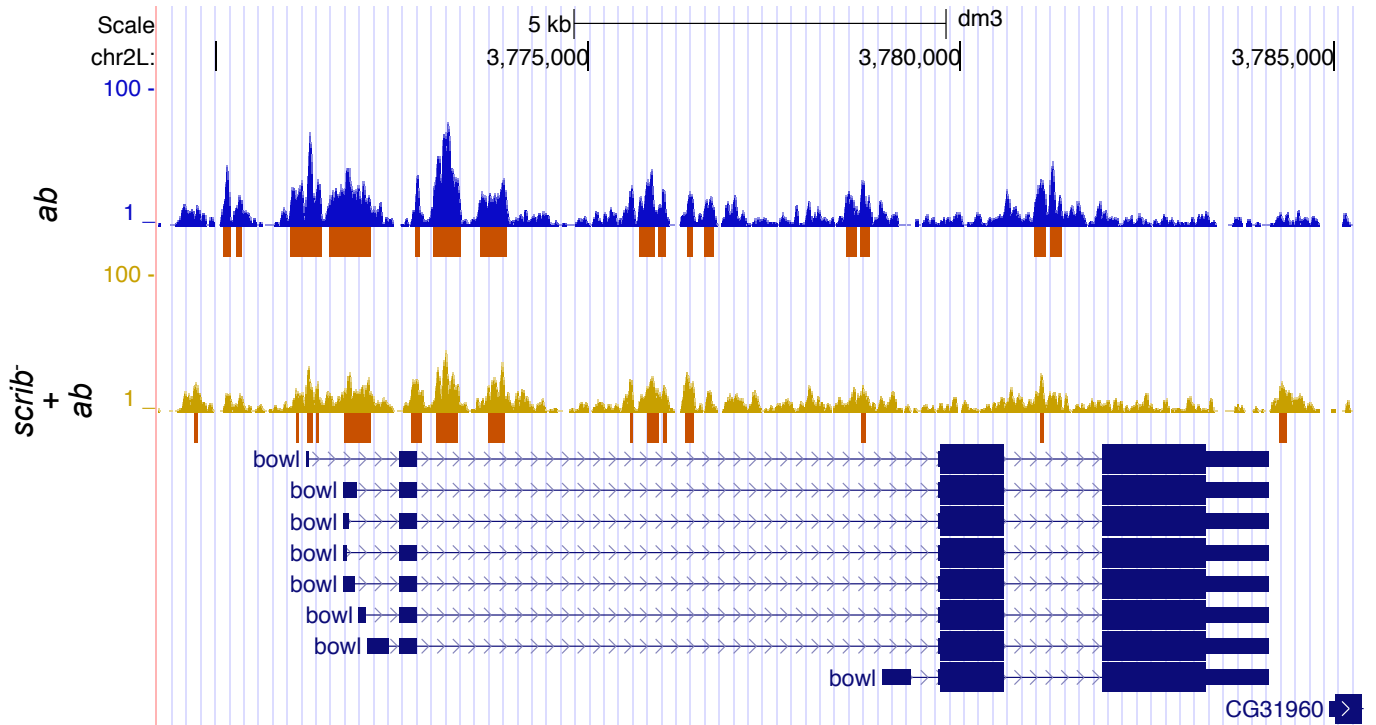

*br*

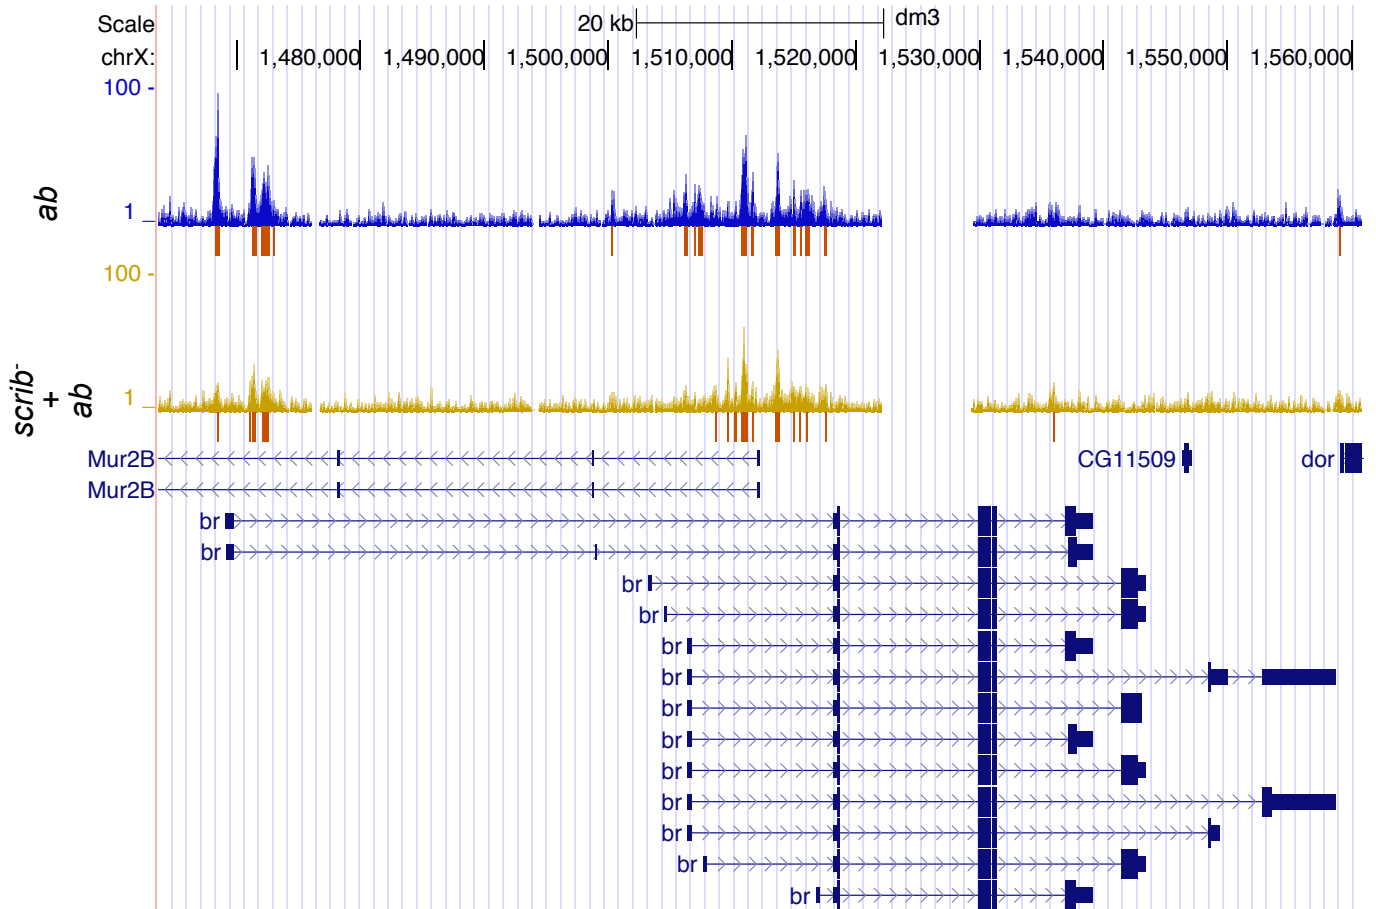

# Buffy

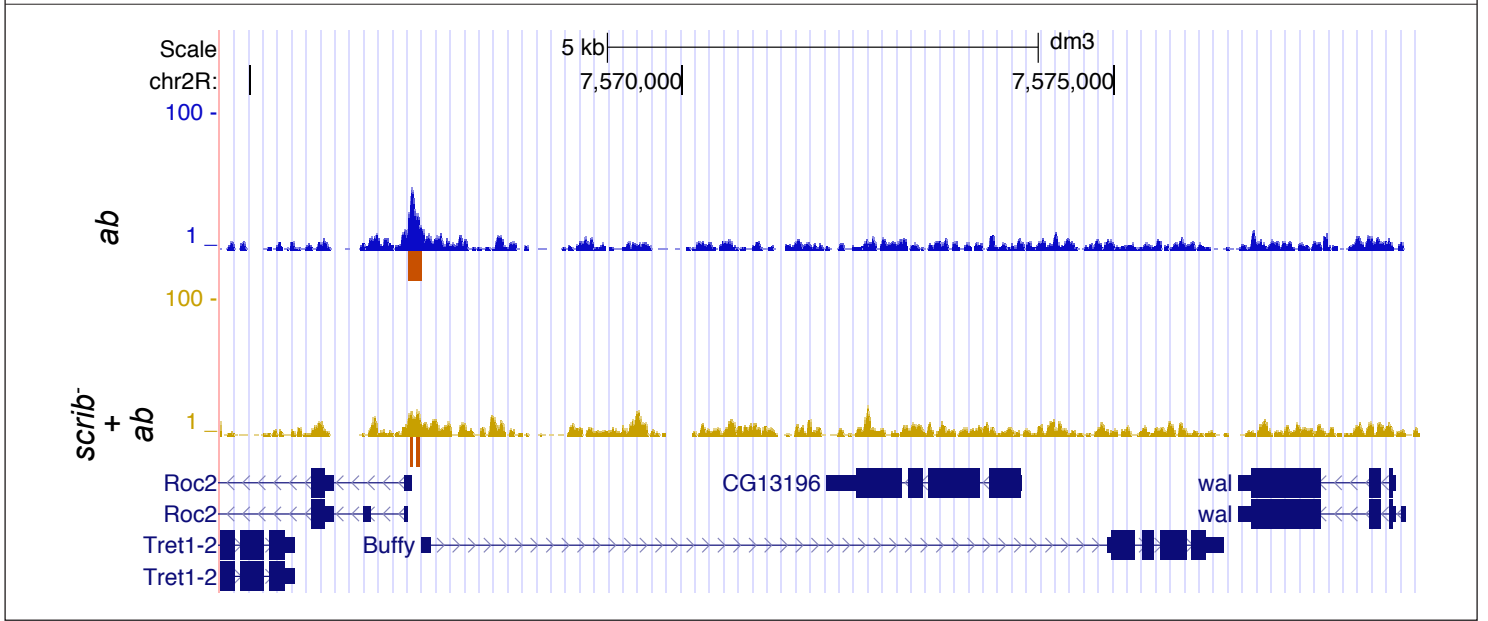

# cdc2c

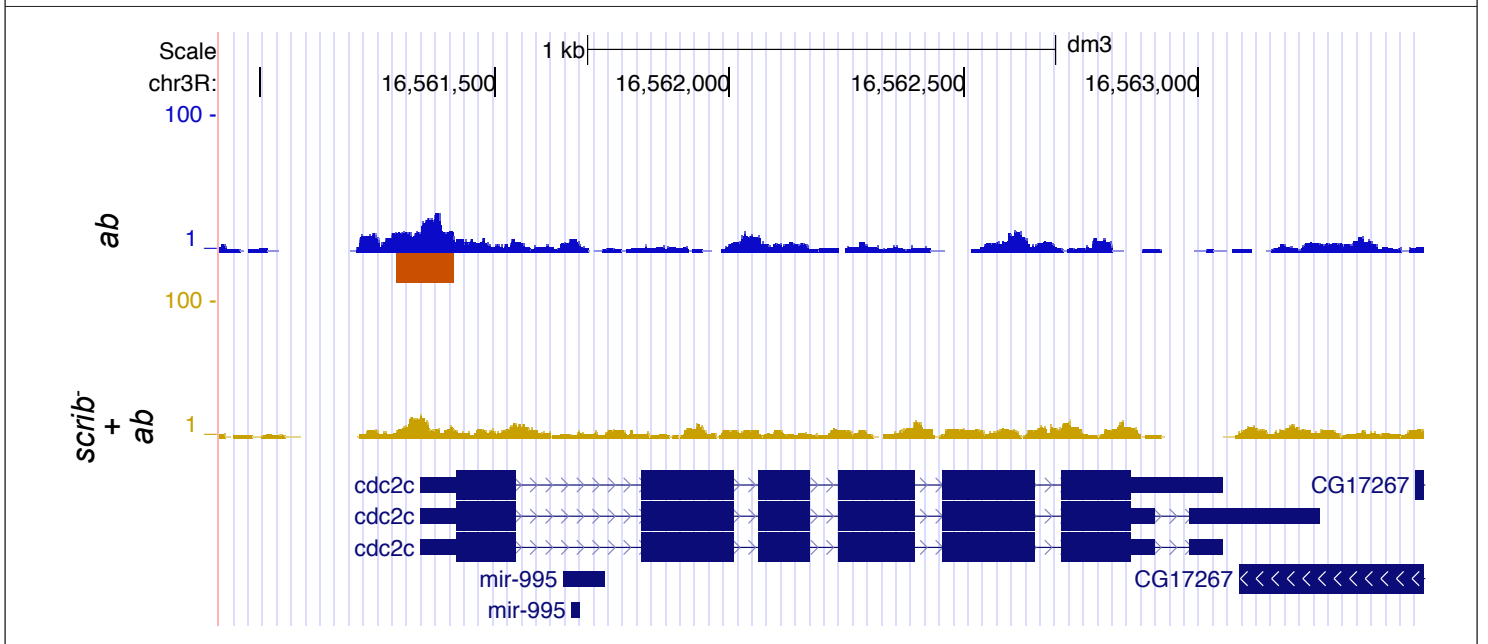

# Cdk4

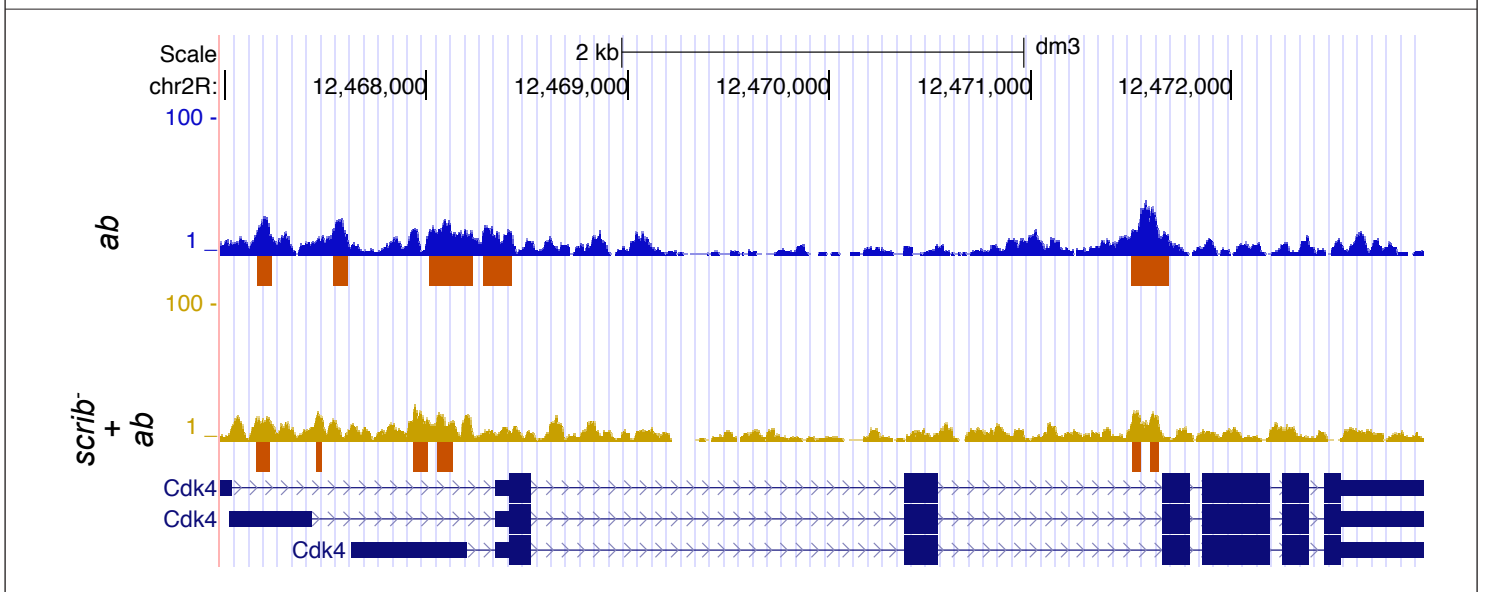

*chinmo*

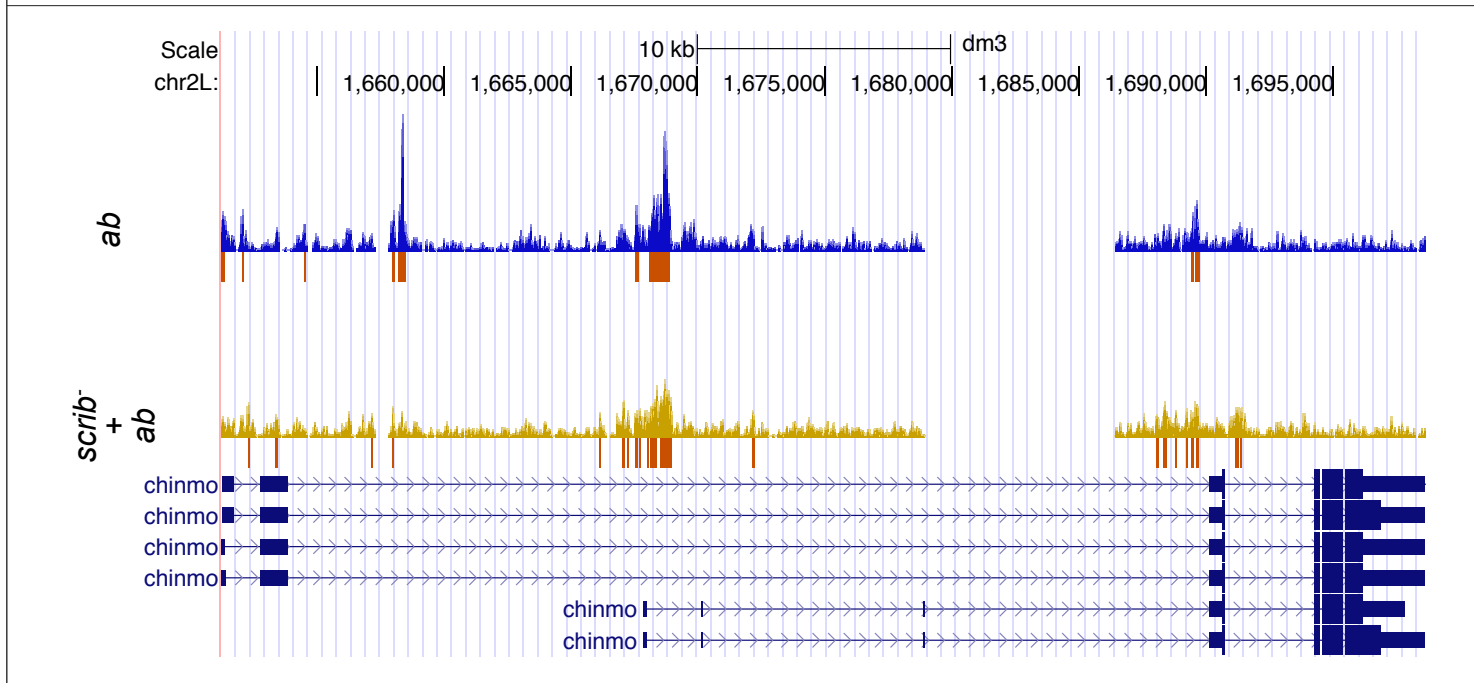

*ct*

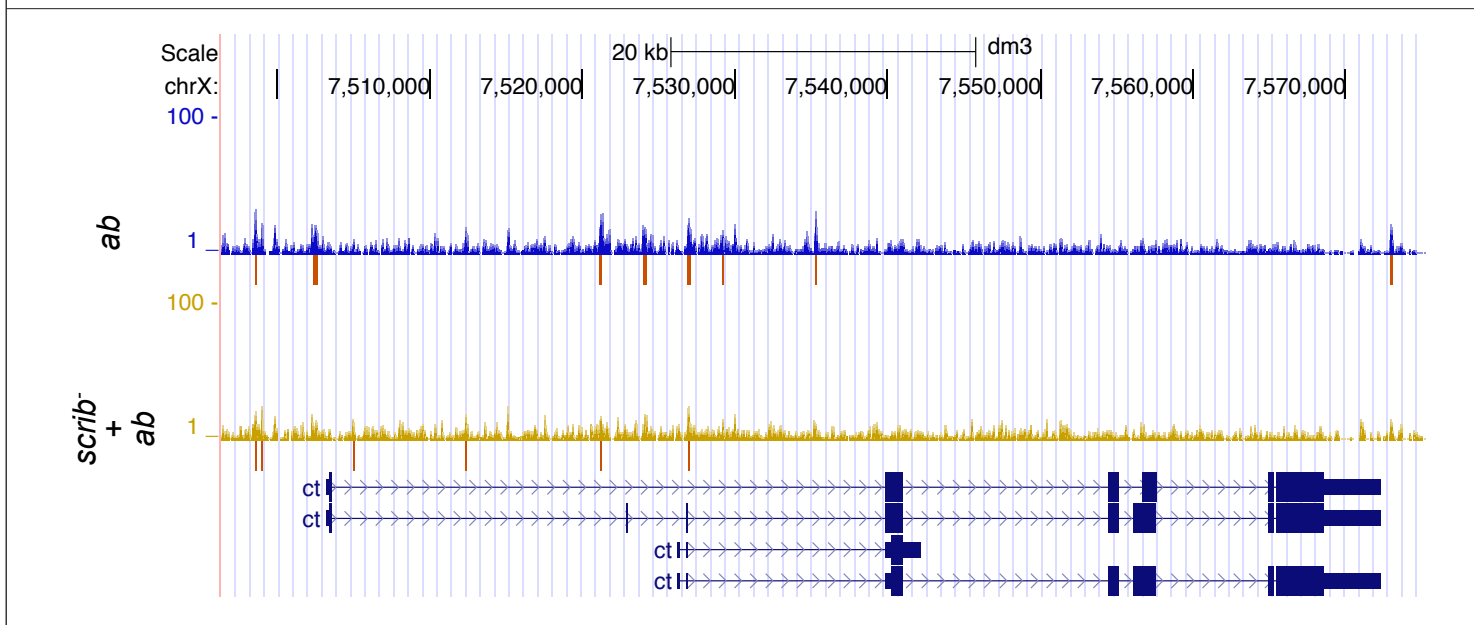

*da*

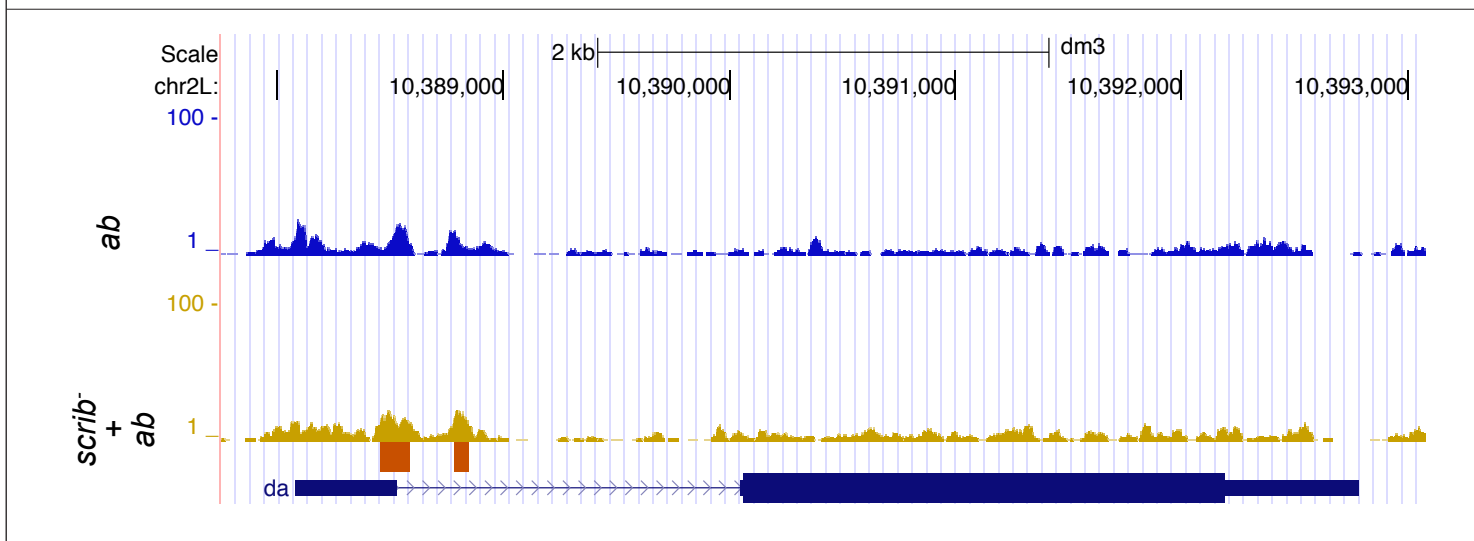

*dac*

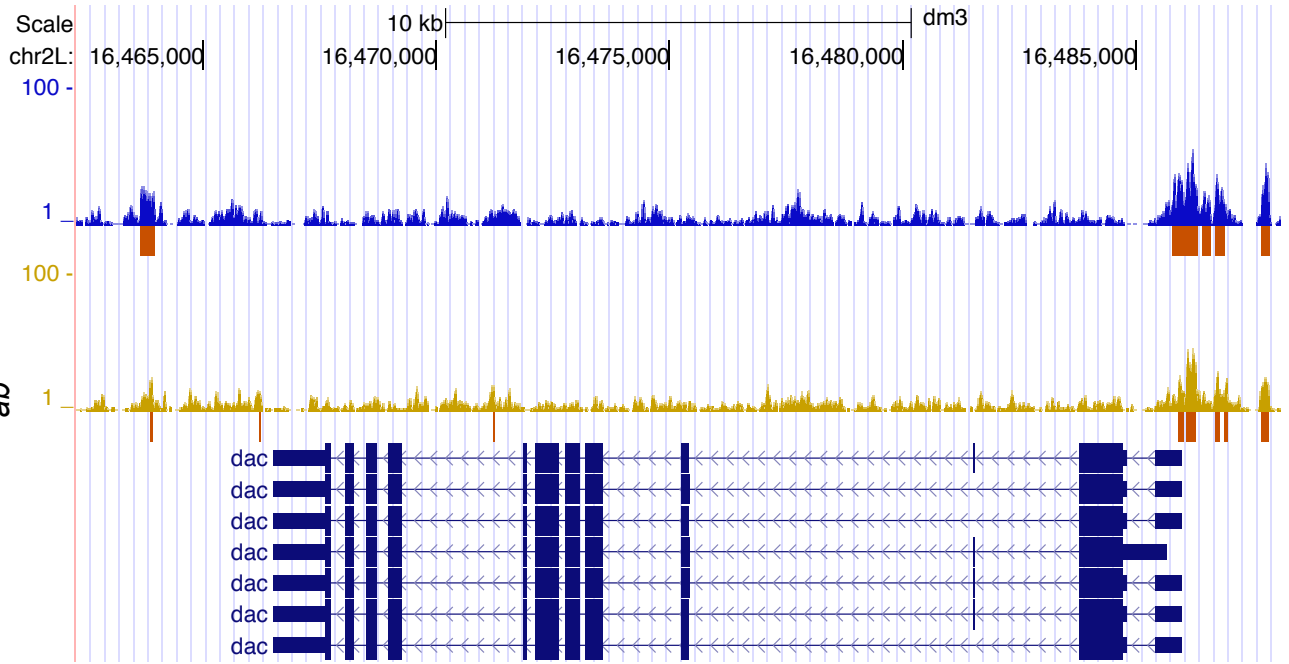

*dan*

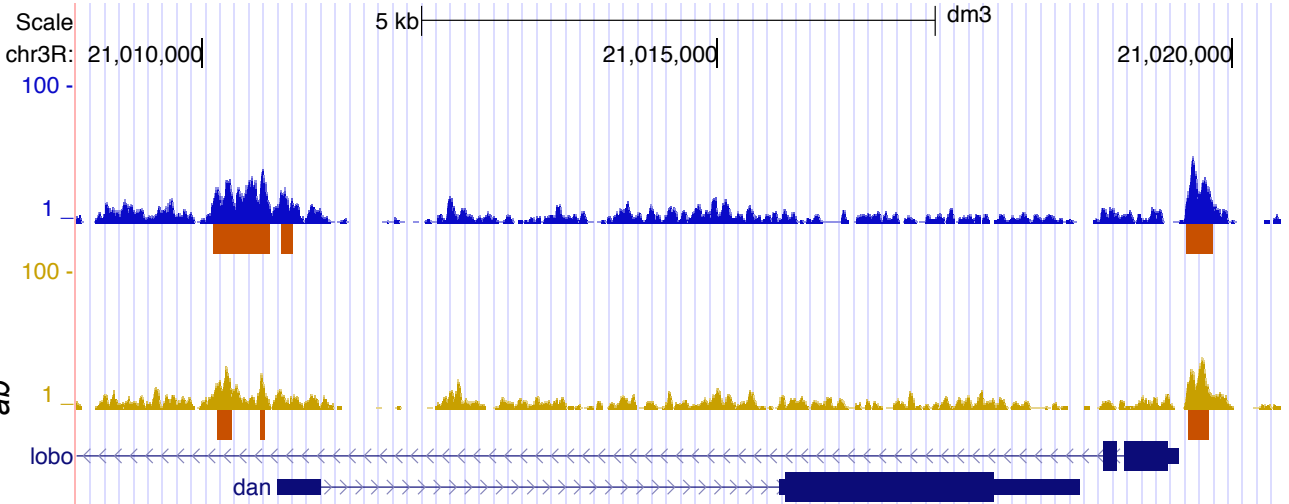

*danr*

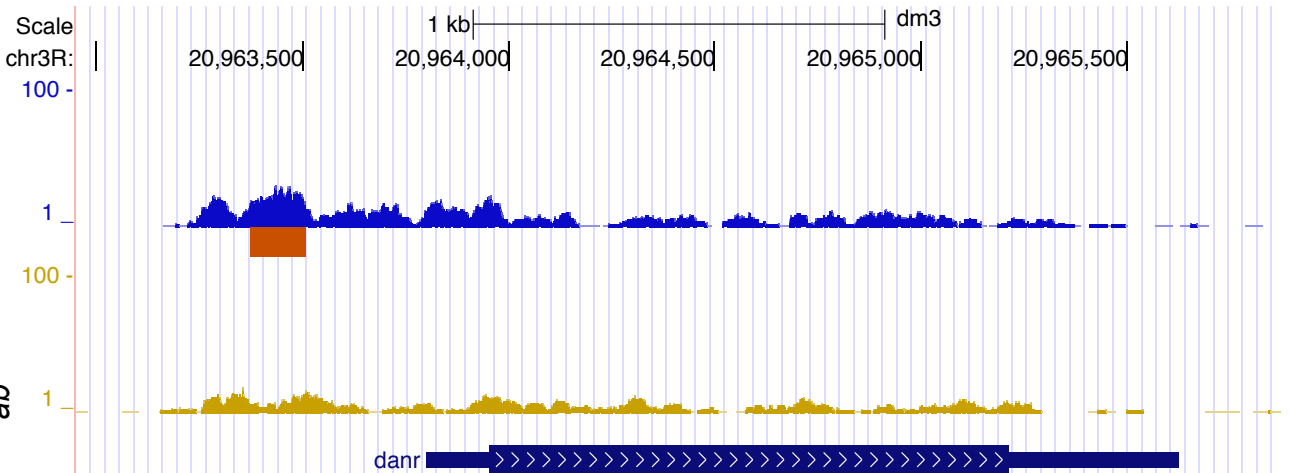

*DI*

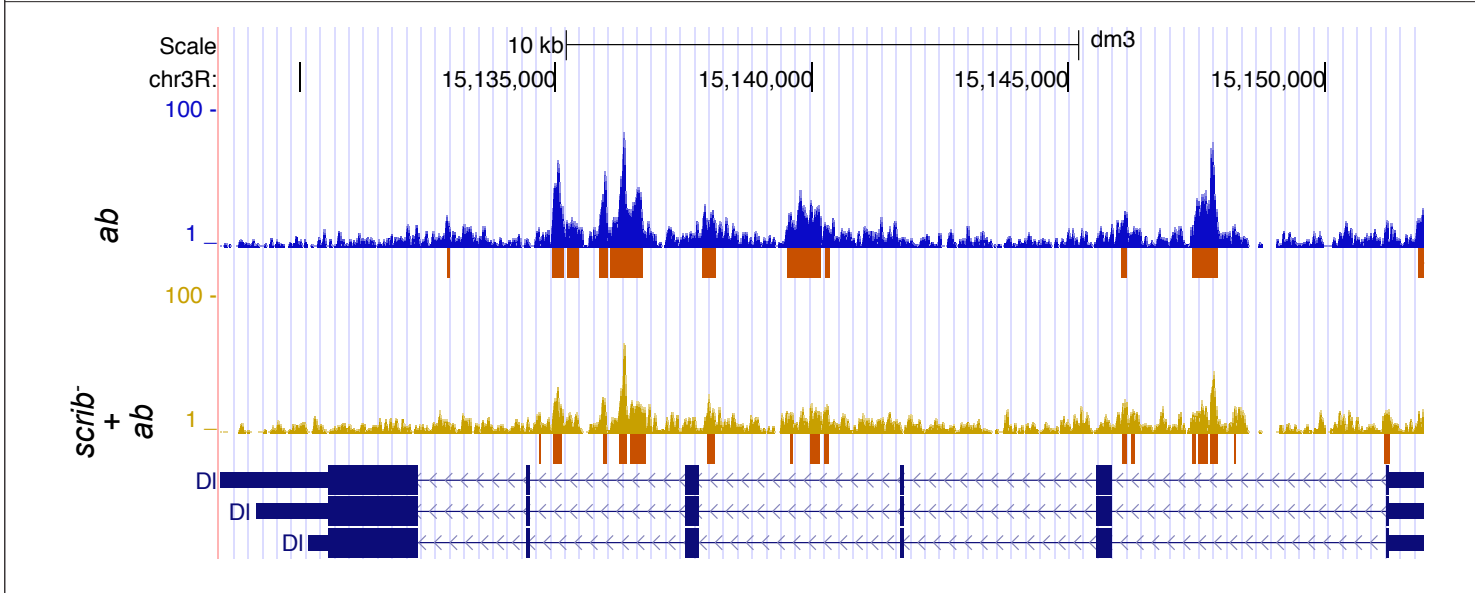

*dm*

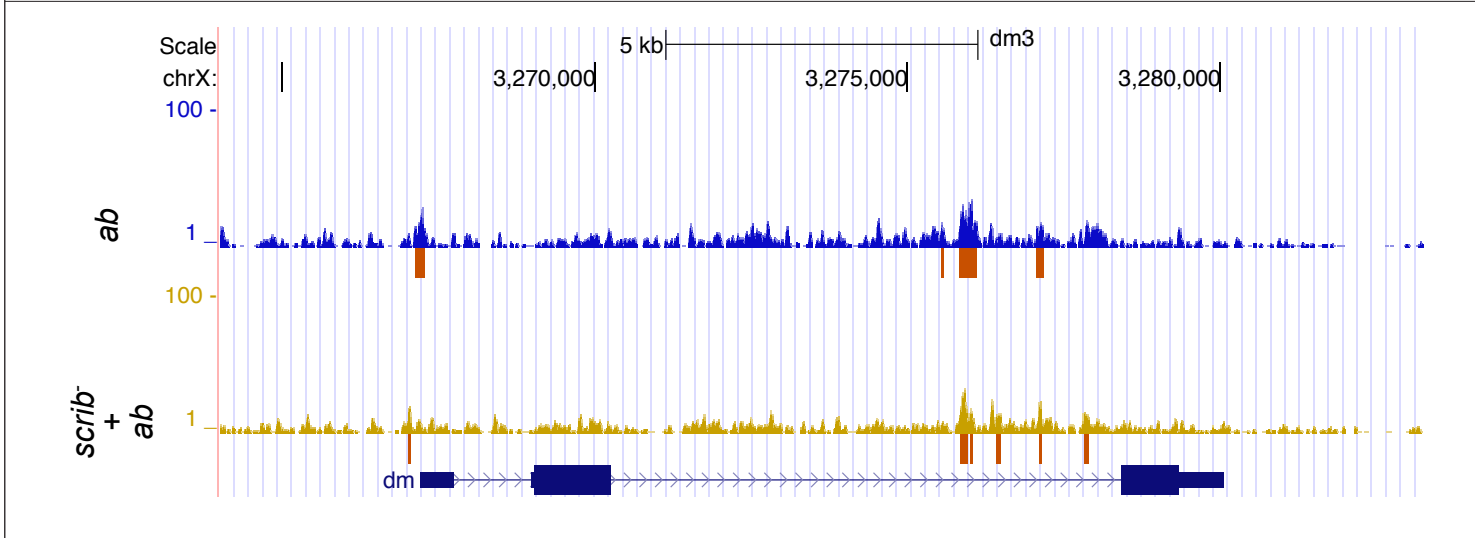

*dom*

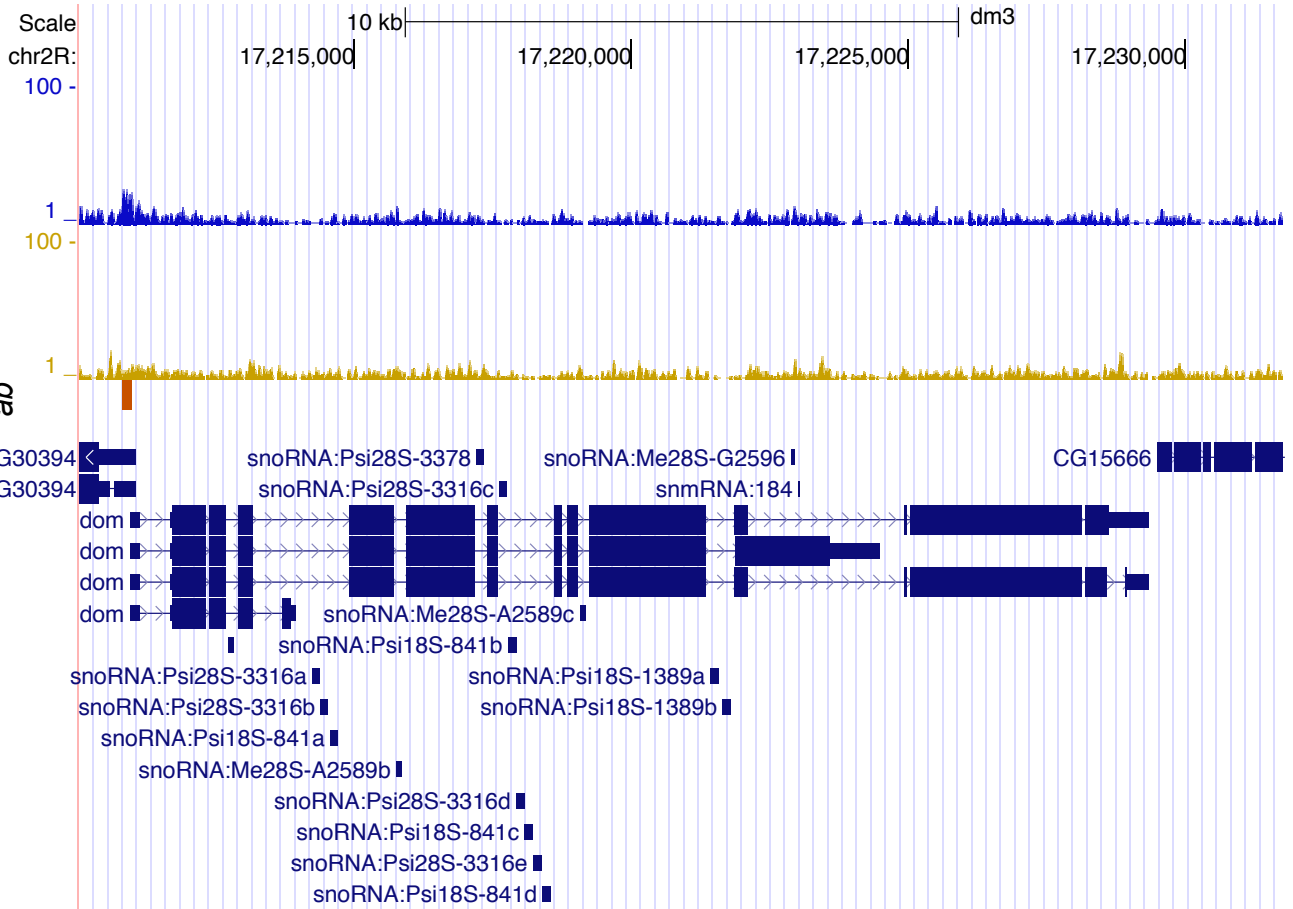

*drm*

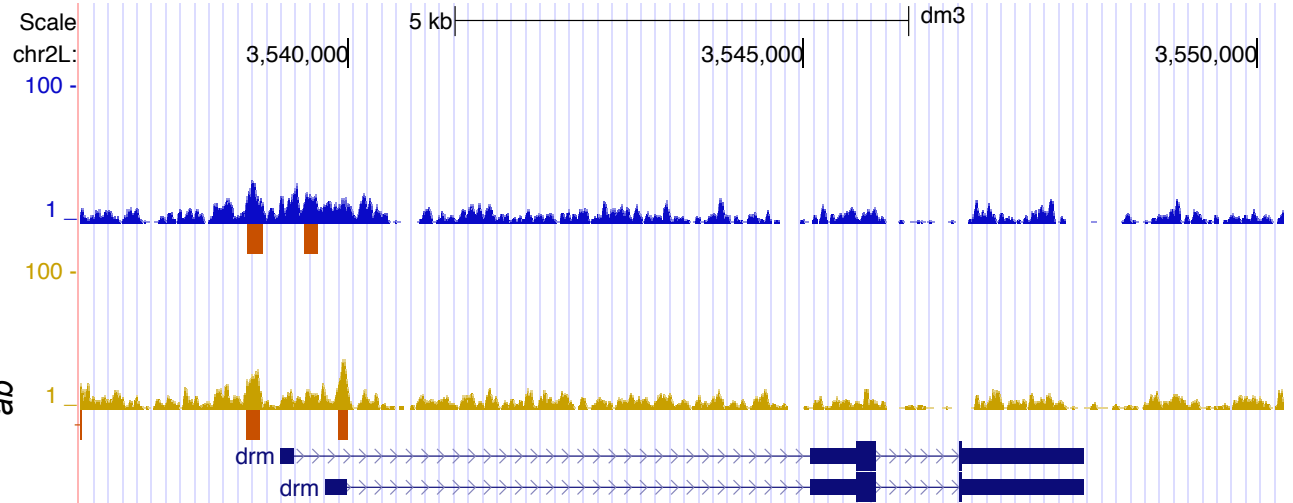





### Eip63F

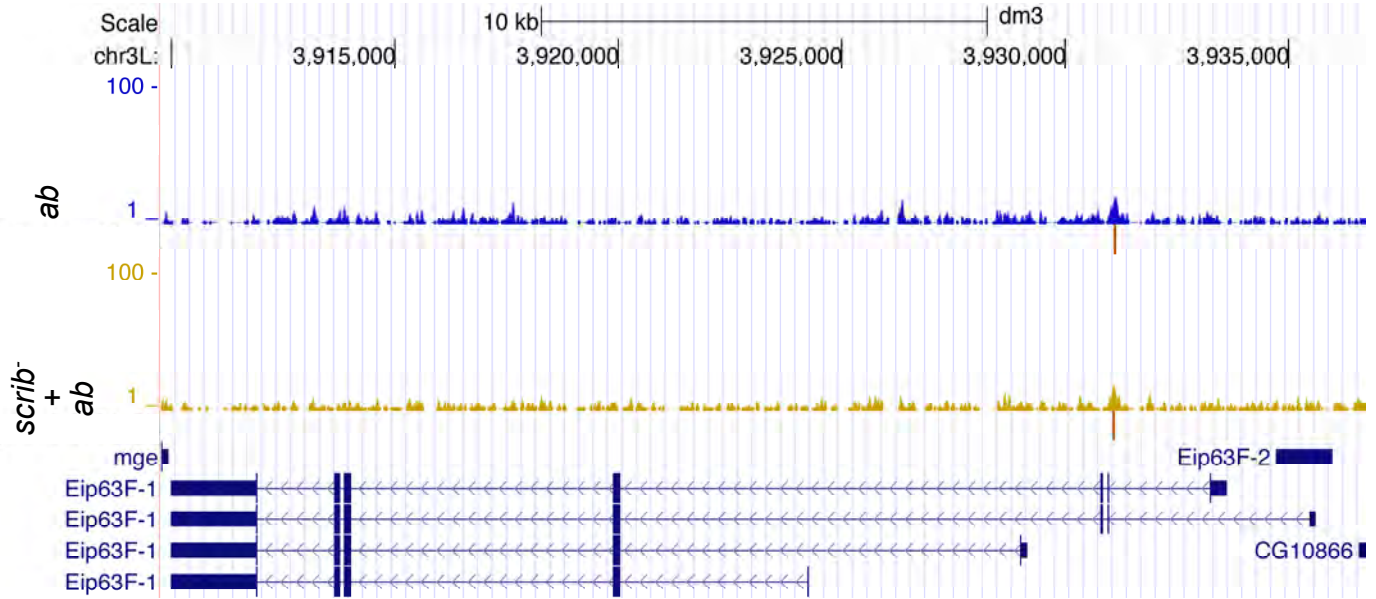

### Eip75B

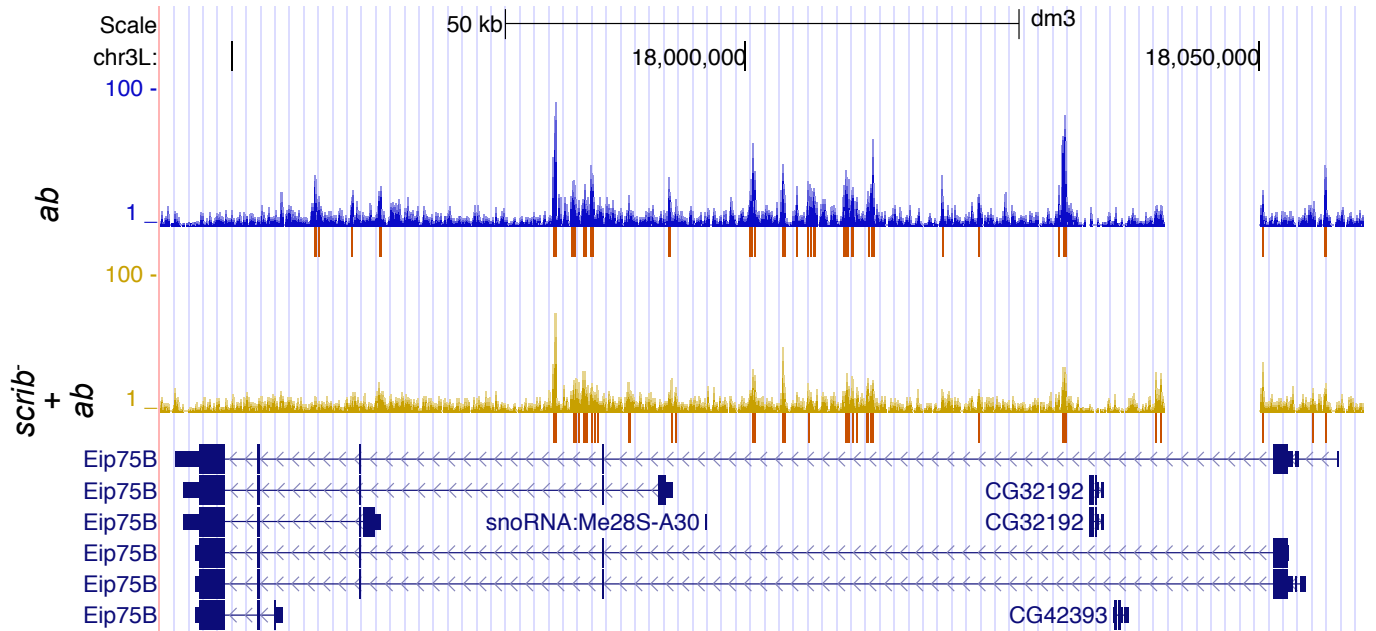

### eIB

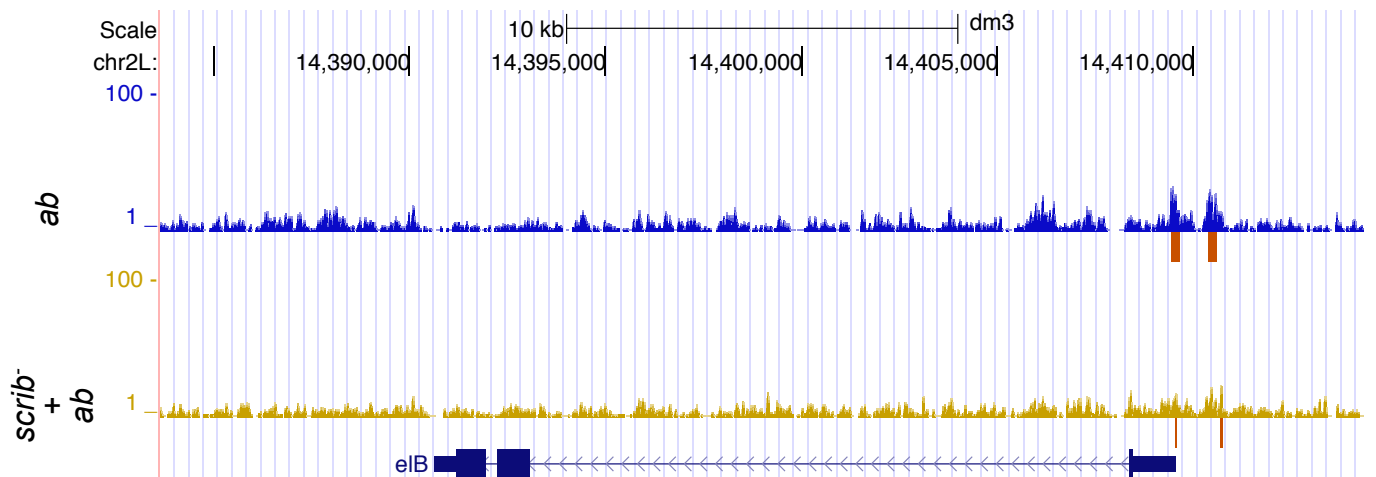

*E(var)3-9*

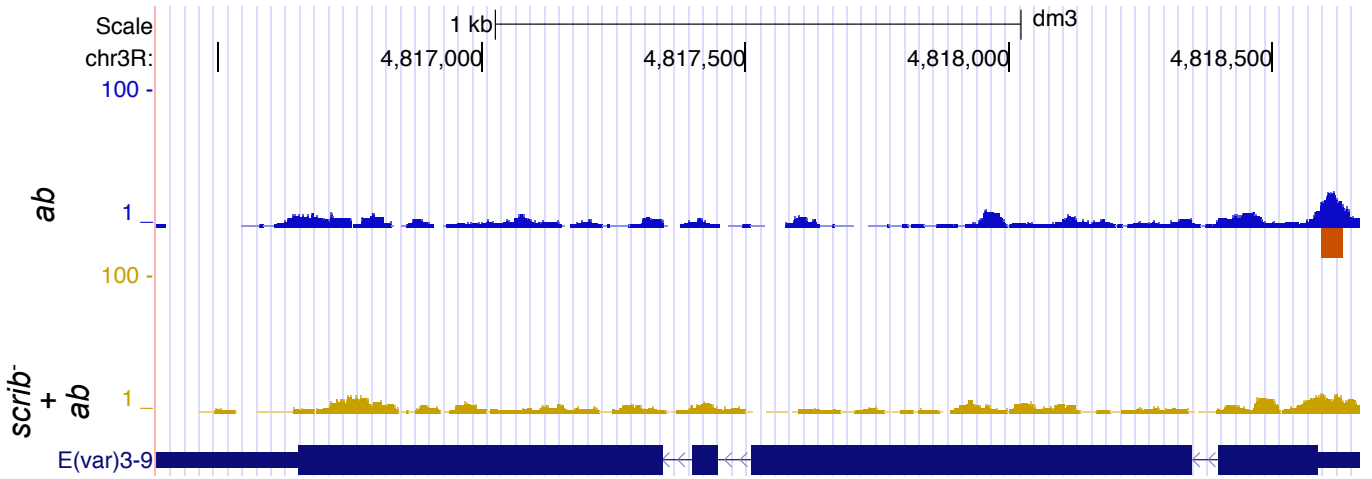

*ex*

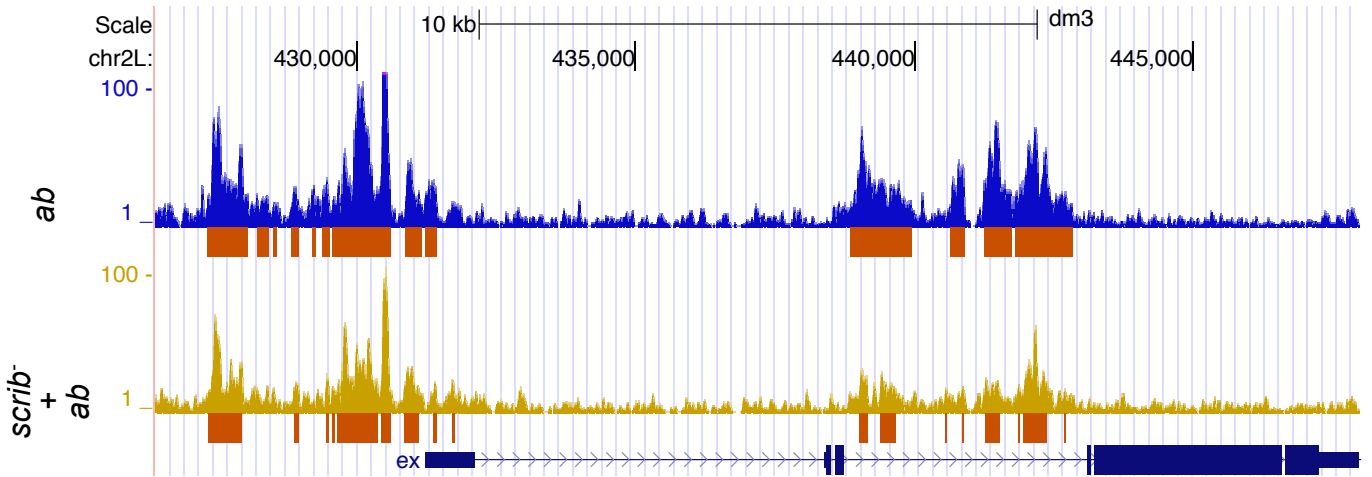

*eya*

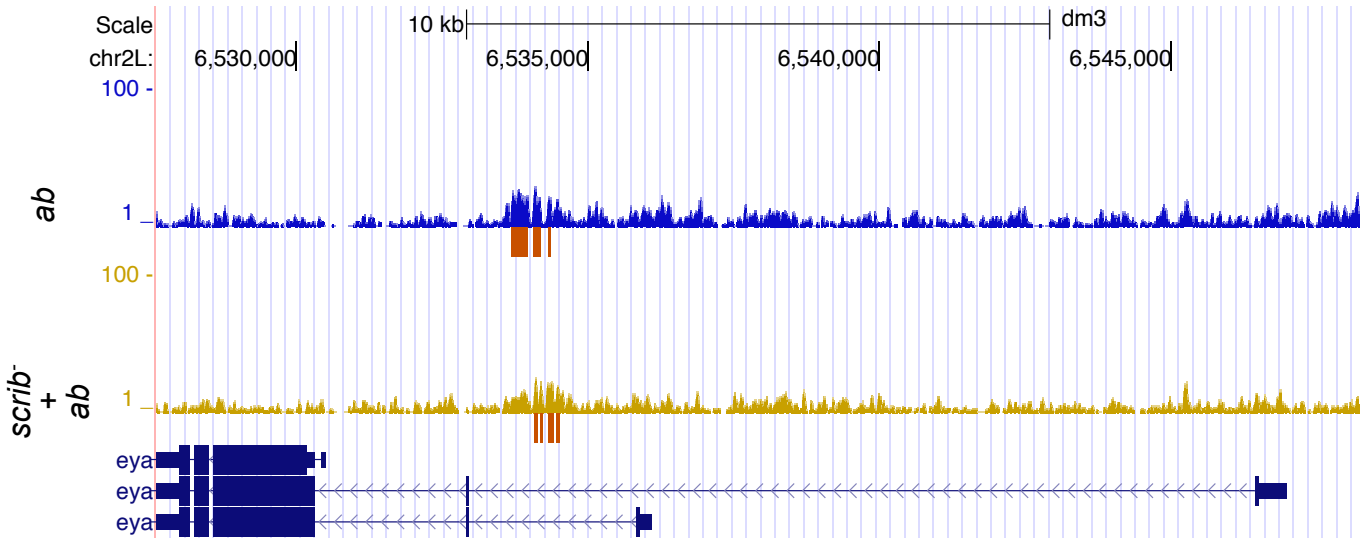

# eyg

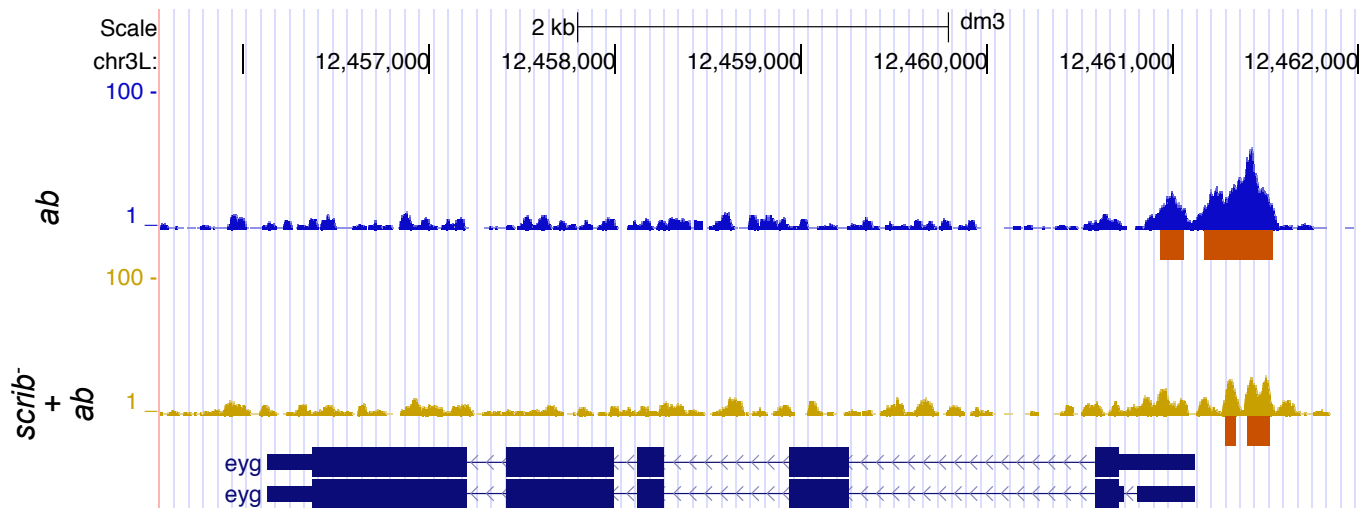

# fru

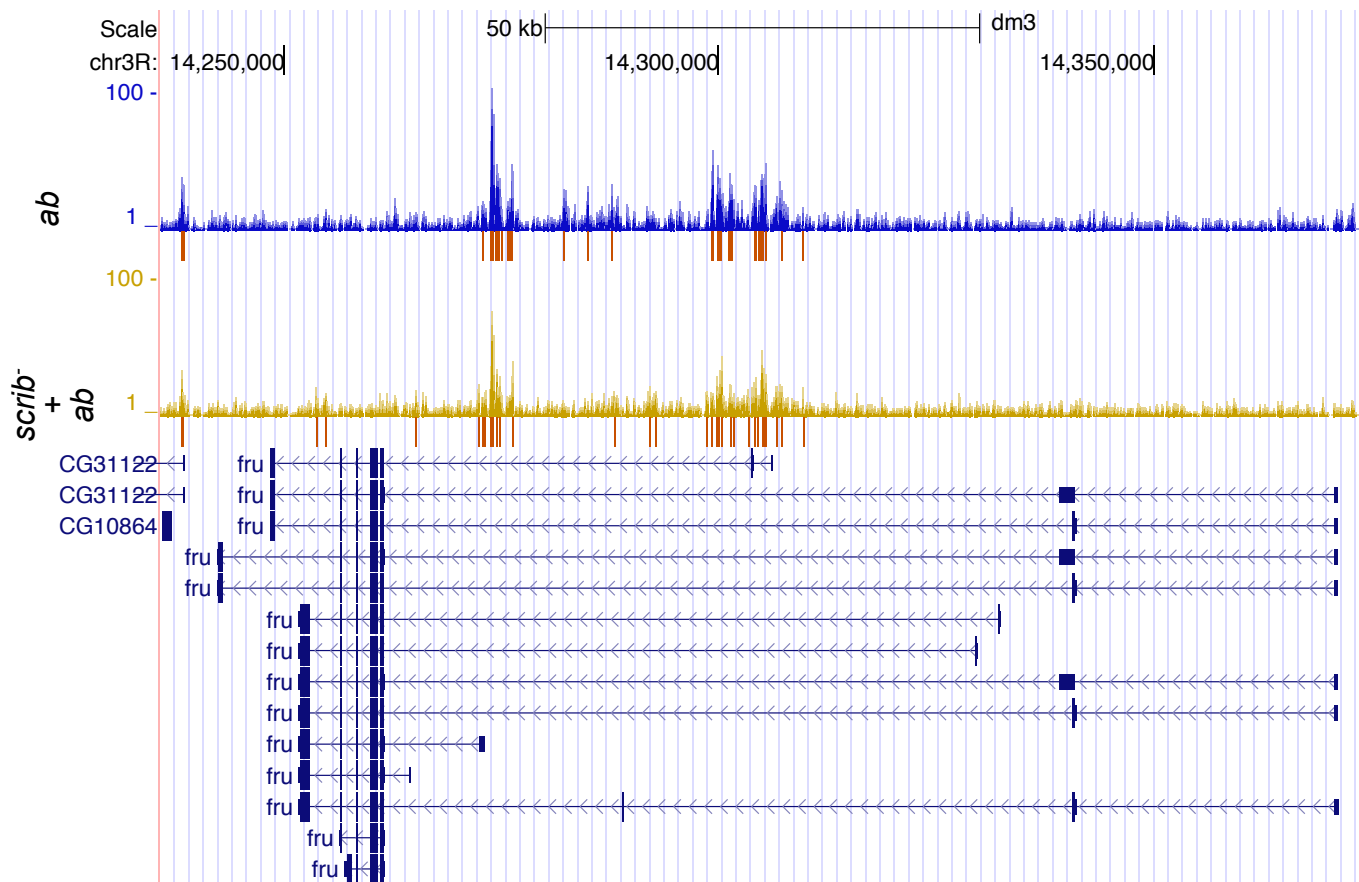

*ft*

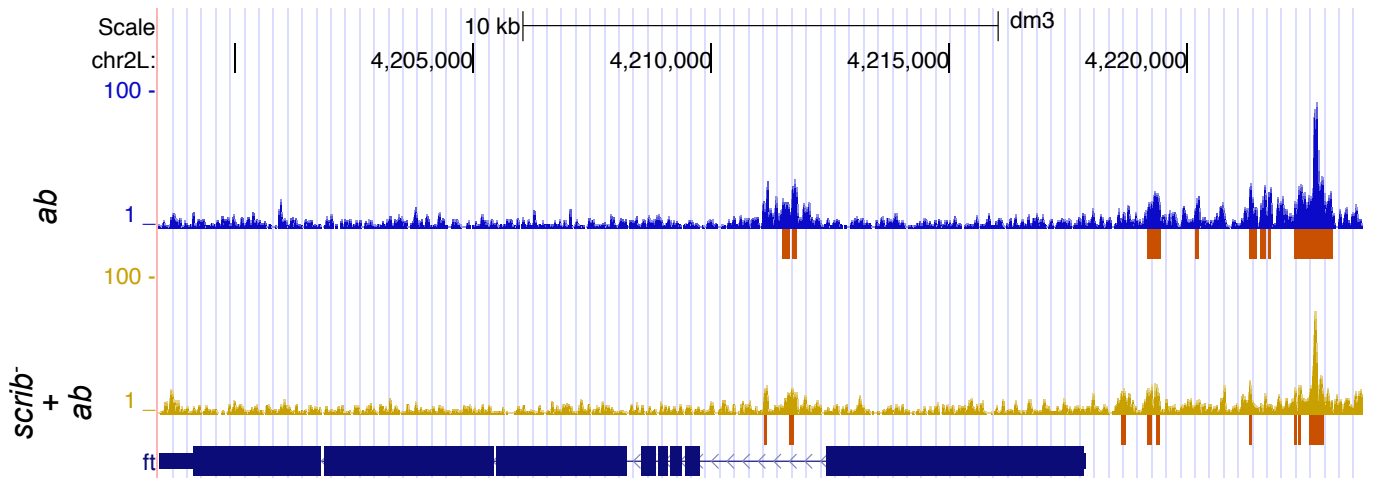

*ftz-f1*

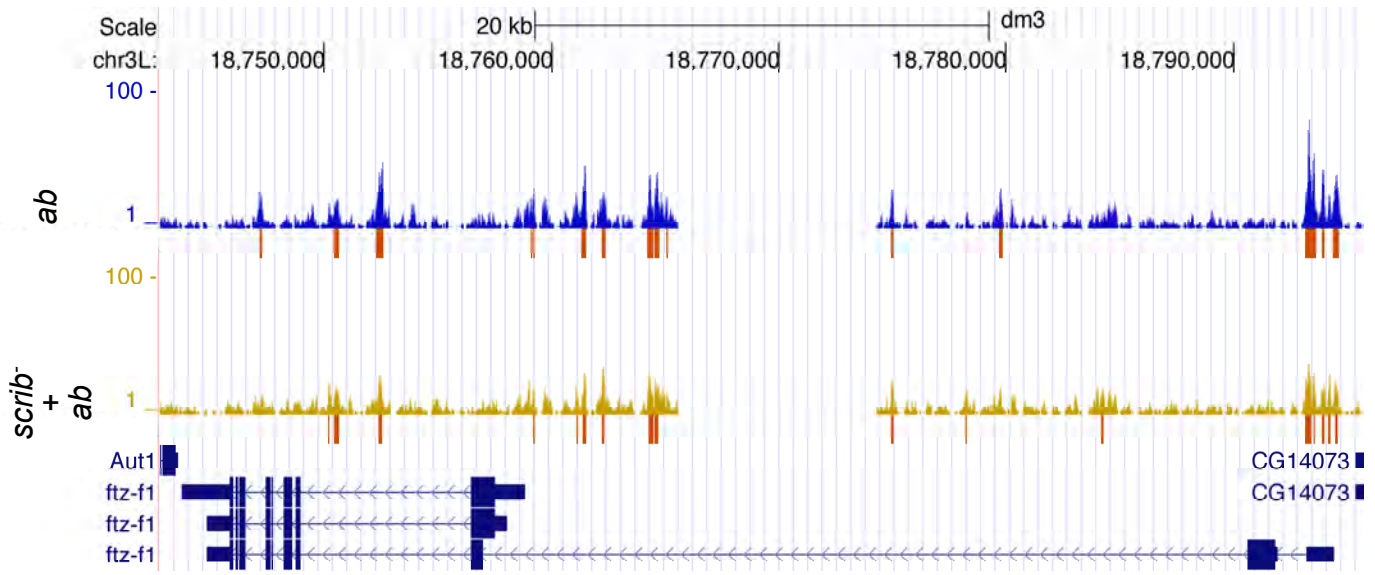

*HLHm3*

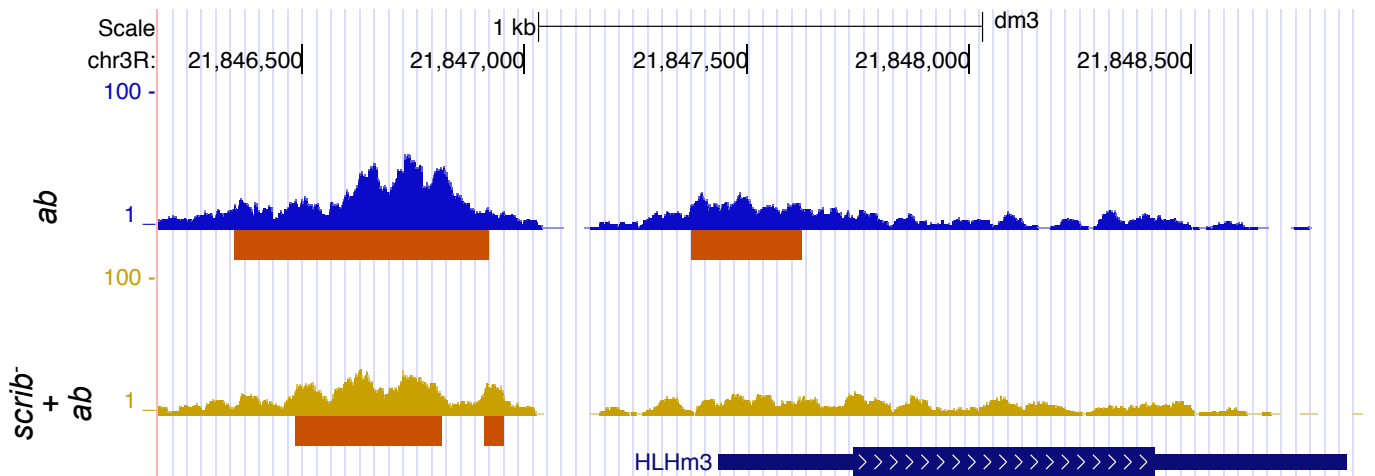

# HLHmbeta

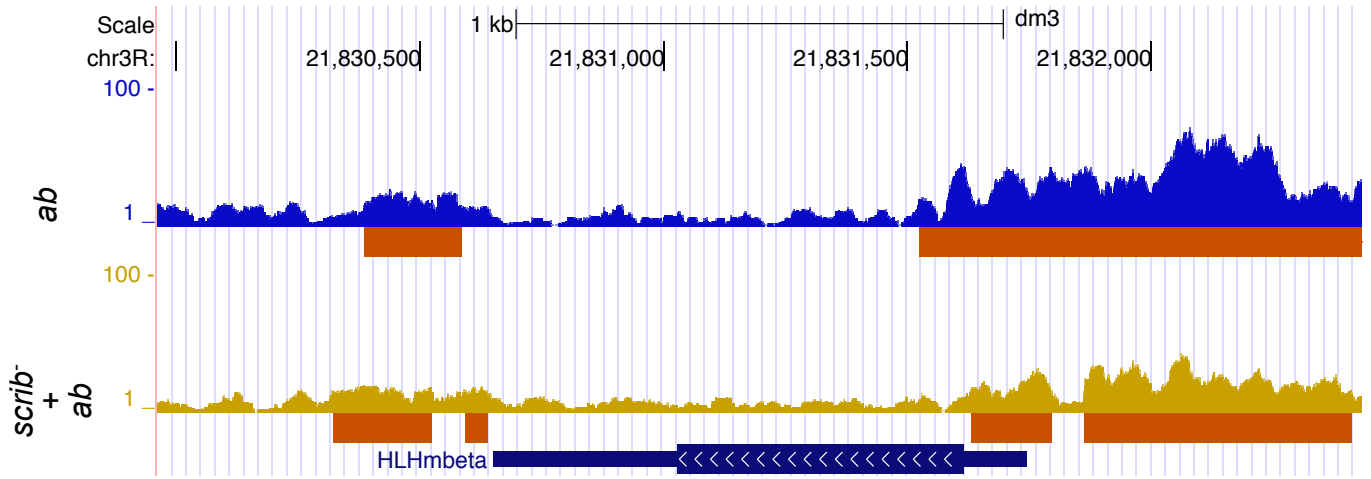

# Hr39

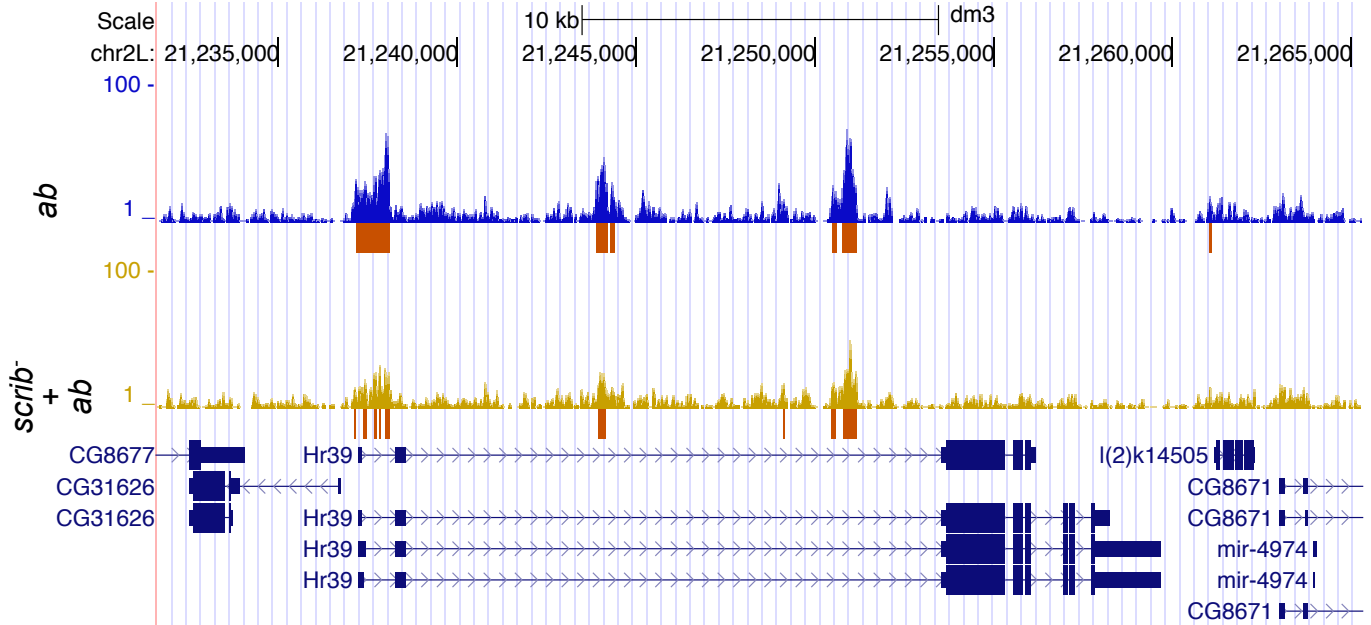

*hth*

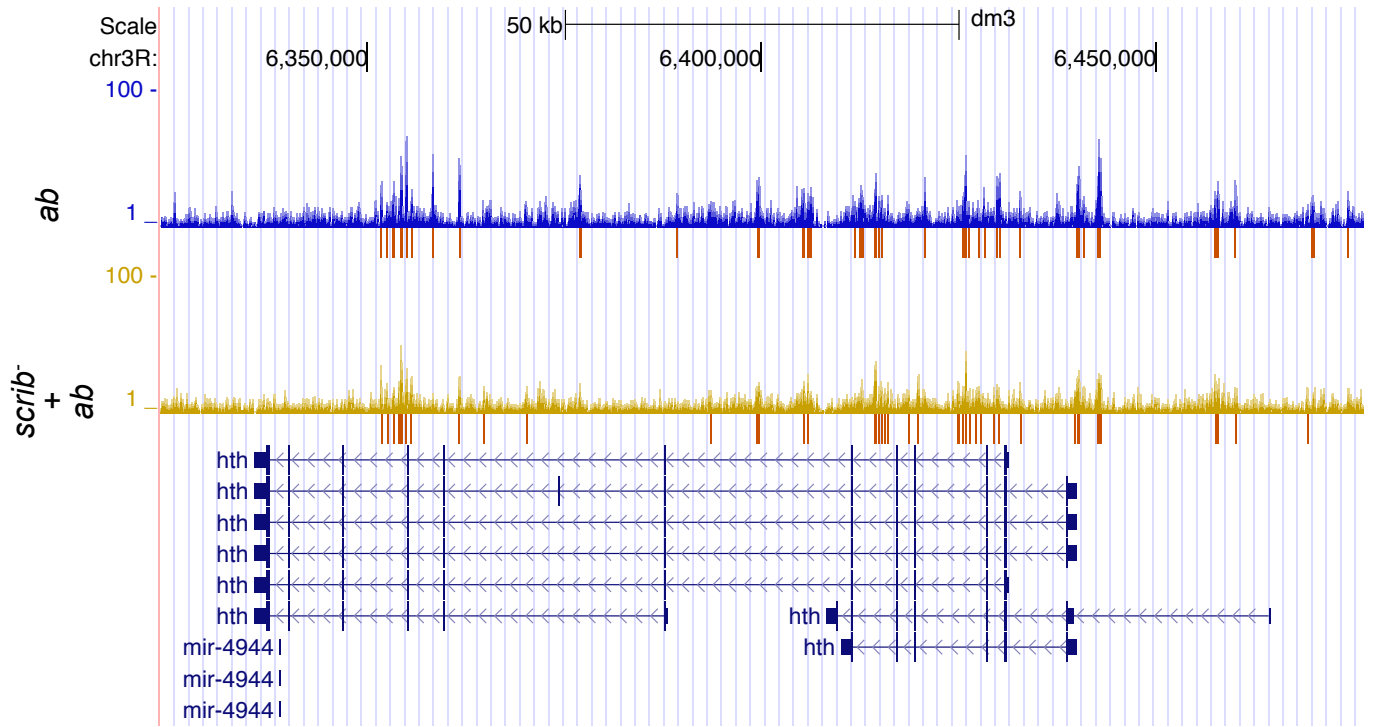

*ImpE1*

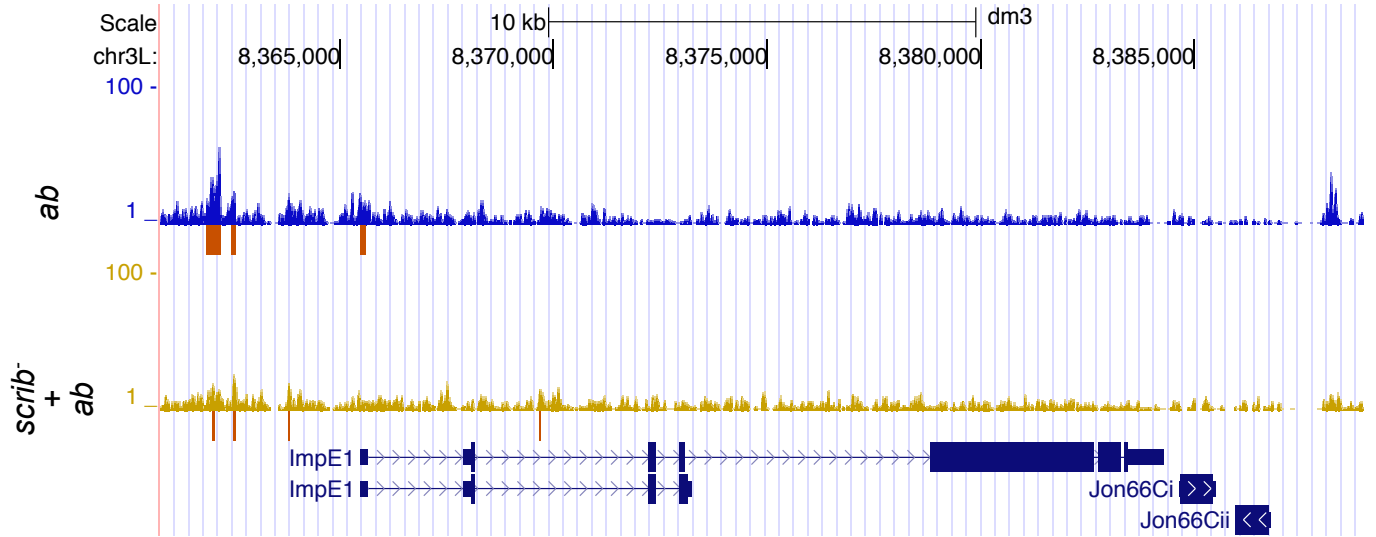

### ImpE3

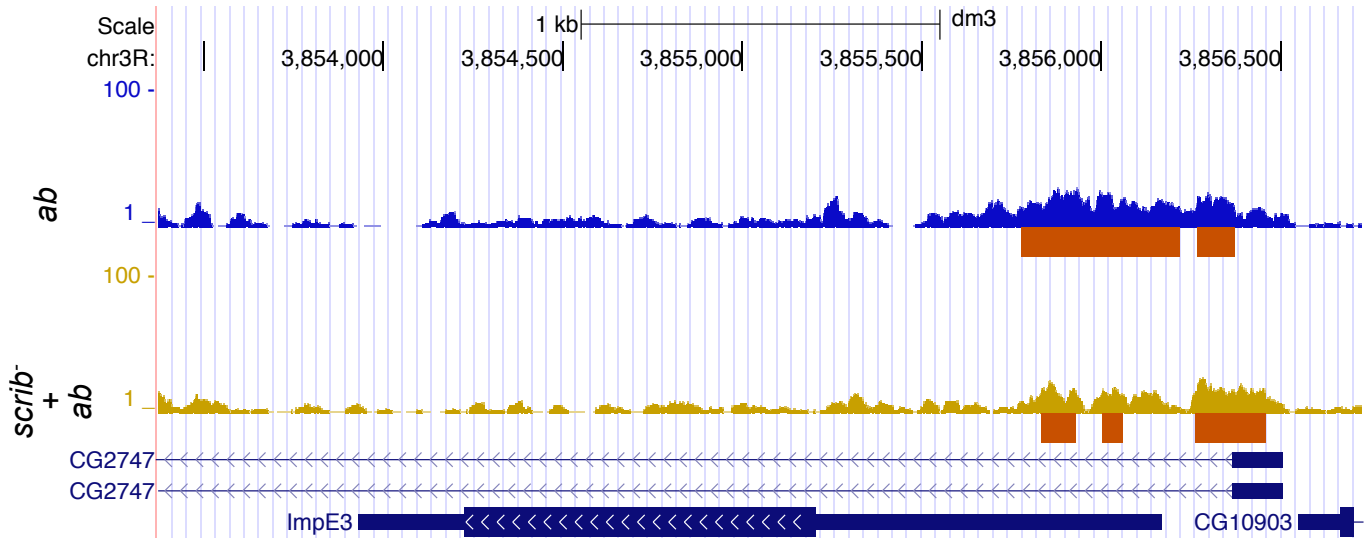

### ImpL2

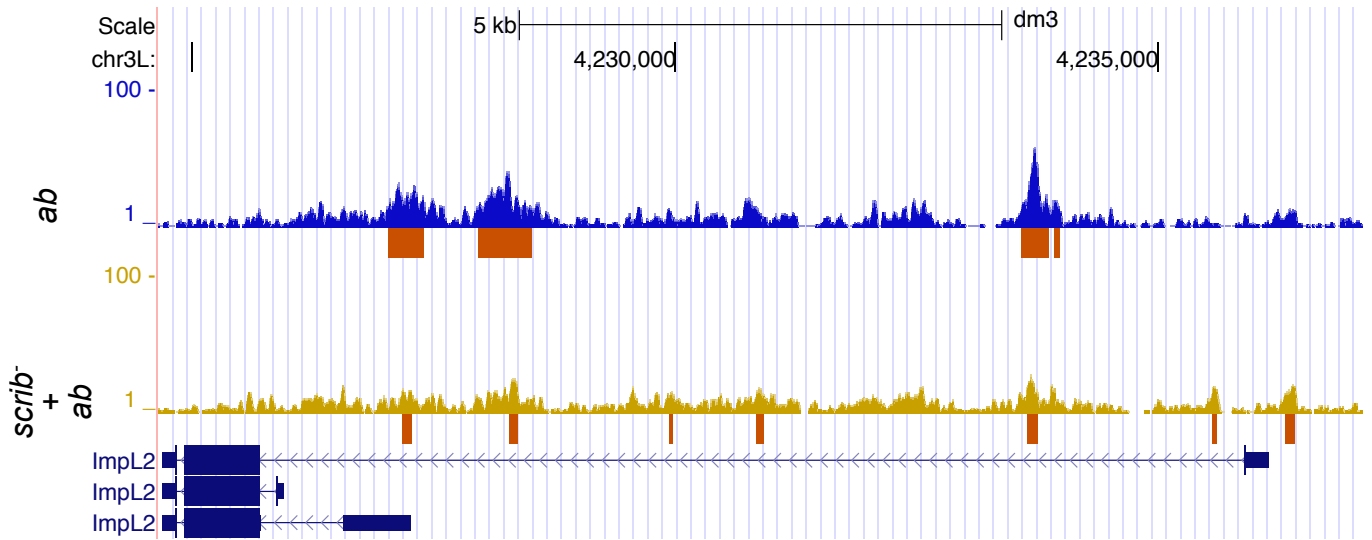

### ImpL3

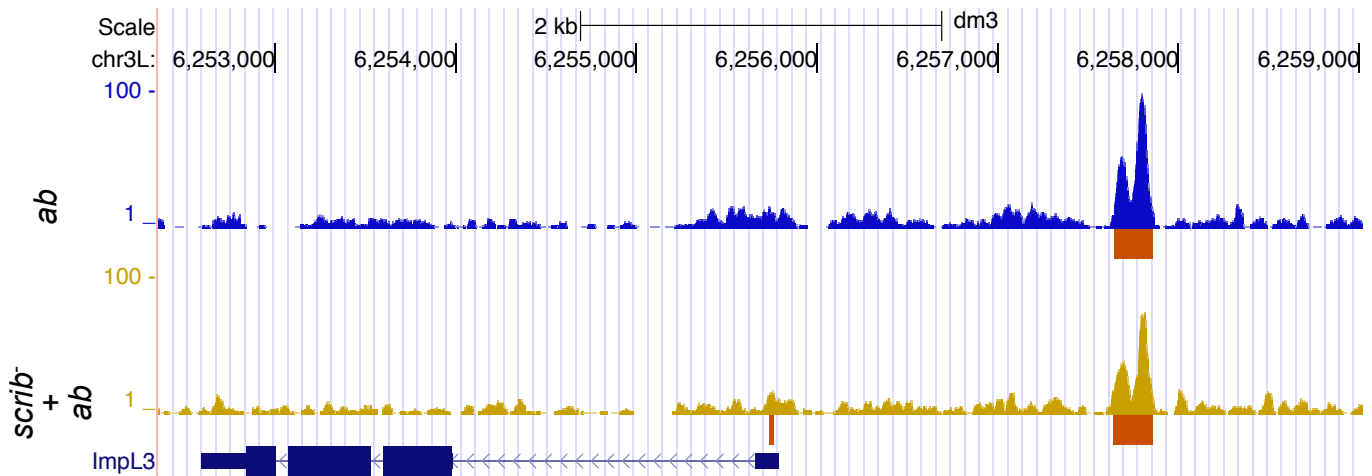



*lab*

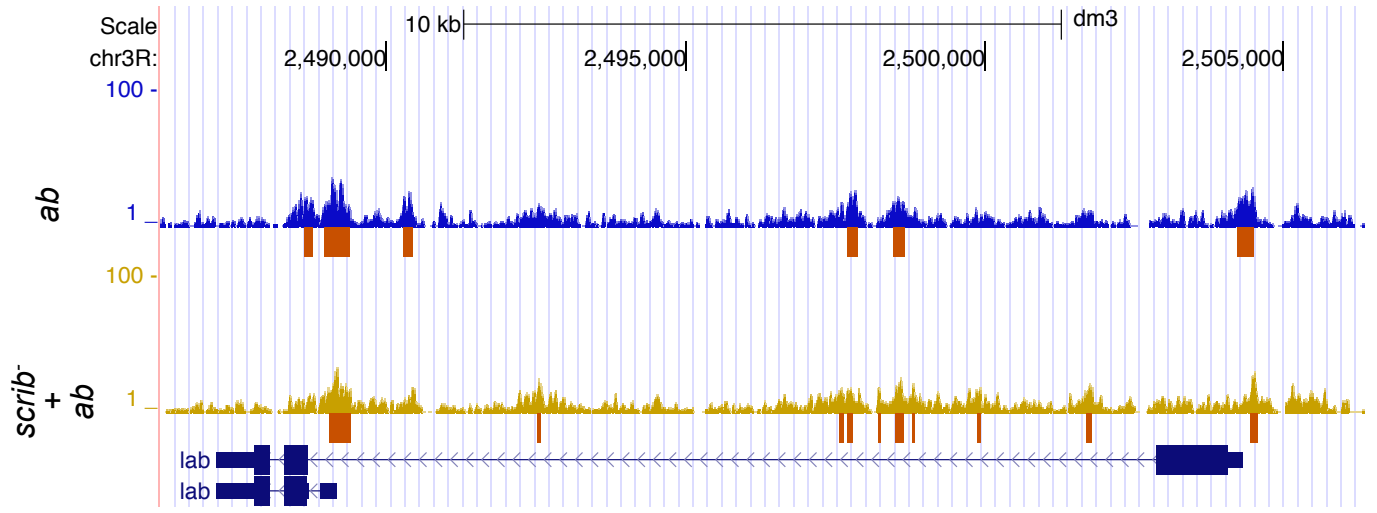



*m2*

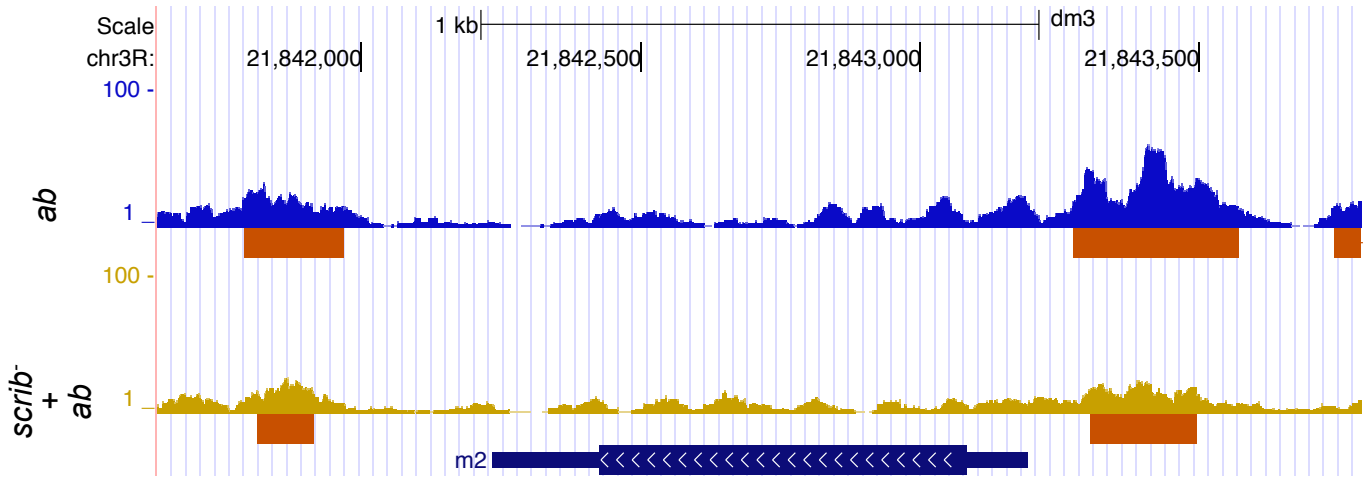

*malpha*

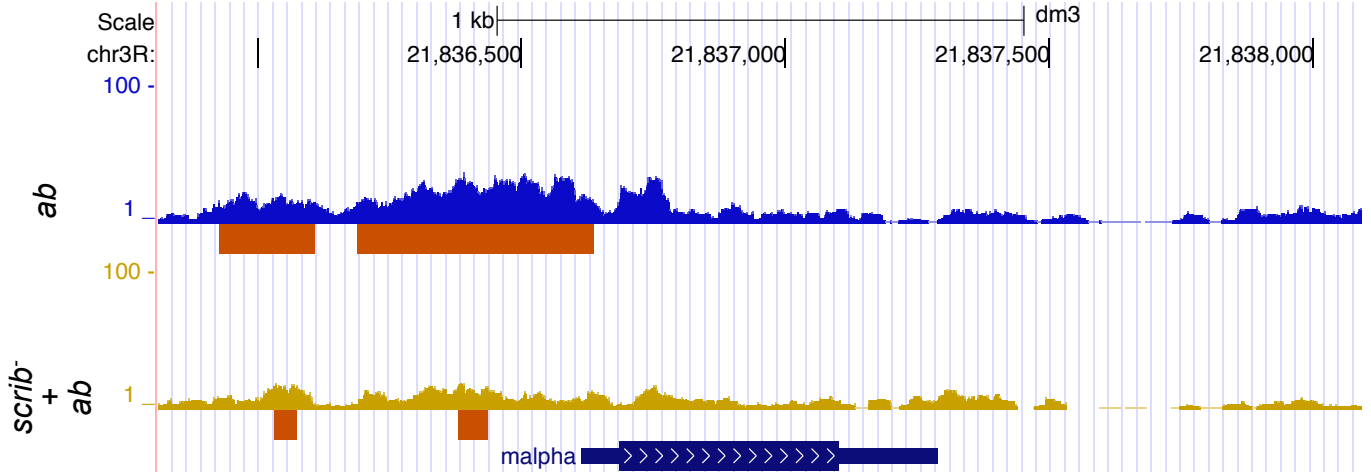

*mam*

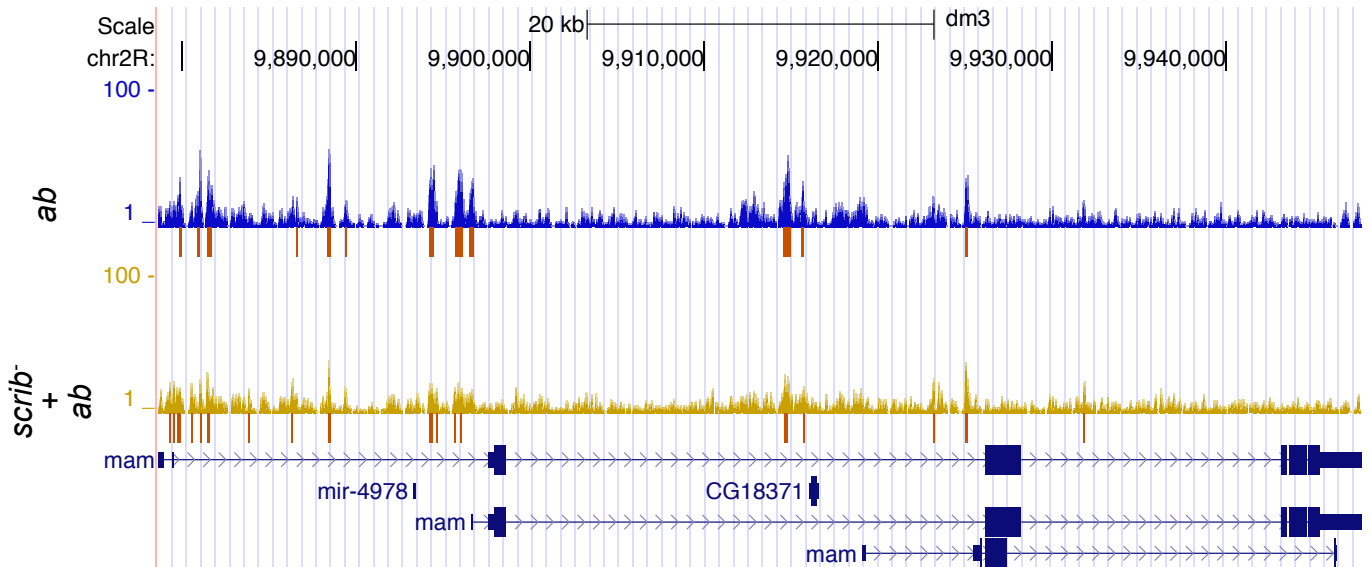



# mod(mdg4)

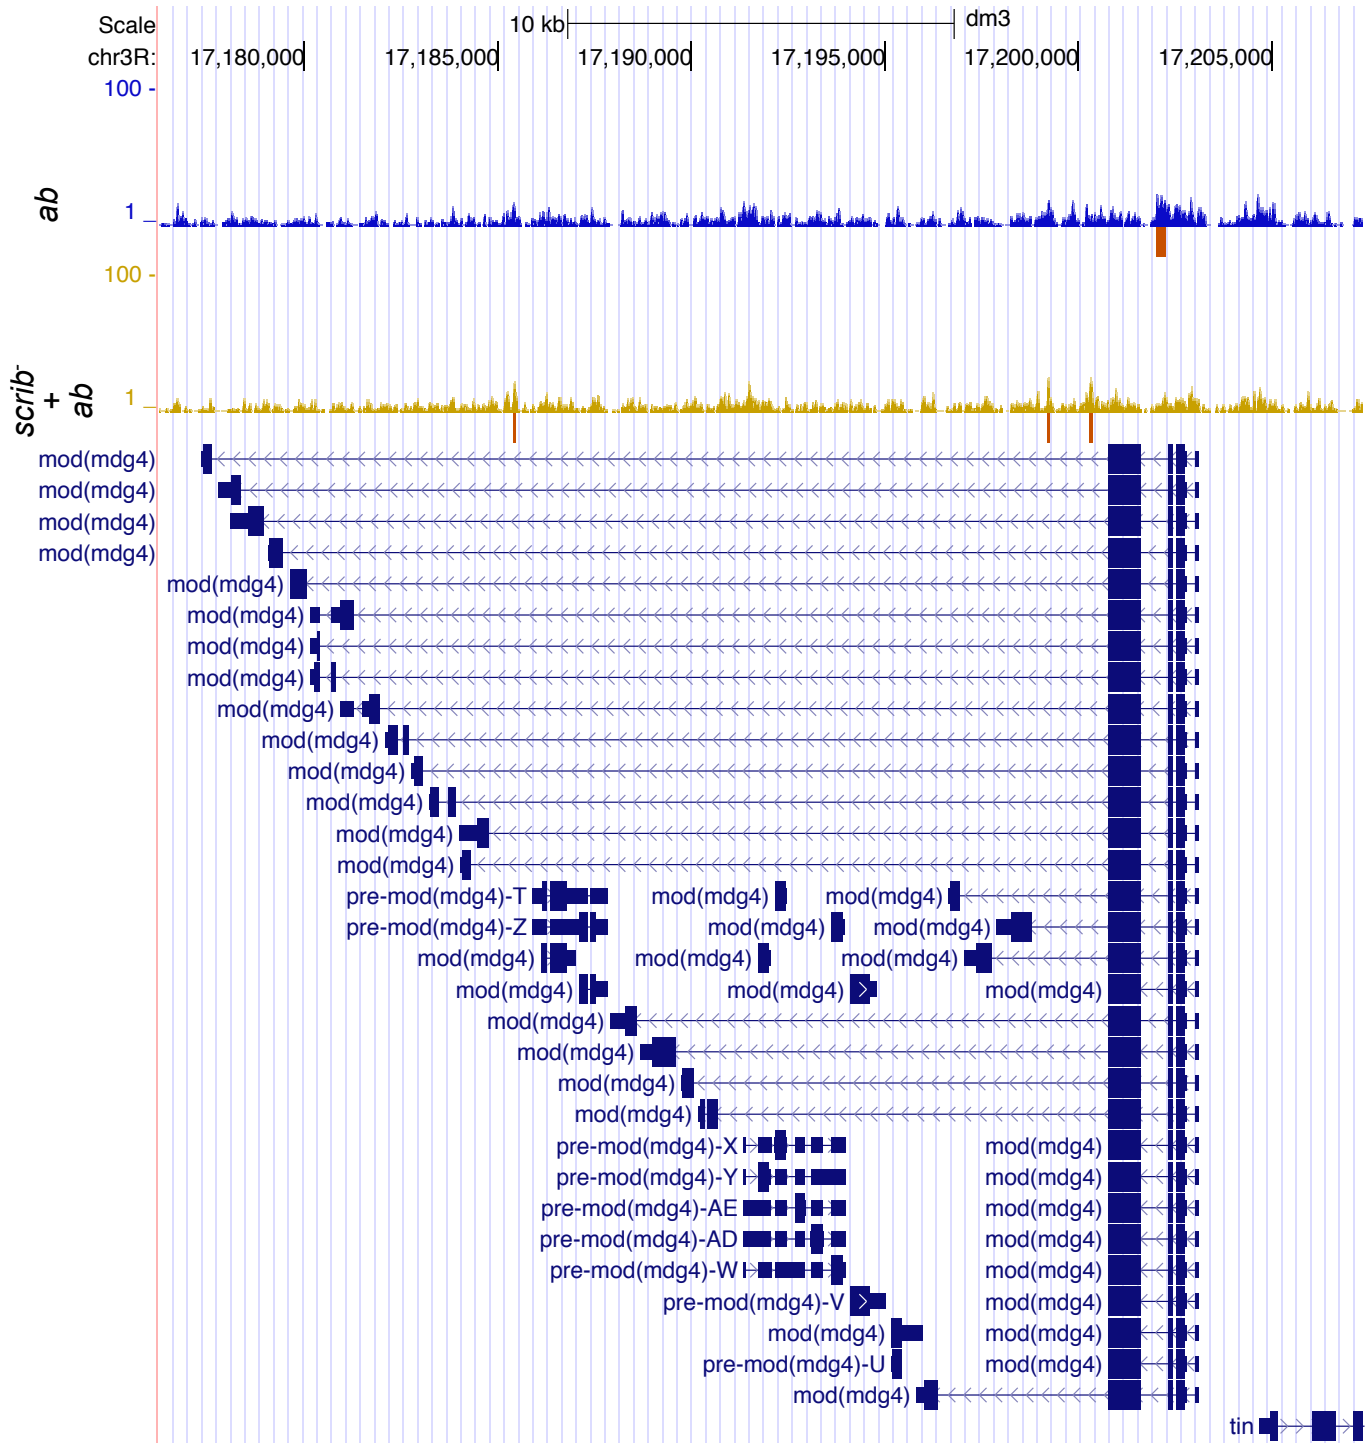

*N*

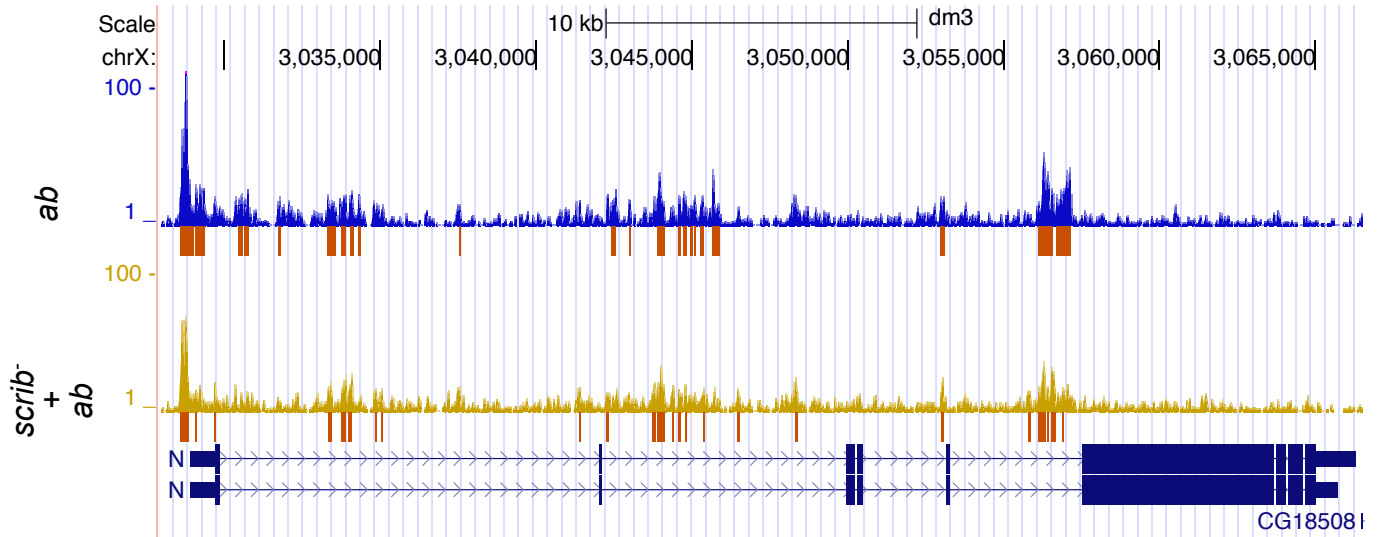

*noc*

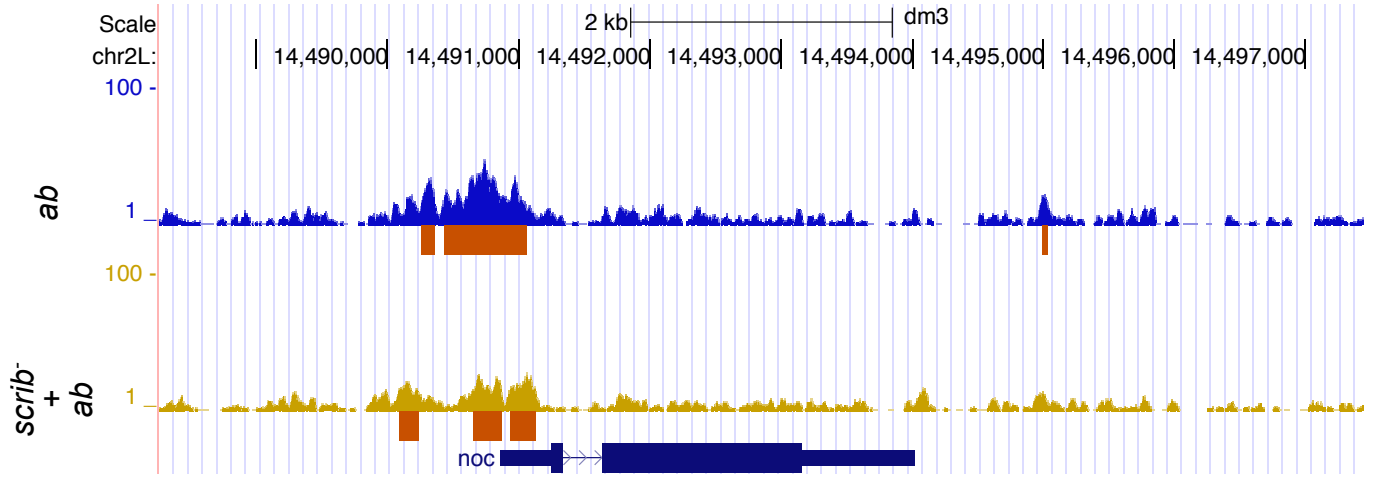

*odd*

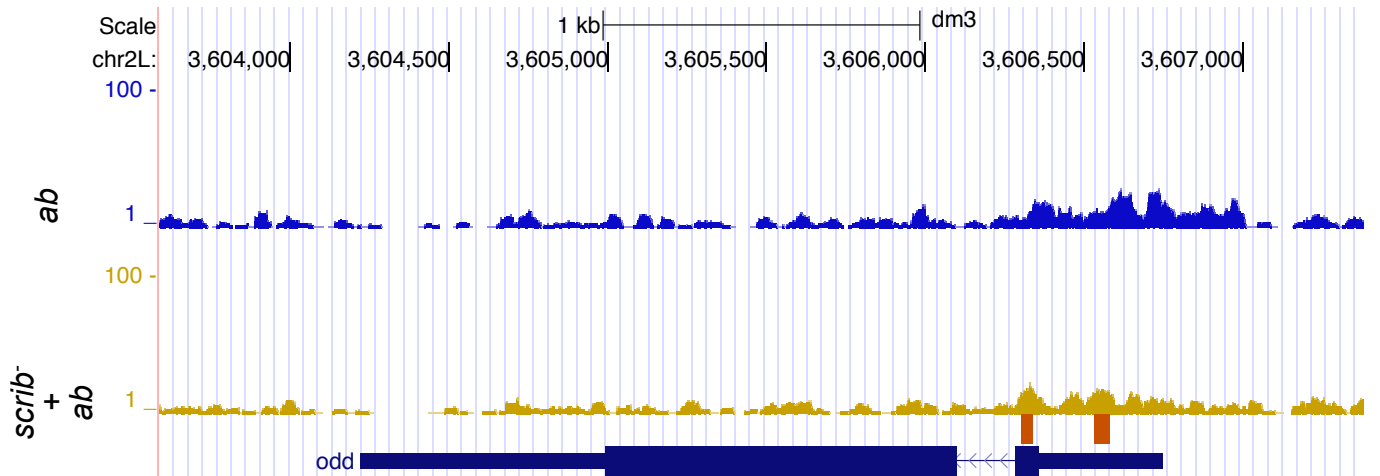

# Optix

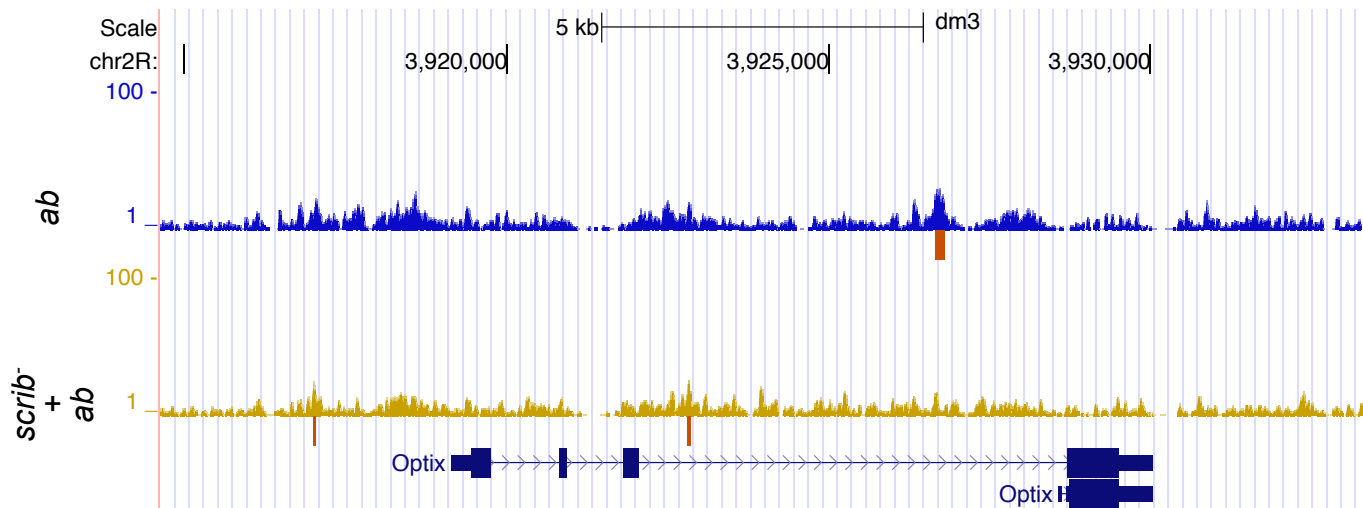

# Pax

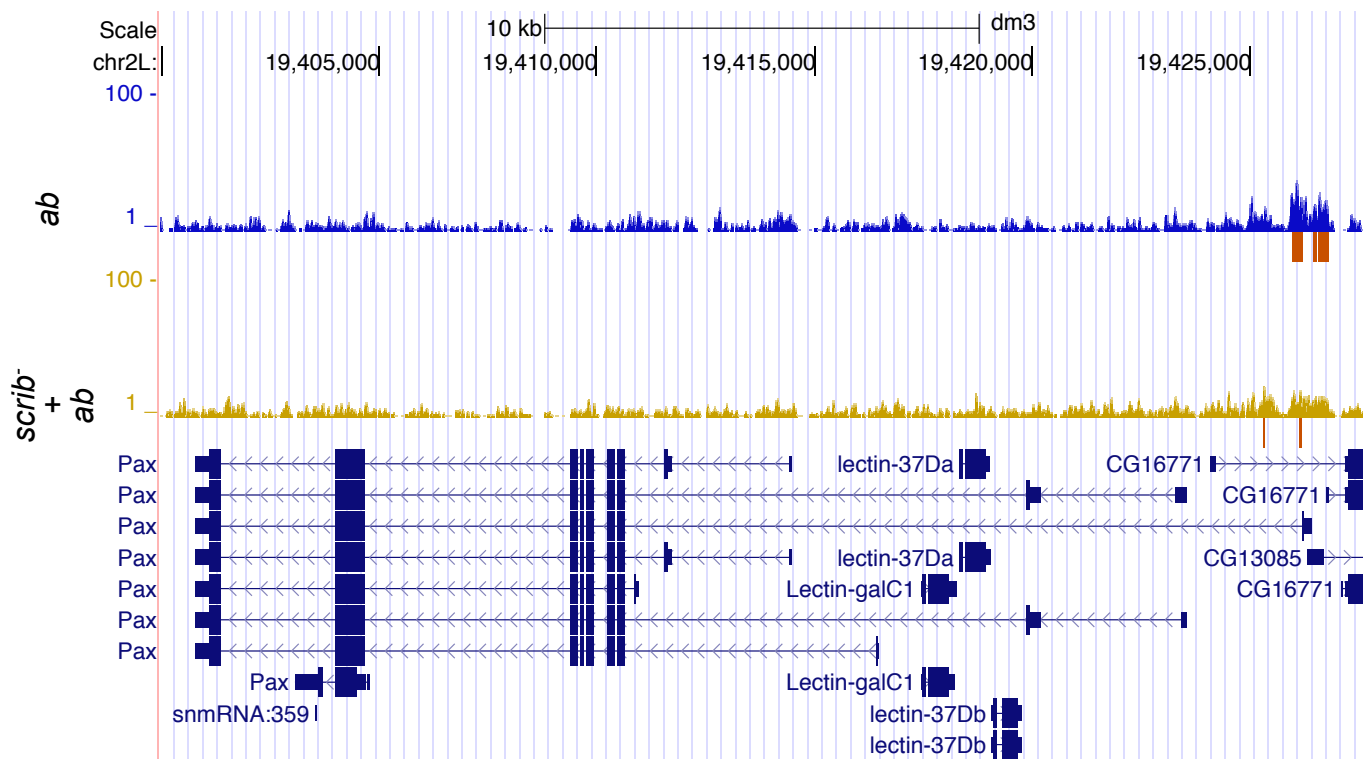

*Pc*

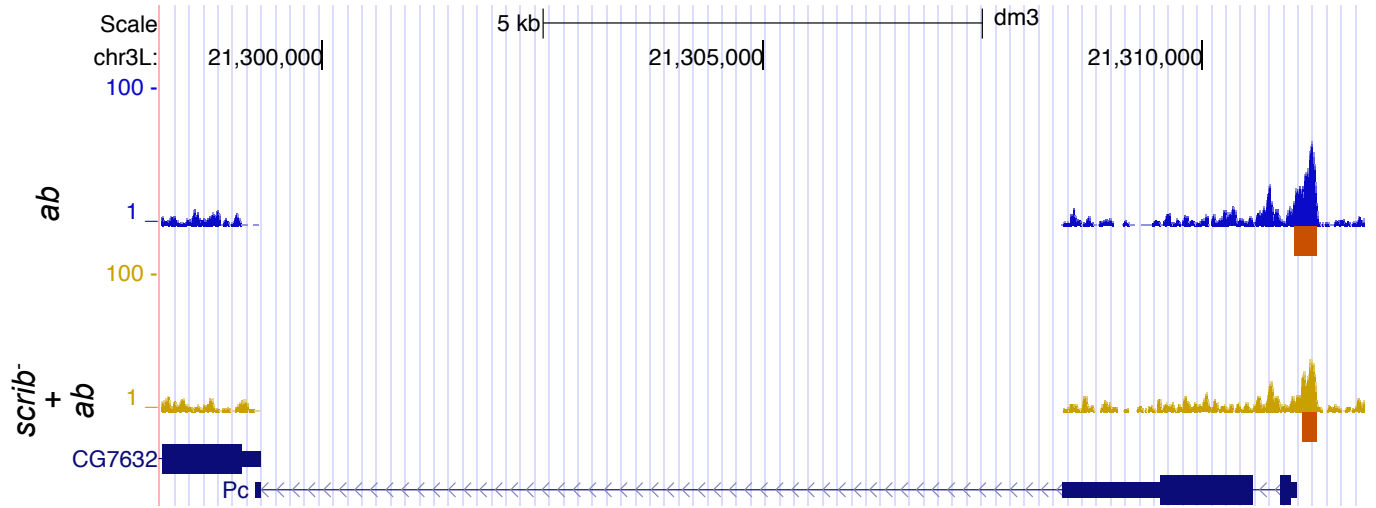

*Pcl*

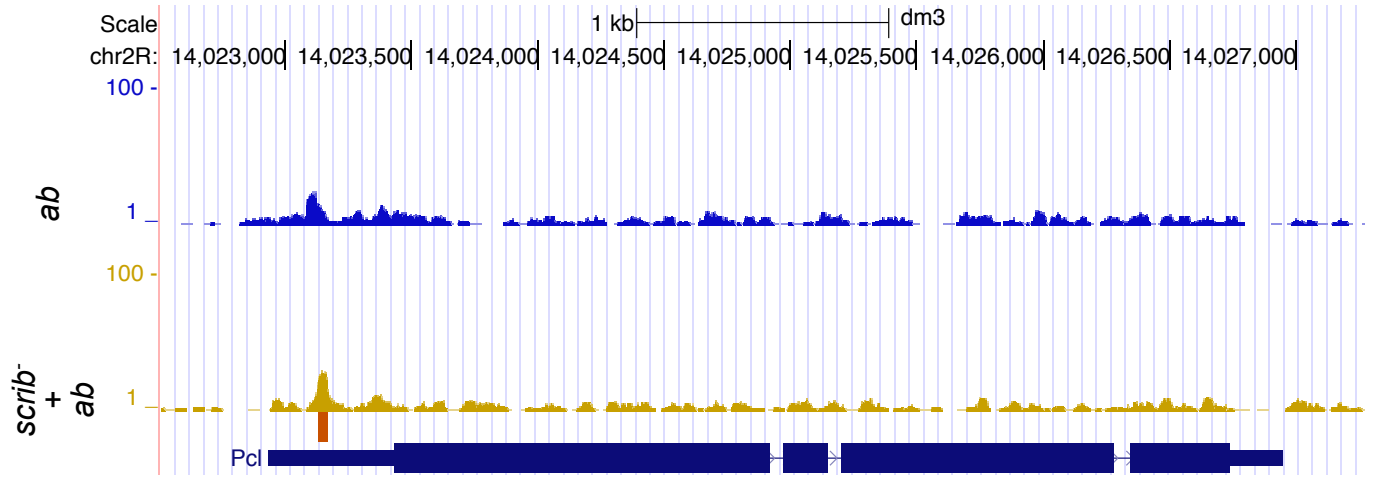

*ph-d*

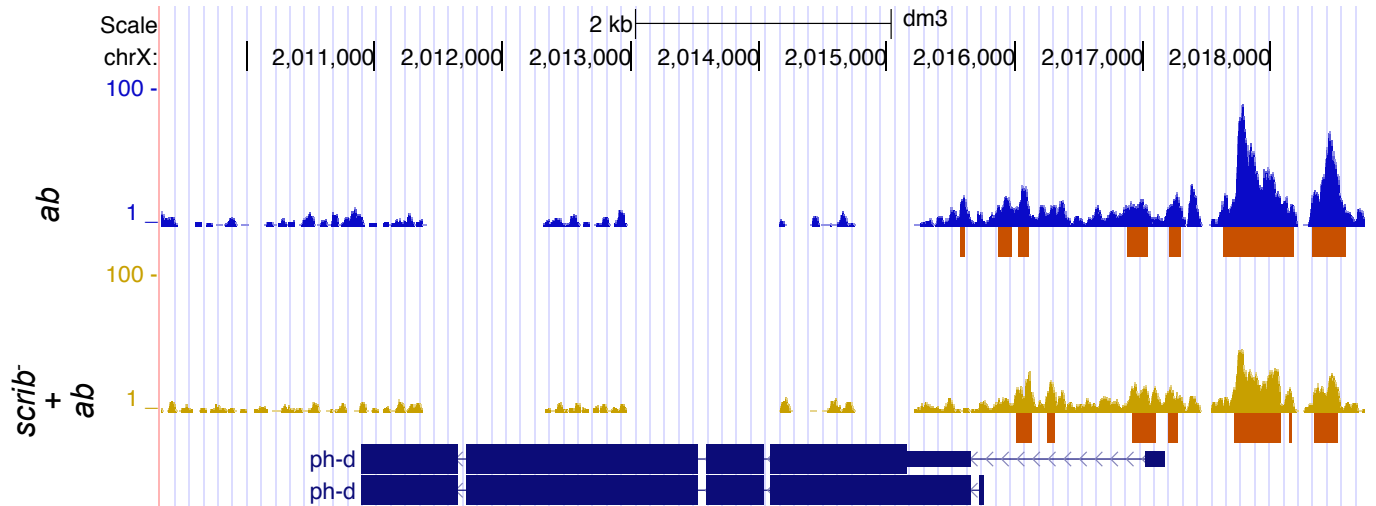



*ph-p*

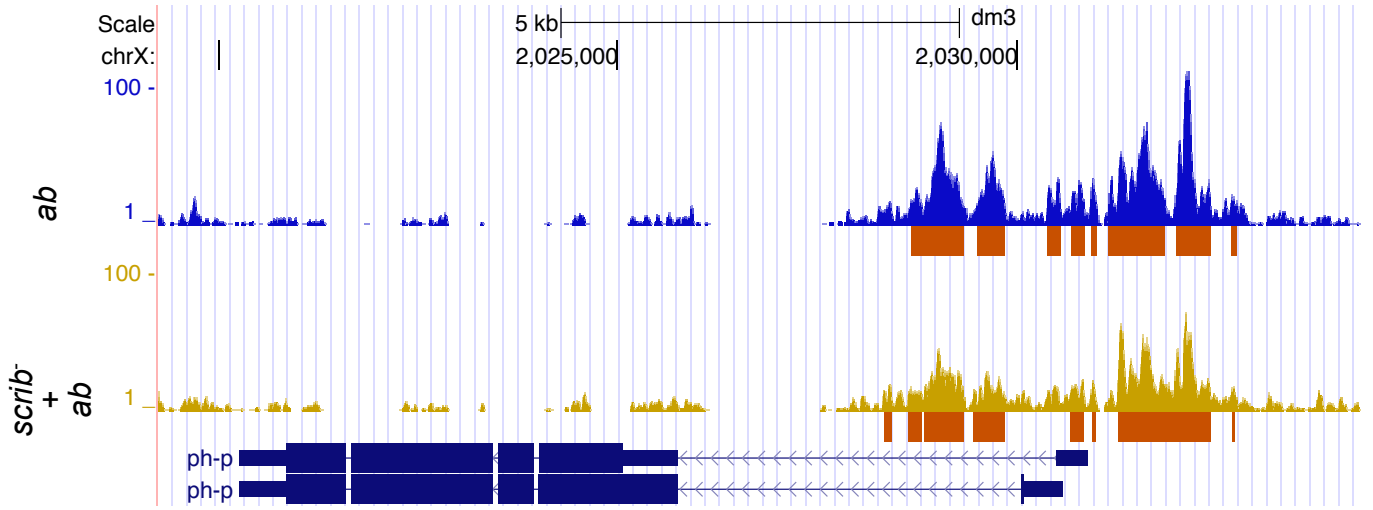

*Psc*

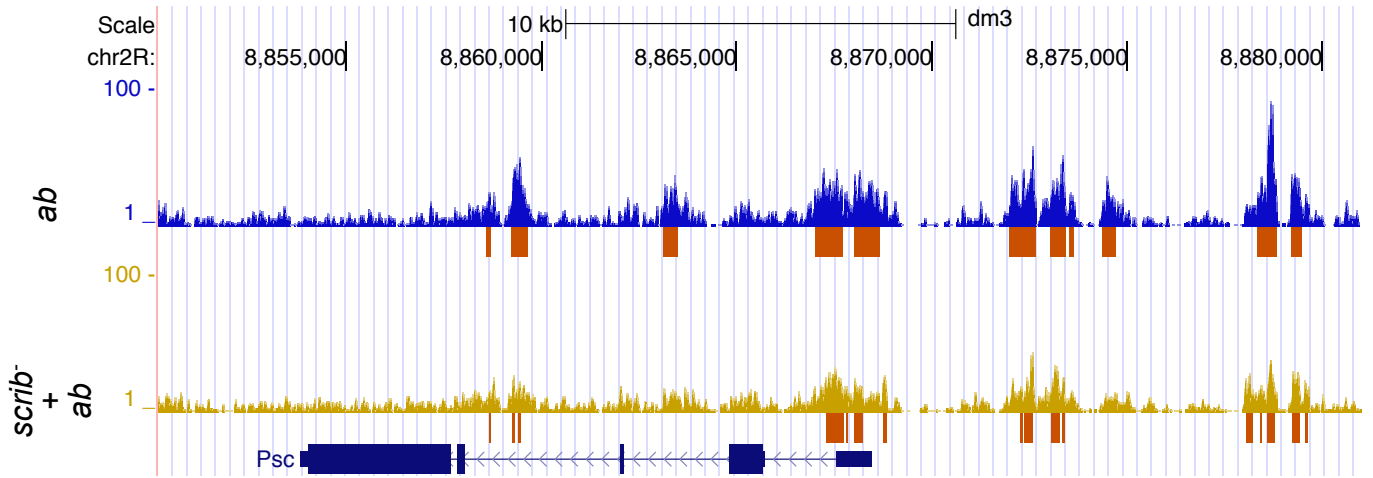



*salm*

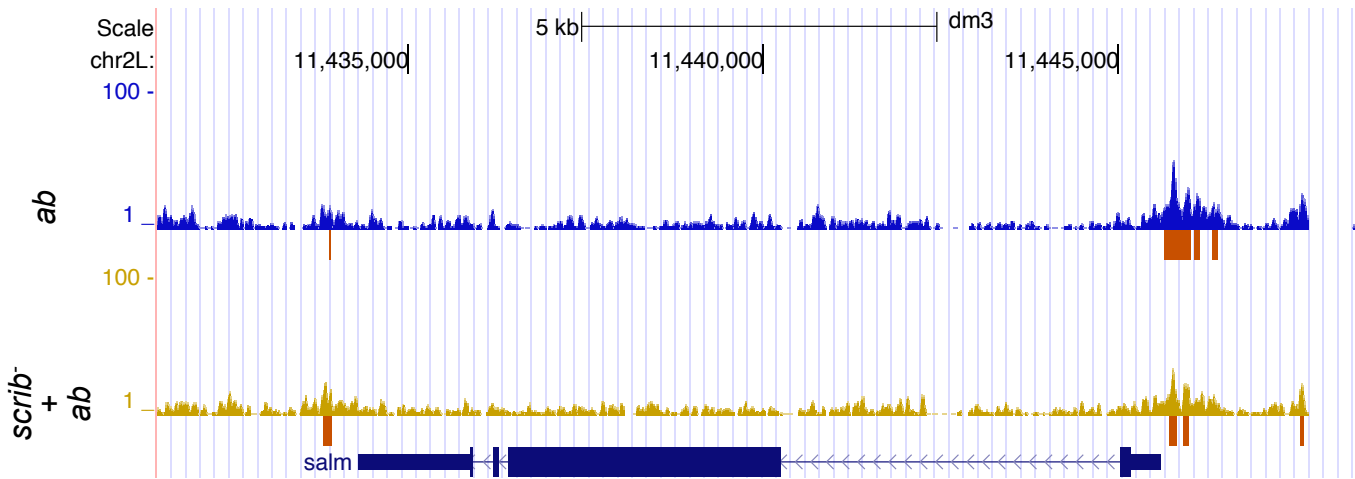

*scaf*

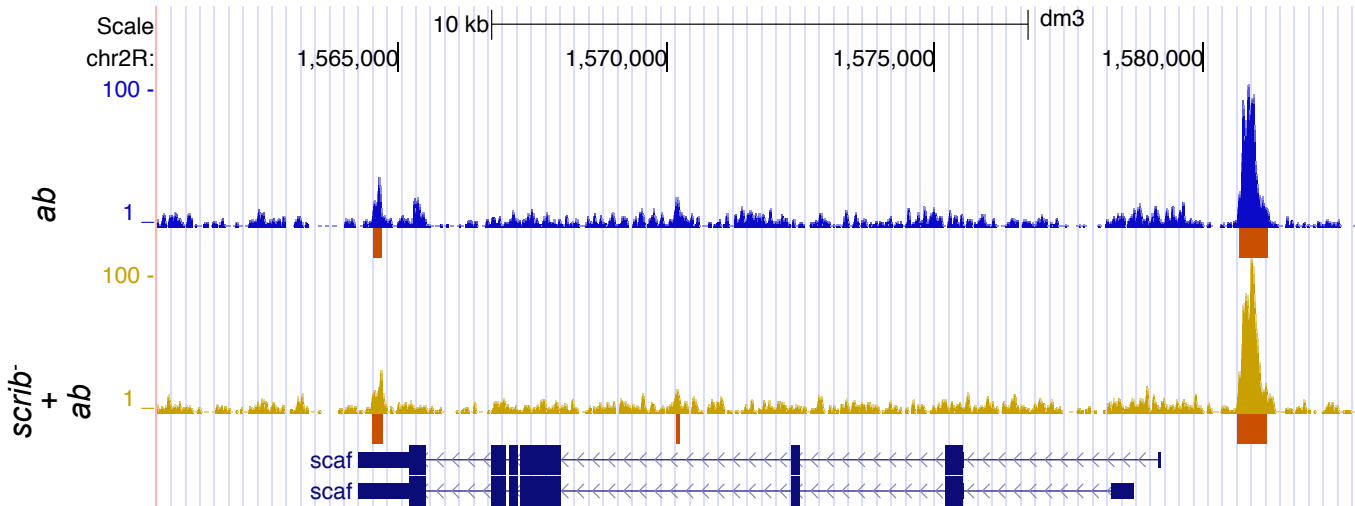

*Ser*

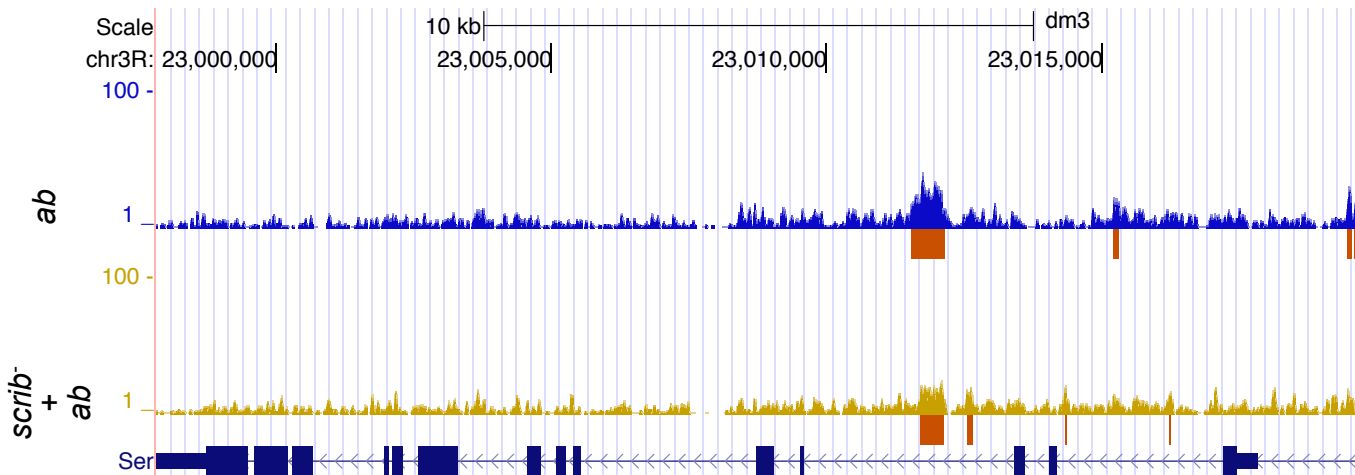

*skd*

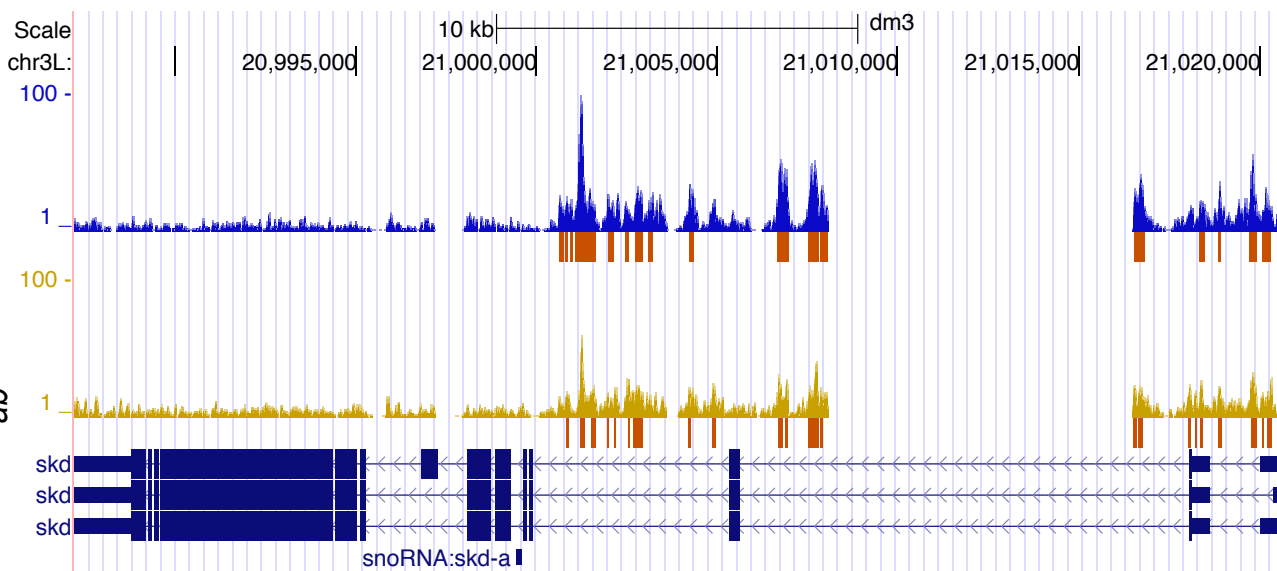

*ss*

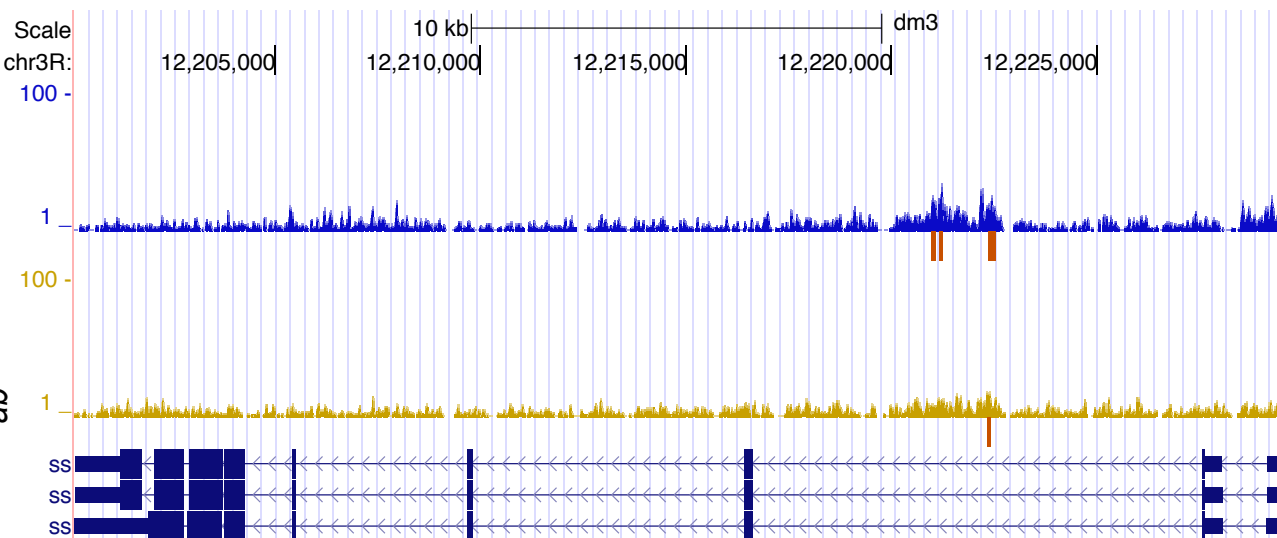

*Su(H)*

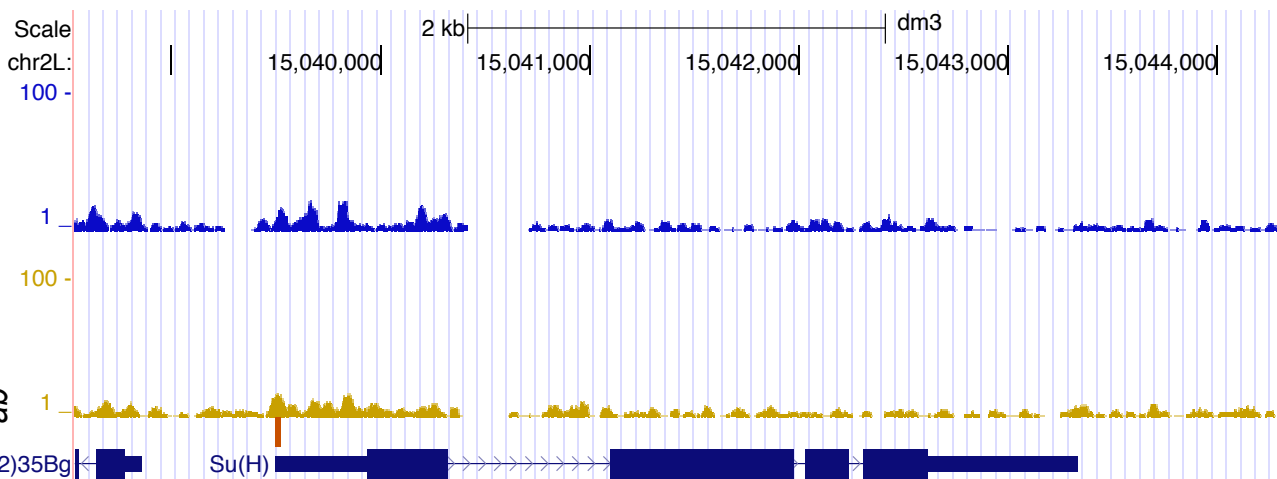

*th*

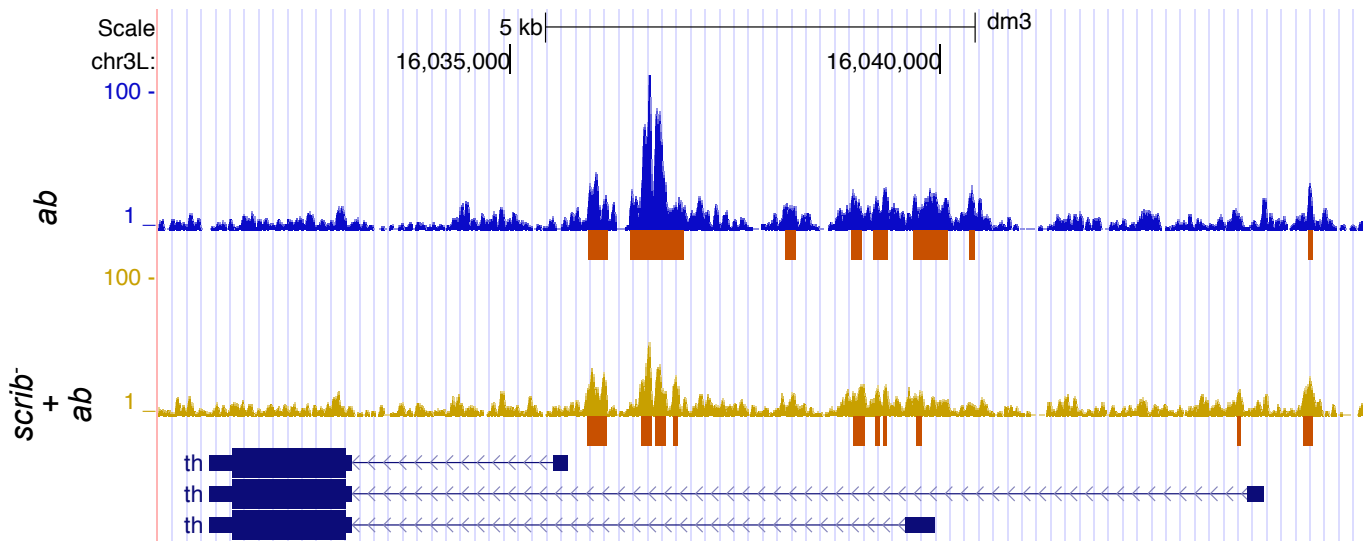

*toe*

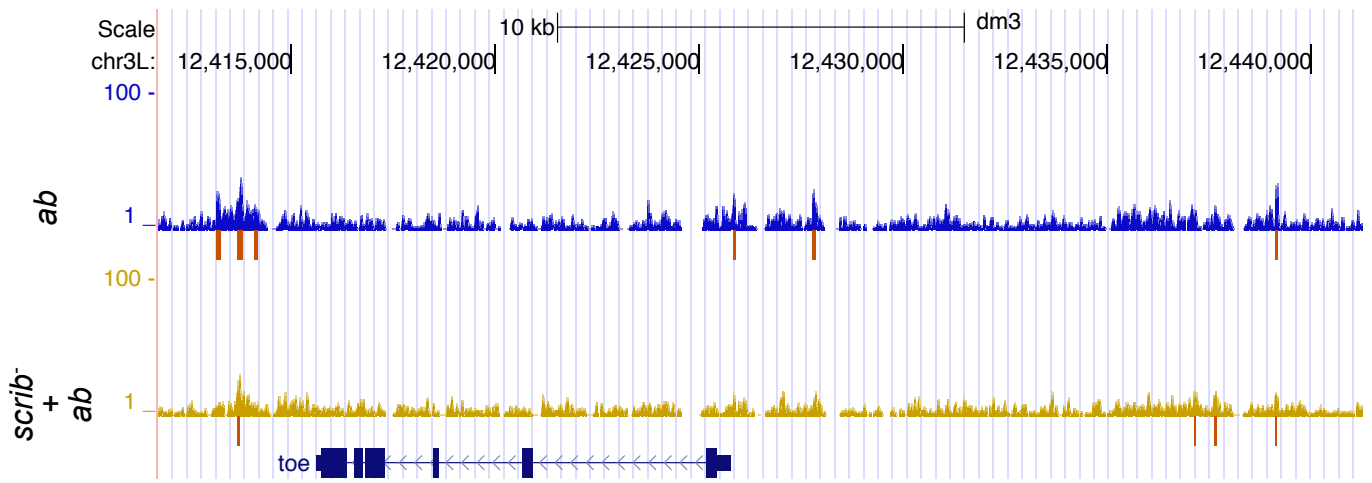



*wts*

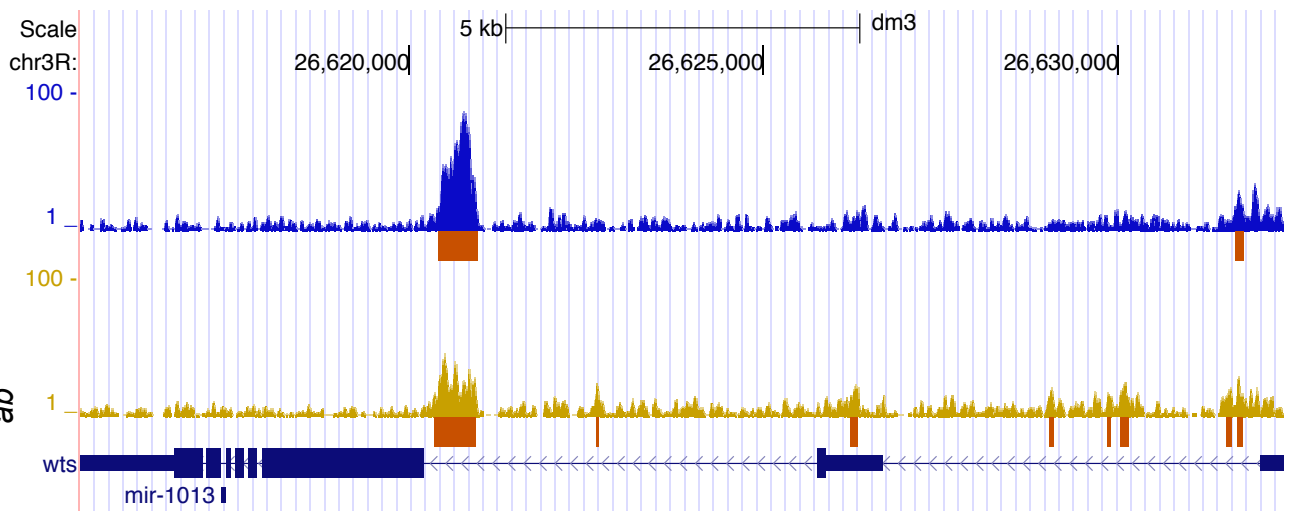

Supplement: pgen.1003627.s004.pdf [file pgen.1003627.s004.pdf]
