# Supplementary material for: The BTB-zinc Finger Transcription Factor Abrupt Acts as an Epithelial Oncogene in Drosophila melanogaster through Maintaining a Progenitor-like Cell State
Source: PubMed Central journal article supplement (PMC3715428; doi:10.1371/journal.pgen.1003627), 2013-07-18
Supplement: pgen.1003627.s002.pdf [file pgen.1003627.s002.pdf]

## Alh

|              | Ab.vs.FRT | AbSCRIB.vs.FRT | Alignments                     |
|--------------|-----------|----------------|--------------------------------|
| 1623218_s_at | -1        | -1             | chr3R:2923389-2949907 // 100.0 |
| 1630415_at   | 1         | 0              | chr3R:2920321-2934139 // 100.0 |

## Aly

|              | Ab.vs.FRT | AbSCRIB.vs.FRT | Alignments                     |
|--------------|-----------|----------------|--------------------------------|
| 1630198_at   | -1        | -1             | chr3R:2905385-2906126 // 100.0 |
| 1634966_a_at | -1        | -1             | chr3R:2905385-2906126 // 100.0 |
| 1640178_at   | 0         | 0              | chr3R:2903617-2906126 // 100.0 |

## Ank2

|              | Ab.vs.FRT | AbSCRIB.vs.FRT | Alignments                     |
|--------------|-----------|----------------|--------------------------------|
| 1623451_at   | 0         | 0              | chr3L:7710448-7711439 // 100.0 |
| 1631662_a_at | -1        | -1             | chr3L:7649589-7657189 // 100.0 |
| 1633313_at   | 0         | -1             | chr3L:7648488-7690761 // 99.87 |
| 1640337_a_at | -1        | -1             | chr3L:7697917-7706720 // 99.89 |

## B52

|              | Ab.vs.FRT | AbSCRIB.vs.FRT | Alignments                     |
|--------------|-----------|----------------|--------------------------------|
| 1624547_s_at | -1        | -1             | chr3R:9487021-9489304 // 100.0 |
| 1628399_s_at | -1        | -1             | chr3R:9487021-9492617 // 100.0 |
| 1631082_at   | 0         | 0              | chr3R:9487021-9488913 // 100.0 |
| 1632447_at   | 0         | -1             | chr3R:9487021-9489304 // 100.0 |
| 1633821_at   | 0         | 1              | chr3R:9487021-9492617 // 100.0 |

## bbg

|            | Ab.vs.FRT | AbSCRIB.vs.FRT | Alignments                       |
|------------|-----------|----------------|----------------------------------|
| 1630921_at | 0         | -1             | chr3L:14500705-14506348 // 100.0 |
| 1636947_at | -1        | -1             | chr3L:14405922-14410432 // 100.0 |

## beat-IIIc

|              | Ab.vs.FRT | AbSCRIB.vs.FRT | Alignments                       |
|--------------|-----------|----------------|----------------------------------|
| 1625349_at   | 0         | -1             | chr2L:17189809-17260732 // 100.0 |
| 1633927_a_at | -1        | -1             | chr2L:17189829-17260732 // 98.86 |

## br

|              | Ab.vs.FRT | AbSCRIB.vs.FRT | Alignments                    |
|--------------|-----------|----------------|-------------------------------|
| 1626996_s_at | 0         | -1             | chrX:1504544-1543426 // 99.9  |
| 1629683_at   | -1        | -1             | chrX:1506373-1553964 // 100.0 |
| 1635691_at   | 0         | 0              | chrX:1518170-1555575 // 100.0 |
| 1636931_at   | -1        | -1             | chrX:1506373-1549402 // 100.0 |
| 1637312_a_at | 0         | 0              | chrX:1506373-1539198 // 100.0 |

## btsz

|            | Ab.vs.FRT | AbSCRIB.vs.FRT | Alignments                       |
|------------|-----------|----------------|----------------------------------|
| 1624207_at | -1        | -1             | chr3R:10632901-10635844 // 100.0 |
| 1631518_at | -1        | -1             | chr3R:10639720-10679621 // 100.0 |

#### CalpA

|              | Ab.vs.FRT | AbSCRIB.vs.FRT | Alignments                       |
|--------------|-----------|----------------|----------------------------------|
| 1628628_at   | 0         | 1              | chr2R:15312577-15318068 // 100.0 |
| 1633524_a_at | -1        | 0              | chr2R:15312577-15316555 // 100.0 |
| 1638939_at   | -1        | 0              | chr2R:15312577-15316555 // 100.0 |

#### caps

|              | Ab.vs.FRT | AbSCRIB.vs.FRT | Alignments                       |
|--------------|-----------|----------------|----------------------------------|
| 1632508_s_at | -1        | -1             | chr3L:13221788-13270860 // 100.0 |
| 1638580_at   | -1        | -1             | chr3L:13270415-13271131 // 100.0 |

#### Cbp80

|              | Ab.vs.FRT | AbSCRIB.vs.FRT | Alignments                    |
|--------------|-----------|----------------|-------------------------------|
| 1623101_at   | 1         | 0              | chrX:4544053-4552292 // 100.0 |
| 1636071_a_at | 0         | -1             | chrX:4544053-4552041 // 100.0 |

#### CG10344

|              | Ab.vs.FRT | AbSCRIB.vs.FRT | Alignments                       |
|--------------|-----------|----------------|----------------------------------|
| 1622933_at   | 1         | 0              | chr2R:18313255-18314459 // 99.65 |
| 1634822_a_at | 1         | 1              | chr2R:18313236-18314470 // 100.0 |

#### CG10874

|              | Ab.vs.FRT | AbSCRIB.vs.FRT | Alignments                     |
|--------------|-----------|----------------|--------------------------------|
| 1633055_at   | 0         | -1             | chr2L:2189912-2192372 // 100.0 |
| 1638122_a_at | 0         | -1             | chr2L:2190706-2192372 // 100.0 |

#### CG11727 /// DsimCG11727

|              | Ab.vs.FRT | AbSCRIB.vs.FRT | Alignments                      |
|--------------|-----------|----------------|---------------------------------|
| 1626533_a_at | -1        | -1             | chrX:11328690-11348335 // 99.87 |
| 1638996_at   | 0         | 1              | chrX:11326944-11348335 // 100.0 |

#### CG11905

|              | Ab.vs.FRT | AbSCRIB.vs.FRT | Alignments                       |
|--------------|-----------|----------------|----------------------------------|
| 1632514_s_at | 1         | 0              | chr3L:16924267-16928632 // 100.0 |
| 1637724_s_at | 1         | 0              | chr3L:16923216-16928632 // 100.0 |
| 1638986_s_at | 0         | -1             | chr3L:16922056-16928632 // 100.0 |

#### CG12054

|            | Ab.vs.FRT | AbSCRIB.vs.FRT | Alignments                       |
|------------|-----------|----------------|----------------------------------|
| 1628688_at | -1        | -1             | chr3R:27046425-27054213 // 100.0 |

1637162\_at 1 1 chr3R:27054418-27054846 // 100.0

CG12038

|              | Ab.vs.FRT | AbSCRIB.vs.FRT | Alignments                   |
|--------------|-----------|----------------|------------------------------|
| 1627417_s_at | 0         | -1             | chr3L:994005-995549 // 100.0 |
| 1636312_at   | 1         | 0              | chr3L:993991-995711 // 100.0 |

CG12250

|              | Ab.vs.FRT | AbSCRIB.vs.FRT | Alignments                       |
|--------------|-----------|----------------|----------------------------------|
| 1629978_at   | 1         | 1              | chr3R:21418906-21434850 // 100.0 |
| 1637790_a_at | 0         | 0              | chr3R:21417854-21434850 // 100.0 |
| 1640067_at   | 1         | 0              | chr3R:21417854-21434850 // 100.0 |

CG13722

|              | Ab.vs.FRT | AbSCRIB.vs.FRT | Alignments                     |
|--------------|-----------|----------------|--------------------------------|
| 1625261_x_at | -1        | 0              | chr3L:4485408-4488013 // 100.0 |
| 1625282_at   | -1        | 0              | chr3L:4485408-4488013 // 100.0 |

CG13737

|              | Ab.vs.FRT | AbSCRIB.vs.FRT | Alignments                       |
|--------------|-----------|----------------|----------------------------------|
| 1634287_at   | 1         | -1             | chr3L:13872095-13876136 // 100.0 |
| 1636750_s_at | 1         | -1             | chr3L:13872095-13876136 // 100.0 |

CG14408

|              | Ab.vs.FRT | AbSCRIB.vs.FRT | Alignments                      |
|--------------|-----------|----------------|---------------------------------|
| 1625335_at   | 1         | 1              | chrX:14722783-14726090 // 100.0 |
| 1628948_a_at | 1         | 1              | chrX:14722783-14726090 // 100.0 |
| 1634311_at   | 1         | 1              | chrX:14721086-14724504 // 100.0 |

CG15059

|              | Ab.vs.FRT | AbSCRIB.vs.FRT | Alignments                      |
|--------------|-----------|----------------|---------------------------------|
| 1628534_at   | 0         | 1              | chrX:18152866-18153489 // 100.0 |
| 1638767_at   | 0         | 0              | chrX:18152974-18153481 // 100.0 |
| 1638769_a_at | 0         | 1              | chrX:18152866-18153489 // 100.0 |

CG15744

|              | Ab.vs.FRT | AbSCRIB.vs.FRT | Alignments                      |
|--------------|-----------|----------------|---------------------------------|
| 1634342_s_at | 0         | -1             | chrX:13182395-13187911 // 100.0 |
| 1639266_at   | 0         | -1             | chrX:13185615-13188469 // 100.0 |

CG1637

|            | Ab.vs.FRT | AbSCRIB.vs.FRT | Alignments                      |
|------------|-----------|----------------|---------------------------------|
| 1623285_at | 0         | 0              | chrX:10764614-10771840 // 100.0 |
| 1624797_at | 0         | -1             | chrX:10766373-10771840 // 100.0 |

1633563\_at -1 0 chrX:10768506-10771840 // 100.0

CG16885

|              | Ab.vs.FRT | AbSCRIB.vs.FRT | Alignments                       |
|--------------|-----------|----------------|----------------------------------|
| 1631302_at   | -1        | -1             | chr2L:13932558-13934691 // 99.11 |
| 1638475_a_at | 0         | -1             | chr2L:13932789-13934691 // 100.0 |

CG17124

|              | Ab.vs.FRT | AbSCRIB.vs.FRT | Alignments                       |
|--------------|-----------|----------------|----------------------------------|
| 1633795_a_at | 0         | 1              | chr2L:10745114-10756316 // 100.0 |
| 1640465_at   | 0         | 1              | chr2L:10744074-10756316 // 100.0 |

CG17754

|              | Ab.vs.FRT | AbSCRIB.vs.FRT | Alignments                    |
|--------------|-----------|----------------|-------------------------------|
| 1628712_at   | 1         | 0              | chrX:9144459-9149853 // 100.0 |
| 1637504_at   | 0         | -1             | chrX:9144459-9149075 // 99.75 |
| 1638327_a_at | -1        | -1             | chrX:9144459-9149853 // 100.0 |

CG17816

|              | Ab.vs.FRT | AbSCRIB.vs.FRT | Alignments                     |
|--------------|-----------|----------------|--------------------------------|
| 1637250_at   | 1         | 0              | chr3R:3683895-3685159 // 100.0 |
| 1638984_s_at | 1         | 0              | chr3R:3686683-3712454 // 99.5  |

CG17834

|              | Ab.vs.FRT | AbSCRIB.vs.FRT | Alignments                     |
|--------------|-----------|----------------|--------------------------------|
| 1626011_at   | -1        | 0              | chr2L:8535800-8537932 // 100.0 |
| 1630097_s_at | -1        | -1             | chr2L:8529142-8541462 // 100.0 |

CG1969

|              | Ab.vs.FRT | AbSCRIB.vs.FRT | Alignments                       |
|--------------|-----------|----------------|----------------------------------|
| 1626181_at   | 0         | 0              | chr3R:25565814-25566470 // 100.0 |
| 1636543_a_at | -1        | -1             | chr3R:25565814-25566470 // 100.0 |
| 1637778_a_at | 0         | -1             | chr3R:25565565-25567631 // 100.0 |

CG30080

|              | Ab.vs.FRT | AbSCRIB.vs.FRT | Alignments                       |
|--------------|-----------|----------------|----------------------------------|
| 1627759_at   | 0         | -1             | chr2R:11586223-11589199 // 100.0 |
| 1628387_s_at | 0         | -1             | chr2R:11586520-11586658 // 100.0 |

CG31001

|            | Ab.vs.FRT | AbSCRIB.vs.FRT | Alignments                                                                                                               |
|------------|-----------|----------------|--------------------------------------------------------------------------------------------------------------------------|
| 1624737_at | 1         | 1              | chrUextra:5186009-5186854 // 61.07 ///<br>chrUextra:5186109-5186897 // 56.11 ///<br>chr3R:27806689-27808022 // 100.0 /// |

|              |   |   |                                        |
|--------------|---|---|----------------------------------------|
| 1628230_x_at | 1 | 1 | chr3R:27806123-27809152 // 98.8 ///    |
|              |   |   | chr3R:27807843-27810289 // 93.25 ///   |
|              |   |   | chr3R:27805810-27807414 // 75.02 ///   |
|              |   |   | chr3R:27805778-27806610 // 59.79 ///   |
|              |   |   | chrUextra:23175062-23175709 // 46.36   |
|              |   |   | chr3R:27806689-27808022 // 100.0 ///   |
|              |   |   | chr3R:27806123-27809152 // 98.8 ///    |
|              |   |   | chr3R:27807843-27810289 // 93.25 ///   |
|              |   |   | chr3R:27805810-27807414 // 75.02 ///   |
|              |   |   | chr3R:27805778-27806610 // 59.79 ///   |
|              |   |   | chrUextra:5186009-5186854 // 61.07 /// |
|              |   |   | chrUextra:5186109-5186897 // 56.11 /// |
|              |   |   | chrUextra:23175062-23175709 // 46.36   |

CG31012 /// DmadCG31012 /// DsubCG31012

|              | Ab.vs.FRT | AbSCRIB.vs.FRT | Alignments                       |
|--------------|-----------|----------------|----------------------------------|
| 1633711_a_at | -1        | 0              | chr3R:26648194-26652542 // 100.0 |
| 1640850_at   | 1         | 1              | chr3R:26648194-26652542 // 100.0 |

CG31038

|              | Ab.vs.FRT | AbSCRIB.vs.FRT | Alignments                       |
|--------------|-----------|----------------|----------------------------------|
| 1625178_at   | 0         | -1             | chr3R:25702804-25728953 // 100.0 |
| 1632360_s_at | -1        | -1             | chr3R:25702804-25724533 // 100.0 |

CG31688

|              | Ab.vs.FRT | AbSCRIB.vs.FRT | Alignments                           |
|--------------|-----------|----------------|--------------------------------------|
| 1628583_at   | -1        | -1             | chr2L:20429026-20443945 // 100.0 /// |
|              |           |                | chr2L:20451413-20453063 // 51.39     |
| 1635310_s_at | -1        | -1             | chr2L:20429026-20443945 // 100.0 /// |
|              |           |                | chr2L:20451413-20453063 // 51.39     |

CG32141

|              | Ab.vs.FRT | AbSCRIB.vs.FRT | Alignments                       |
|--------------|-----------|----------------|----------------------------------|
| 1629928_a_at | 1         | 1              | chr3L:14196188-14196842 // 100.0 |
| 1641101_at   | 1         | 1              | chr3L:14196533-14197309 // 100.0 |

CG32626

|              | Ab.vs.FRT | AbSCRIB.vs.FRT | Alignments                      |
|--------------|-----------|----------------|---------------------------------|
| 1631487_s_at | 0         | 0              | chrX:13733563-13733803 // 100.0 |
| 1632081_s_at | -1        | -1             | chrX:13737986-13739508 // 100.0 |
| 1636030_s_at | 0         | 1              | chrX:13731635-13732118 // 100.0 |
| 1640932_s_at | 0         | 1              | chrX:13724781-13739863 // 100.0 |

CG32694

|            | Ab.vs.FRT | AbSCRIB.vs.FRT | Alignments                    |
|------------|-----------|----------------|-------------------------------|
| 1634339_at | 0         | 1              | chrX:9883727-9896198 // 100.0 |

|              |   |   |                               |
|--------------|---|---|-------------------------------|
| 1635605_at   | 0 | 0 | chrX:9883727-9895227 // 100.0 |
| 1636772_s_at | 0 | 1 | chrX:9883727-9900918 // 100.0 |

### CG32982

|              | Ab.vs.FRT | AbSCRIB.vs.FRT | Alignments                     |
|--------------|-----------|----------------|--------------------------------|
| 1634315_a_at | 0         | 1              | chr2L:9125750-9163716 // 100.0 |
| 1634406_at   | 0         | 0              | chr2L:9151200-9163727 // 100.0 |
| 1636907_at   | -1        | -1             | chr2L:9133861-9135888 // 100.0 |

### CG33054

|              | Ab.vs.FRT | AbSCRIB.vs.FRT | Alignments                       |
|--------------|-----------|----------------|----------------------------------|
| 1625443_a_at | 1         | 1              | chr3L:21190581-21195978 // 100.0 |
| 1628251_at   | 1         | 1              | chr3L:21190581-21195978 // 100.0 |
| 1637050_at   | 0         | 0              | chr3L:21190510-21191272 // 100.0 |

### CG33057 /// mkg-p

|              | Ab.vs.FRT | AbSCRIB.vs.FRT | Alignments                     |
|--------------|-----------|----------------|--------------------------------|
| 1622892_s_at | 0         | 1              | chr3L:8395406-8398372 // 100.0 |
| 1635157_at   | 1         | 1              | chr3L:8395266-8398372 // 100.0 |

### CG33096

|              | Ab.vs.FRT | AbSCRIB.vs.FRT | Alignments                       |
|--------------|-----------|----------------|----------------------------------|
| 1639117_a_at | -1        | -1             | chr3R:20923363-20925087 // 100.0 |
| 1640060_at   | -1        | -1             | chr3R:20923395-20925087 // 100.0 |

### CG33169

|              | Ab.vs.FRT | AbSCRIB.vs.FRT | Alignments                       |
|--------------|-----------|----------------|----------------------------------|
| 1631473_at   | 1         | 1              | chr3L:22856965-22858309 // 99.6  |
| 1632606_a_at | 0         | 0              | chr3L:22856963-22857596 // 100.0 |
| 1641489_at   | 0         | 1              | chr3L:22856963-22857596 // 100.0 |

### CG33174 /// DmirCG33174

|              | Ab.vs.FRT | AbSCRIB.vs.FRT | Alignments                      |
|--------------|-----------|----------------|---------------------------------|
| 1625176_at   | 0         | -1             | chrX:13677781-13705534 // 100.0 |
| 1627706_a_at | -1        | -1             | chrX:13677781-13699676 // 100.0 |
| 1637006_at   | 0         | 0              | chrX:13677781-13699676 // 100.0 |
| 1640287_s_at | 0         | 0              | chrX:13703397-13705206 // 100.0 |

### CG33960

|            | Ab.vs.FRT | AbSCRIB.vs.FRT | Alignments                       |
|------------|-----------|----------------|----------------------------------|
| 1623684_at | -1        | -1             | chr2R:12310488-12316320 // 100.0 |
| 1635739_at | -1        | -1             | chr2R:12286431-12287015 // 100.0 |

### CG33967

|            | Ab.vs.FRT | AbSCRIB.vs.FRT | Alignments                       |
|------------|-----------|----------------|----------------------------------|
| 1624053_at | 0         | 1              | chr3R:10549028-10549978 // 100.0 |
| 1632884_at | 1         | 1              | chr3R:10524605-10529231 // 100.0 |

CG33993 /// DwilCG33993

|            | Ab.vs.FRT | AbSCRIB.vs.FRT | Alignments                     |
|------------|-----------|----------------|--------------------------------|
| 1628447_at | -1        | -1             | chr3L:5930378-5943755 // 100.0 |
| 1639605_at | -1        | -1             | chr3L:5926869-5927778 // 100.0 |

CG34104

|            | Ab.vs.FRT | AbSCRIB.vs.FRT | Alignments                      |
|------------|-----------|----------------|---------------------------------|
| 1635113_at | 0         | -1             | chrX:10040218-10041405 // 100.0 |
| 1636704_at | 0         | 0              | chrX:9980565-10032744 // 99.85  |
| 1637474_at | 1         | 1              | chrX:9982221-10005780 // 99.3   |

CG34348

|            | Ab.vs.FRT | AbSCRIB.vs.FRT | Alignments                      |
|------------|-----------|----------------|---------------------------------|
| 1626123_at | 1         | 1              | chrX:11234484-11234782 // 100.0 |
| 1626316_at | 1         | 1              | chrX:11237288-11238128 // 100.0 |

CG34360

|            | Ab.vs.FRT | AbSCRIB.vs.FRT | Alignments                     |
|------------|-----------|----------------|--------------------------------|
| 1624009_at | -1        | -1             | chr3R:5701396-5702032 // 100.0 |
| 1629573_at | -1        | -1             | chr3R:5812358-5813521 // 100.0 |
| 1640397_at | -1        | -1             | chr3R:5754637-5769634 // 100.0 |

CG34377

|            | Ab.vs.FRT | AbSCRIB.vs.FRT | Alignments                       |
|------------|-----------|----------------|----------------------------------|
| 1625709_at | 0         | 0              | chr3R:18144055-18144439 // 100.0 |
| 1629892_at | 1         | 1              | chr3R:18137664-18137908 // 100.0 |
| 1633871_at | 1         | 0              | chr3R:18140585-18141527 // 100.0 |

CG34379

|              | Ab.vs.FRT | AbSCRIB.vs.FRT | Alignments                       |
|--------------|-----------|----------------|----------------------------------|
| 1627487_at   | -1        | -1             | chr2R:10213330-10217323 // 100.0 |
| 1629937_a_at | 0         | 0              | chr2R:10219899-10239312 // 100.0 |
| 1630913_at   | 1         | 1              | chr2R:10202834-10203193 // 100.0 |

CG34383

|            | Ab.vs.FRT | AbSCRIB.vs.FRT | Alignments                     |
|------------|-----------|----------------|--------------------------------|
| 1623585_at | -1        | 0              | chr3R:9571396-9573727 // 100.0 |
| 1625511_at | 0         | 0              | chr3R:9582097-9587375 // 100.0 |
| 1627413_at | 1         | 0              | chr3R:9575117-9581360 // 100.0 |
| 1633756_at | 0         | 0              | chr3R:9560232-9561689 // 81.78 |

## CG34398

|            | Ab.vs.FRT | AbSCRIB.vs.FRT | Alignments                     |
|------------|-----------|----------------|--------------------------------|
| 1628538_at | -1        | -1             | chr2L:8915834-8916065 // 100.0 |
| 1635127_at | 1         | 1              | chr2L:8932900-8933084 // 90.2  |
| 1640585_at | 0         | -1             | chr2L:8922471-8931938 // 100.0 |

## CG34417

|              | Ab.vs.FRT | AbSCRIB.vs.FRT | Alignments                    |
|--------------|-----------|----------------|-------------------------------|
| 1628465_a_at | 0         | 0              | chrX:6465955-6483205 // 100.0 |
| 1636450_at   | 1         | 1              | chrX:6474073-6479688 // 99.86 |
| 1638063_at   | -1        | -1             | chrX:6434803-6456481 // 100.0 |

## CG3655

|            | Ab.vs.FRT | AbSCRIB.vs.FRT | Alignments                    |
|------------|-----------|----------------|-------------------------------|
| 1625537_at | 1         | 0              | chrX:967938-976472 // 99.83   |
| 1628031_at | 0         | 0              | chrX:1013723-1036400 // 100.0 |
| 1639872_at | 1         | 0              | chrX:990527-996570 // 100.0   |

## CG3857

|              | Ab.vs.FRT | AbSCRIB.vs.FRT | Alignments                            |
|--------------|-----------|----------------|---------------------------------------|
| 1623351_at   | -1        | -1             | chrX:1832523-1834040 // 100.0         |
| 1638469_s_at | 1         | 1              | chr2RHet:2204719-2212330 // 99.77 /// |
|              |           |                | chr3L:22796867-22804474 // 99.63 ///  |
|              |           |                | chr3L:24265247-24272857 // 99.63 ///  |
|              |           |                | chr3L:23365306-24265765 // 99.81 ///  |
|              |           |                | chr3R:13858554-13866170 // 99.83 ///  |
|              |           |                | chrX:3072555-3080161 // 99.87 ///     |
|              |           |                | chr2L:14984452-14991975 // 100.0 ///  |
|              |           |                | chr2R:2839725-2847248 // 100.0 ///    |
|              |           |                | chr2R:1267561-1275169 // 99.84 ///    |
|              |           |                | chr2R:9615693-9623293 // 99.72 ///    |
|              |           |                | chrU:2246520-2253957 // 97.41 ///     |
|              |           |                | chr3L:23378273-23385891 // 99.8 ///   |
|              |           |                | chr3R:19676834-19684444 // 99.87 ///  |
|              |           |                | chrX:1824624-1832138 // 99.85 ///     |
|              |           |                | chrX:14445731-14453333 // 99.81 ///   |
|              |           |                | chr2L:4661879-4669402 // 100.0 ///    |
|              |           |                | chr2L:19657679-19665288 // 99.88 ///  |
|              |           |                | chr2L:2112167-2119772 // 99.84 ///    |
|              |           |                | chr2L:10592896-10600501 // 99.8 ///   |
|              |           |                | chrU:1442881-1450490 // 99.79         |

## CG40115

|            | Ab.vs.FRT | AbSCRIB.vs.FRT | Alignments                             |
|------------|-----------|----------------|----------------------------------------|
| 1630184_at | 1         | 1              | chrUextra:1674993-1675537 // 96.8 ///  |
|            |           |                | chrUextra:1337447-1337991 // 96.44 /// |
|            |           |                | chrUextra:2559334-2559890 // 96.44 /// |



|              |   |   |                                          |
|--------------|---|---|------------------------------------------|
|              |   |   | chrUextra:2058066-2155830 // 96.44 ///   |
|              |   |   | chrUextra:11472559-11473104 // 94.31 /// |
|              |   |   | chrUextra:14246965-14247518 // 94.84 /// |
|              |   |   | chrUextra:481866-847647 // 94.66 ///     |
|              |   |   | chr3RHet:572203-572767 // 96.8 ///       |
|              |   |   | chr3RHet:1256112-1256676 // 96.8 ///     |
|              |   |   | chrYHet:194512-195048 // 91.28 ///       |
|              |   |   | chrU:7748781-7749342 // 98.93 ///        |
|              |   |   | chrUextra:9061472-9062034 // 99.82 ///   |
|              |   |   | chr2RHet:2266658-2267220 // 99.82 ///    |
|              |   |   | chr2R:2185813-2186358 // 94.48 ///       |
|              |   |   | chrU:295072-295635 // 97.69 ///          |
|              |   |   | chrU:1211900-1212456 // 96.44 ///        |
|              |   |   | chrU:1219672-1220228 // 96.44 ///        |
|              |   |   | chrU:1225448-1226004 // 96.44            |
| 1641245_a_at | 1 | 1 | chr3RHet:572203-572767 // 96.8 ///       |
|              |   |   | chr3RHet:1256112-1256676 // 96.8 ///     |
|              |   |   | chrYHet:194512-195048 // 91.28 ///       |
|              |   |   | chrU:7748781-7749342 // 98.93 ///        |
|              |   |   | chrUextra:1674993-1675537 // 96.8 ///    |
|              |   |   | chrUextra:1337447-1337991 // 96.44 ///   |
|              |   |   | chrUextra:2559334-2559890 // 96.44 ///   |
|              |   |   | chrUextra:2058066-2155830 // 96.44 ///   |
|              |   |   | chrUextra:11472559-11473104 // 94.31 /// |
|              |   |   | chrUextra:14246965-14247518 // 94.84 /// |
|              |   |   | chrUextra:481866-847647 // 94.66 ///     |
|              |   |   | chr2RHet:2266658-2267220 // 99.82 ///    |
|              |   |   | chr2R:2185813-2186358 // 94.48 ///       |
|              |   |   | chrU:295072-295635 // 97.69 ///          |
|              |   |   | chrU:1211900-1212456 // 96.44 ///        |
|              |   |   | chrU:1219672-1220228 // 96.44 ///        |
|              |   |   | chrU:1225448-1226004 // 96.44 ///        |
|              |   |   | chrUextra:9061472-9062034 // 99.82       |

CG41284

|              |           |                |                                       |
|--------------|-----------|----------------|---------------------------------------|
|              | Ab.vs.FRT | AbSCRIB.vs.FRT | Alignments                            |
| 1634671_a_at | 1         | 1              | chr3LHet:1703266-1703515 // 100.0 /// |
|              |           |                | chr3LHet:1652596-1652845 // 99.6      |
| 1637236_at   | 1         | 0              | chr3LHet:1702041-1703582 // 100.0 /// |
|              |           |                | chr3LHet:1646351-1652912 // 99.75     |

CG42232

|              |           |                |                                  |
|--------------|-----------|----------------|----------------------------------|
|              | Ab.vs.FRT | AbSCRIB.vs.FRT | Alignments                       |
| 1635452_a_at | 0         | 0              | chr3R:12292740-12295350 // 100.0 |
| 1636205_at   | -1        | 0              | chr3R:12284001-12288309 // 100.0 |
| 1640737_at   | 1         | 1              | chr3R:12290226-12295342 // 100.0 |

CG42271

|  |           |                |            |
|--|-----------|----------------|------------|
|  | Ab.vs.FRT | AbSCRIB.vs.FRT | Alignments |
|--|-----------|----------------|------------|

|            |    |   |                                 |
|------------|----|---|---------------------------------|
| 1632756_at | -1 | 0 | chrX:14122267-14128085 // 100.0 |
| 1641372_at | 1  | 1 | chrX:14126314-14128085 // 100.0 |

#### CG42327

|            | Ab.vs.FRT | AbSCRIB.vs.FRT | Alignments                     |
|------------|-----------|----------------|--------------------------------|
| 1629723_at | -1        | 0              | chr3R:7498039-7499184 // 100.0 |
| 1633732_at | -1        | -1             | chr3R:7493326-7496707 // 100.0 |

#### CG42336

|              | Ab.vs.FRT | AbSCRIB.vs.FRT | Alignments                     |
|--------------|-----------|----------------|--------------------------------|
| 1629625_at   | 0         | 1              | chr2R:7182048-7184980 // 100.0 |
| 1633547_a_at | 1         | 1              | chr2R:7182048-7184980 // 100.0 |
| 1633572_at   | 0         | 0              | chr2R:7182903-7183317 // 100.0 |
| 1638448_at   | 0         | 0              | chr2R:7182048-7182859 // 100.0 |

#### CG42342

|            | Ab.vs.FRT | AbSCRIB.vs.FRT | Alignments                       |
|------------|-----------|----------------|----------------------------------|
| 1631471_at | -1        | -1             | chr3R:12381876-12394335 // 100.0 |
| 1633321_at | -1        | -1             | chr3R:12339171-12339918 // 100.0 |
| 1635779_at | -1        | -1             | chr3R:12375758-12378280 // 100.0 |
| 1639558_at | 0         | 0              | chr3R:12394665-12396133 // 100.0 |

#### CG4655

|              | Ab.vs.FRT | AbSCRIB.vs.FRT | Alignments                     |
|--------------|-----------|----------------|--------------------------------|
| 1626639_a_at | 0         | 0              | chr3R:6663114-6667710 // 100.0 |
| 1628333_at   | -1        | -1             | chr3R:6665789-6667768 // 99.75 |
| 1638442_at   | -1        | -1             | chr3R:6663114-6667710 // 100.0 |

#### CG4662

|              | Ab.vs.FRT | AbSCRIB.vs.FRT | Alignments                       |
|--------------|-----------|----------------|----------------------------------|
| 1626421_at   | 0         | 1              | chr3R:15673044-15678698 // 100.0 |
| 1627462_a_at | 0         | 0              | chr3R:15673044-15678698 // 100.0 |
| 1635307_at   | 1         | 1              | chr3R:15673044-15680125 // 100.0 |

#### CG5091 /// CG5096

|              | Ab.vs.FRT | AbSCRIB.vs.FRT | Alignments                       |
|--------------|-----------|----------------|----------------------------------|
| 1636630_s_at | 0         | 1              | chr2L:10380117-10382865 // 100.0 |
| 1639478_at   | 1         | 1              | chr2L:10382252-10384730 // 100.0 |

#### CG5174

|              | Ab.vs.FRT | AbSCRIB.vs.FRT | Alignments                       |
|--------------|-----------|----------------|----------------------------------|
| 1623053_a_at | -1        | 0              | chr2R:14308914-14313515 // 100.0 |
| 1624146_at   | 0         | 0              | chr2R:14308914-14312388 // 100.0 |
| 1634112_a_at | -1        | -1             | chr2R:14310438-14313433 // 100.0 |
| 1640233_at   | 0         | 0              | chr2R:14310438-14313433 // 100.0 |

|              |           |                |                                  |
|--------------|-----------|----------------|----------------------------------|
| CG5325       |           |                |                                  |
|              | Ab.vs.FRT | AbSCRIB.vs.FRT | Alignments                       |
| 1626588_a_at | -1        | -1             | chr2L:12093770-12094635 // 100.0 |
| 1639148_at   | -1        | -1             | chr2L:12093770-12095252 // 100.0 |

|              |           |                |                                  |
|--------------|-----------|----------------|----------------------------------|
| CG5326       |           |                |                                  |
|              | Ab.vs.FRT | AbSCRIB.vs.FRT | Alignments                       |
| 1623589_a_at | -1        | 0              | chr3R:18359027-18365639 // 100.0 |
| 1629511_at   | 1         | 1              | chr3R:18357893-18365639 // 100.0 |

|              |           |                |                                  |
|--------------|-----------|----------------|----------------------------------|
| CG6000       |           |                |                                  |
|              | Ab.vs.FRT | AbSCRIB.vs.FRT | Alignments                       |
| 1625179_at   | 1         | 1              | chr3R:19880234-19880822 // 100.0 |
| 1631899_a_at | 1         | 0              | chr3R:19880139-19880822 // 100.0 |

|              |           |                |                                 |
|--------------|-----------|----------------|---------------------------------|
| CG6340       |           |                |                                 |
|              | Ab.vs.FRT | AbSCRIB.vs.FRT | Alignments                      |
| 1631096_a_at | 1         | 1              | chrX:15376399-15378755 // 100.0 |
| 1632665_a_at | -1        | -1             | chrX:15376409-15380642 // 100.0 |
| 1633367_at   | 0         | 0              | chrX:15376399-15378755 // 100.0 |
| 1634931_at   | 1         | 1              | chrX:15376409-15378413 // 100.0 |

|              |           |                |                                |
|--------------|-----------|----------------|--------------------------------|
| CG6791       |           |                |                                |
|              | Ab.vs.FRT | AbSCRIB.vs.FRT | Alignments                     |
| 1629690_at   | -1        | -1             | chr3R:7411419-7415864 // 100.0 |
| 1635430_a_at | -1        | -1             | chr3R:7411075-7415864 // 100.0 |
| 1639787_at   | 0         | 0              | chr3R:7411075-7415864 // 100.0 |

|              |           |                |                                  |
|--------------|-----------|----------------|----------------------------------|
| CG6854       |           |                |                                  |
|              | Ab.vs.FRT | AbSCRIB.vs.FRT | Alignments                       |
| 1633318_at   | 0         | 0              | chr3L:15097848-15098997 // 100.0 |
| 1639986_at   | 1         | 0              | chr3L:15098983-15103837 // 100.0 |
| 1640191_a_at | -1        | -1             | chr3L:15091236-15106074 // 99.79 |

|            |           |                |                                  |
|------------|-----------|----------------|----------------------------------|
| CG6982     |           |                |                                  |
|            | Ab.vs.FRT | AbSCRIB.vs.FRT | Alignments                       |
| 1625880_at | 1         | 1              | chr3R:18552702-18554721 // 98.96 |
| 1630752_at | -1        | 0              | chr3R:18554739-18555829 // 100.0 |

|              |           |                |                                  |
|--------------|-----------|----------------|----------------------------------|
| CG7630       |           |                |                                  |
|              | Ab.vs.FRT | AbSCRIB.vs.FRT | Alignments                       |
| 1627402_a_at | -1        | -1             | chr3L:17418587-17419387 // 100.0 |
| 1632440_at   | -1        | 0              | chr3L:17418587-17419387 // 100.0 |

|              |           |                |                                  |
|--------------|-----------|----------------|----------------------------------|
| CG7650       |           |                |                                  |
|              | Ab.vs.FRT | AbSCRIB.vs.FRT | Alignments                       |
| 1627214_s_at | -1        | -1             | chr3L:15602435-15603463 // 100.0 |
| 1633191_at   | -1        | -1             | chr3L:15602435-15603463 // 100.0 |
| 1633616_at   | -1        | -1             | chr3L:15602553-15603488 // 100.0 |

|              |           |                |                                |
|--------------|-----------|----------------|--------------------------------|
| CG7777       |           |                |                                |
|              | Ab.vs.FRT | AbSCRIB.vs.FRT | Alignments                     |
| 1625950_a_at | 0         | -1             | chr2R:7323750-7329728 // 100.0 |
| 1630030_at   | 1         | 0              | chr2R:7323750-7329728 // 100.0 |

|              |           |                |                                |
|--------------|-----------|----------------|--------------------------------|
| CG8086       |           |                |                                |
|              | Ab.vs.FRT | AbSCRIB.vs.FRT | Alignments                     |
| 1623894_a_at | 0         | 1              | chr2L:8244544-8257502 // 100.0 |
| 1635348_at   | 0         | 1              | chr2L:8245372-8250357 // 100.0 |

|              |           |                |                                  |
|--------------|-----------|----------------|----------------------------------|
| CG8765       |           |                |                                  |
|              | Ab.vs.FRT | AbSCRIB.vs.FRT | Alignments                       |
| 1627570_a_at | -1        | 0              | chr3L:19679550-19680459 // 100.0 |
| 1634934_at   | -1        | -1             | chr3L:19677037-19680459 // 100.0 |

|              |           |                |                                |
|--------------|-----------|----------------|--------------------------------|
| CG9027       |           |                |                                |
|              | Ab.vs.FRT | AbSCRIB.vs.FRT | Alignments                     |
| 1622906_at   | 0         | -1             | chr2R:7268044-7268717 // 100.0 |
| 1636961_a_at | -1        | -1             | chr2R:7268821-7271613 // 100.0 |

|              |           |                |                                |
|--------------|-----------|----------------|--------------------------------|
| CG9062       |           |                |                                |
|              | Ab.vs.FRT | AbSCRIB.vs.FRT | Alignments                     |
| 1624010_a_at | 0         | -1             | chr2R:7168484-7171461 // 100.0 |
| 1634001_at   | -1        | -1             | chr2R:7168484-7171461 // 100.0 |

|              |           |                |                                  |
|--------------|-----------|----------------|----------------------------------|
| CG9449       |           |                |                                  |
|              | Ab.vs.FRT | AbSCRIB.vs.FRT | Alignments                       |
| 1628150_a_at | 1         | 1              | chr3L:19486535-19489801 // 100.0 |
| 1633200_at   | 1         | 1              | chr3L:19485515-19489791 // 100.0 |

|              |           |                |                                  |
|--------------|-----------|----------------|----------------------------------|
| CG9932       |           |                |                                  |
|              | Ab.vs.FRT | AbSCRIB.vs.FRT | Alignments                       |
| 1638653_a_at | 1         | 1              | chr2L:13022670-13031333 // 100.0 |
| 1640518_at   | 0         | 1              | chr2L:13035355-13065175 // 100.0 |

chinmo

|              | Ab.vs.FRT | AbSCRIB.vs.FRT | Alignments                     |
|--------------|-----------|----------------|--------------------------------|
| 1628005_at   | 1         | 1              | chr2L:1667846-1698617 // 99.76 |
| 1629484_s_at | 1         | 1              | chr2L:1653260-1697851 // 99.89 |
| 1636985_s_at | 1         | 1              | chr2L:1667846-1678921 // 100.0 |

#### cpo

|              | Ab.vs.FRT | AbSCRIB.vs.FRT | Alignments                       |
|--------------|-----------|----------------|----------------------------------|
| 1624608_s_at | 0         | -1             | chr3R:13838879-13839188 // 100.0 |
| 1632644_s_at | -1        | -1             | chr3R:13757594-13841501 // 99.76 |
| 1639802_at   | 0         | 0              | chr3R:13762983-13764042 // 100.0 |

#### dlg1

|              | Ab.vs.FRT | AbSCRIB.vs.FRT | Alignments                      |
|--------------|-----------|----------------|---------------------------------|
| 1624021_a_at | 1         | 1              | chrX:11283726-11301780 // 100.0 |
| 1627882_at   | 0         | 0              | chrX:11263669-11283324 // 100.0 |
| 1635382_at   | 0         | 0              | chrX:11269795-11296894 // 99.3  |
| 1640119_a_at | 1         | 0              | chrX:11269795-11296894 // 99.3  |

#### Dll

|              | Ab.vs.FRT | AbSCRIB.vs.FRT | Alignments                       |
|--------------|-----------|----------------|----------------------------------|
| 1625771_at   | 0         | -1             | chr2R:20702352-20722125 // 100.0 |
| 1630237_a_at | 1         | 0              | chr2R:20702352-20722125 // 100.0 |
| 1636088_at   | 1         | 1              | chr2R:20702352-20722686 // 100.0 |

#### DnaJ-60

|              | Ab.vs.FRT | AbSCRIB.vs.FRT | Alignments                       |
|--------------|-----------|----------------|----------------------------------|
| 1623119_at   | 0         | 0              | chr2R:20045188-20046819 // 100.0 |
| 1633399_at   | 1         | 1              | chr2R:20045837-20046819 // 100.0 |
| 1636379_a_at | 1         | 1              | chr2R:20045837-20046819 // 100.0 |

#### dom

|              | Ab.vs.FRT | AbSCRIB.vs.FRT | Alignments                       |
|--------------|-----------|----------------|----------------------------------|
| 1628160_a_at | -1        | -1             | chr2R:17210948-17229346 // 100.0 |
| 1633331_at   | 0         | -1             | chr2R:17210948-17224453 // 100.0 |
| 1636034_at   | -1        | -1             | chr2R:17210948-17229346 // 100.0 |

#### dsx

|              | Ab.vs.FRT | AbSCRIB.vs.FRT | Alignments                     |
|--------------|-----------|----------------|--------------------------------|
| 1623776_s_at | 0         | -1             | chr3R:3760203-3793130 // 99.89 |
| 1640799_at   | 1         | 1              | chr3R:3750044-3793130 // 100.0 |

#### ec

|            | Ab.vs.FRT | AbSCRIB.vs.FRT | Alignments                    |
|------------|-----------|----------------|-------------------------------|
| 1626919_at | 0         | 0              | chrX:3713180-3715204 // 96.22 |
| 1629348_at | 1         | 0              | chrX:3730696-3735750 // 100.0 |

1631485\_a\_at -1 -1 chrX:3744315-3750618 // 100.0

Ect4

|              | Ab.vs.FRT | AbSCRIB.vs.FRT | Alignments                     |
|--------------|-----------|----------------|--------------------------------|
| 1623244_at   | 0         | 1              | chr3L:8094137-8101606 // 100.0 |
| 1624876_at   | 0         | 0              | chr3L:8086158-8086587 // 100.0 |
| 1629571_at   | 0         | 0              | chr3L:8067574-8068340 // 100.0 |
| 1631613_at   | 0         | 0              | chr3L:8089646-8092739 // 100.0 |
| 1632067_at   | 1         | 1              | chr3L:8094137-8101938 // 100.0 |
| 1635126_a_at | 0         | 1              | chr3L:8094137-8101938 // 100.0 |

egh

|              | Ab.vs.FRT | AbSCRIB.vs.FRT | Alignments                    |
|--------------|-----------|----------------|-------------------------------|
| 1631621_s_at | 1         | 1              | chrX:2482596-2490218 // 99.72 |
| 1634558_s_at | 0         | 1              | chrX:2482533-2492638 // 100.0 |

egr

|            | Ab.vs.FRT | AbSCRIB.vs.FRT | Alignments                     |
|------------|-----------|----------------|--------------------------------|
| 1629442_at | -1        | -1             | chr2R:5966516-5969137 // 100.0 |
| 1639671_at | -1        | -1             | chr2R:5970119-5971666 // 100.0 |

eIF-4B

|              | Ab.vs.FRT | AbSCRIB.vs.FRT | Alignments                        |
|--------------|-----------|----------------|-----------------------------------|
| 1629261_at   | 1         | 1              | chr2RHet:2901815-2902500 // 100.0 |
| 1636358_a_at | -1        | -1             | chr2RHet:2901815-2902500 // 100.0 |
| 1640194_a_at | 1         | 1              | chr2RHet:2901751-2917318 // 100.0 |
| 1640653_at   | 1         | 0              | chr2RHet:2901751-2917318 // 100.0 |

Eip75B

|              | Ab.vs.FRT | AbSCRIB.vs.FRT | Alignments                       |
|--------------|-----------|----------------|----------------------------------|
| 1623164_a_at | -1        | -1             | chr3L:17946457-18052698 // 100.0 |
| 1635393_s_at | -1        | -1             | chr3L:17946097-17946705 // 100.0 |
| 1640781_a_at | -1        | -1             | chr3L:17945062-17992921 // 100.0 |

elB

|              | Ab.vs.FRT | AbSCRIB.vs.FRT | Alignments                       |
|--------------|-----------|----------------|----------------------------------|
| 1623877_a_at | -1        | -1             | chr2L:14391177-14407758 // 100.0 |
| 1631207_at   | -1        | -1             | chr2L:14391177-14407758 // 100.0 |
| 1640000_at   | 0         | 0              | chr2L:14387121-14407758 // 100.0 |

Fancd2

|            | Ab.vs.FRT | AbSCRIB.vs.FRT | Alignments                       |
|------------|-----------|----------------|----------------------------------|
| 1629311_at | -1        | 0              | chr3R:16640912-16641815 // 100.0 |
| 1640096_at | 0         | 1              | chr3R:16636525-16640799 // 100.0 |

### Fas3

|              | Ab.vs.FRT | AbSCRIB.vs.FRT | Alignments                       |
|--------------|-----------|----------------|----------------------------------|
| 1628543_a_at | 0         | -1             | chr2L:18320100-18392575 // 99.29 |
| 1641473_at   | 1         | 0              | chr2L:18320100-18392575 // 99.4  |

### fau

|              | Ab.vs.FRT | AbSCRIB.vs.FRT | Alignments                     |
|--------------|-----------|----------------|--------------------------------|
| 1628880_at   | 0         | 0              | chr3R:6598399-6603083 // 100.0 |
| 1630161_at   | 0         | 0              | chr3R:6600265-6603083 // 100.0 |
| 1633459_a_at | 0         | -1             | chr3R:6599253-6603083 // 100.0 |
| 1638789_at   | 0         | -1             | chr3R:6599253-6603083 // 100.0 |
| 1640350_at   | 0         | 0              | chr3R:6593938-6603083 // 100.0 |

### Fili

|            | Ab.vs.FRT | AbSCRIB.vs.FRT | Alignments                       |
|------------|-----------|----------------|----------------------------------|
| 1626772_at | -1        | -1             | chr2R:17817024-17818166 // 100.0 |
| 1628113_at | -1        | -1             | chr2R:17830450-17831981 // 100.0 |
| 1631503_at | 0         | 0              | chr2R:17771005-17813856 // 100.0 |

### Fmr1

|              | Ab.vs.FRT | AbSCRIB.vs.FRT | Alignments                     |
|--------------|-----------|----------------|--------------------------------|
| 1632612_s_at | -1        | -1             | chr3R:5929821-5935844 // 100.0 |
| 1634028_s_at | 1         | 1              | chr3R:5927135-5935843 // 100.0 |

### fru

|              | Ab.vs.FRT | AbSCRIB.vs.FRT | Alignments                       |
|--------------|-----------|----------------|----------------------------------|
| 1624575_a_at | 0         | 0              | chr3R:14248359-14371244 // 100.0 |
| 1629904_at   | 0         | 1              | chr3R:14256948-14261513 // 100.0 |
| 1631498_a_at | 1         | 1              | chr3R:14251664-14371244 // 99.86 |
| 1632859_a_at | -1        | -1             | chr3R:14242314-14371244 // 100.0 |
| 1634379_a_at | -1        | -1             | chr3R:14256429-14261513 // 100.0 |
| 1638111_at   | 0         | 0              | chr3R:14371199-14371631 // 100.0 |
| 1641338_at   | 0         | 1              | chr3R:14256429-14261513 // 100.0 |

### Galpha49B

|              | Ab.vs.FRT | AbSCRIB.vs.FRT | Alignments                     |
|--------------|-----------|----------------|--------------------------------|
| 1624798_s_at | 1         | 0              | chr2R:8500245-8507806 // 100.0 |
| 1639773_s_at | 1         | 1              | chr2R:8503292-8506485 // 100.0 |

### Gapdh2

|              | Ab.vs.FRT | AbSCRIB.vs.FRT | Alignments                      |
|--------------|-----------|----------------|---------------------------------|
| 1627915_a_at | 0         | -1             | chrX:15762222-15763695 // 100.0 |
| 1632667_s_at | -1        | -1             | chrX:15762335-15763662 // 100.0 |

garz

|              | Ab.vs.FRT | AbSCRIB.vs.FRT | Alignments                     |
|--------------|-----------|----------------|--------------------------------|
| 1626339_at   | 1         | 1              | chr2R:8214178-8221327 // 100.0 |
| 1636686_at   | 0         | 0              | chr2R:8214178-8219975 // 100.0 |
| 1639361_a_at | 0         | -1             | chr2R:8214178-8219975 // 100.0 |

Gfat1

|              | Ab.vs.FRT | AbSCRIB.vs.FRT | Alignments                                                                                                                                                                                                                       |
|--------------|-----------|----------------|----------------------------------------------------------------------------------------------------------------------------------------------------------------------------------------------------------------------------------|
| 1634707_s_at | -1        | -1             | chr3RHet:2474288-2481648 // 100.0                                                                                                                                                                                                |
| 1635696_s_at | 1         | 1              | chr2LHet:330880-337332 // 99.4 ///<br>chr3RHet:2458022-2464475 // 99.63 ///<br>chr3RHet:2463977-2470430 // 99.63 ///<br>chr3L:21365875-21372325 // 100.0 ///<br>chr4:34274-40712 // 99.32 ///<br>chr3LHet:336972-343625 // 95.57 |

Glut1

|              | Ab.vs.FRT | AbSCRIB.vs.FRT | Alignments                   |
|--------------|-----------|----------------|------------------------------|
| 1628757_at   | 0         | -1             | chr3L:914073-982582 // 99.41 |
| 1634033_s_at | 0         | -1             | chr3L:959661-984440 // 100.0 |

Gpdh

|              | Ab.vs.FRT | AbSCRIB.vs.FRT | Alignments                     |
|--------------|-----------|----------------|--------------------------------|
| 1616608_a_at | -1        | -1             | chr2L:5943681-5948313 // 100.0 |
| 1625949_at   | 0         | 0              | chr2L:5943681-5948313 // 100.0 |
| 1634893_at   | 0         | 0              | chr2L:5943681-5949092 // 100.0 |
| 1636311_at   | -1        | -1             | chr2L:5943681-5947625 // 100.0 |

grp

|              | Ab.vs.FRT | AbSCRIB.vs.FRT | Alignments                       |
|--------------|-----------|----------------|----------------------------------|
| 1625416_x_at | 1         | 1              | chr2L:16685836-16687059 // 100.0 |
| 1629880_at   | 1         | 1              | chr2L:16685836-16687059 // 100.0 |
| 1634230_s_at | 0         | 0              | chr2L:16680087-16699926 // 100.0 |

GV1

|              | Ab.vs.FRT | AbSCRIB.vs.FRT | Alignments                     |
|--------------|-----------|----------------|--------------------------------|
| 1626287_at   | 1         | 1              | chr3L:1810588-1822903 // 100.0 |
| 1631252_a_at | 0         | 0              | chr3L:1810588-1822220 // 100.0 |
| 1635266_at   | 1         | 1              | chr3L:1810588-1822220 // 100.0 |

His1:CG31617 /// His1:CG33801 /// His1:CG33804 /// His1:CG33807 /// His1:CG33810 ///  
His1:CG33813 /// His1:CG33816 /// His1:CG33819 /// His1:CG33822 /// His1:CG33825 ///  
His1:CG33828 /// His1:CG33831 /// His1:CG33834 /// His1:CG33837 /// His1:CG33840 ///  
His1:CG33843 /// His1:CG33846 /// His1:CG33849 /// His1:CG33852 /// His1:CG33855 ///  
His1:CG33858 /// His1:CG33861 /// His1:CG33864

Ab.vs.FRT AbSCRIB.vs.FRT Alignments



|              |   |   |                                                                                                                                                                                                                                                                                                                                                                                                                                                                                                                                                                                                                                                                                                                                                                                                                                              |
|--------------|---|---|----------------------------------------------------------------------------------------------------------------------------------------------------------------------------------------------------------------------------------------------------------------------------------------------------------------------------------------------------------------------------------------------------------------------------------------------------------------------------------------------------------------------------------------------------------------------------------------------------------------------------------------------------------------------------------------------------------------------------------------------------------------------------------------------------------------------------------------------|
| 1629740_at   | 1 | 1 | chrUextra:10958515-11389945 // 100.0 ///<br>chrUextra:17519559-17974119 // 99.89 ///<br>chrUextra:10798897-11720181 // 99.89 ///<br>chr2L:21456232-21457110 // 100.0 ///<br>chr2L:21421974-21422852 // 99.89 ///<br>chr2L:21437130-21438008 // 99.89 ///<br>chr2L:21451171-21452049 // 99.89 ///<br>chr2L:21461292-21462170 // 99.89 ///<br>chr2L:21466335-21467213 // 99.89 ///<br>chr2L:21471378-21472256 // 99.89 ///<br>chr2L:21476421-21477299 // 99.89 ///<br>chr2L:21481464-21482342 // 99.89 ///<br>chr2L:21491660-21492538 // 99.89 ///<br>chr2L:21496705-21497583 // 99.89 ///<br>chr2L:21501752-21502630 // 99.89 ///<br>chr2L:21506803-21507681 // 99.89 ///<br>chr2L:21511847-21512725 // 99.89 ///<br>chr2L:21536465-21537343 // 99.89 ///<br>chrUextra:16984316-17104264 // 100.0 ///<br>chrUextra:10801500-10986150 // 99.77 |
| 1631321_s_at | 1 | 1 | chrUextra:10958515-11029897 // 97.1 ///<br>chrUextra:18013913-18251413 // 96.96 ///<br>chrUextra:17519559-17973946 // 96.96 ///<br>chrUextra:10798897-11389772 // 97.1 ///<br>chr2L:21542983-21543706 // 100.0 ///<br>chr2L:21437130-21437835 // 97.1 ///<br>chr2L:21456232-21456937 // 97.1 ///<br>chr2L:21461292-21461997 // 97.1 ///<br>chr2L:21466335-21467040 // 97.1 ///<br>chr2L:21471378-21472083 // 97.1 ///<br>chr2L:21476421-21477126 // 97.1 ///<br>chr2L:21481464-21482169 // 97.1 ///<br>chr2L:21521735-21522440 // 97.1 ///<br>chr2L:21526578-21527283 // 97.1 ///<br>chr2L:21531421-21532126 // 97.1 ///<br>chr2L:21421974-21422679 // 96.96 ///<br>chr2L:21427035-21427740 // 96.96 ///<br>chr2L:21451171-21451876 // 96.96 ///<br>chrUextra:12271498-12279438 // 97.1 ///<br>chrUextra:16984489-17104264 // 97.1           |

His3:CG31613 /// His3:CG33803 /// His3:CG33806 /// His3:CG33809 /// His3:CG33812 ///  
His3:CG33815 /// His3:CG33818 /// His3:CG33821 /// His3:CG33824 /// His3:CG33827 ///  
His3:CG33830 /// His3:CG33833 /// His3:CG33836 /// His3:CG33839 /// His3:CG33842 ///  
His3:CG33845 /// His3:CG33848 /// His3:CG33851 /// His3:CG33854 /// His3:CG33857 ///  
His3:CG33860 /// His3:CG33863 /// His3:CG33866

|            | Ab.vs.FRT | AbSCRIB.vs.FRT | Alignments                                                                                                                                                                                           |
|------------|-----------|----------------|------------------------------------------------------------------------------------------------------------------------------------------------------------------------------------------------------|
| 1626867_at | -1        | 0              | chr2L:21420185-21420596 // 100.0 ///<br>chr2L:21425249-21425660 // 100.0 ///<br>chr2L:21430311-21430722 // 100.0 ///<br>chr2L:21435355-21435766 // 100.0 ///<br>chr2L:21440243-21440654 // 100.0 /// |

|              |    |   |                                          |
|--------------|----|---|------------------------------------------|
|              |    |   | chr2L:21454444-21454855 // 100.0 ///     |
|              |    |   | chr2L:21484737-21485148 // 100.0 ///     |
|              |    |   | chr2L:21489886-21490297 // 100.0 ///     |
|              |    |   | chr2L:21494931-21495342 // 100.0 ///     |
|              |    |   | chr2L:21499976-21500387 // 100.0 ///     |
|              |    |   | chr2L:21505029-21505440 // 100.0 ///     |
|              |    |   | chr2L:21510074-21510485 // 100.0 ///     |
|              |    |   | chr2L:21515118-21515529 // 100.0 ///     |
|              |    |   | chr2L:21520165-21520576 // 100.0 ///     |
|              |    |   | chr2L:21525008-21525419 // 100.0 ///     |
|              |    |   | chr2L:21529851-21530262 // 100.0 ///     |
|              |    |   | chrUextra:1208196-1208607 // 100.0 ///   |
|              |    |   | chrUextra:7733671-7734082 // 100.0 ///   |
|              |    |   | chrUextra:7958547-7958958 // 100.0 ///   |
|              |    |   | chrUextra:9788102-9788513 // 100.0       |
| 1638308_s_at | -1 | 0 | chrUextra:1208196-1208607 // 100.0 ///   |
|              |    |   | chrUextra:7733671-7734082 // 100.0 ///   |
|              |    |   | chrUextra:7958547-7958958 // 100.0 ///   |
|              |    |   | chrUextra:9788102-9788513 // 100.0 ///   |
|              |    |   | chrUextra:10534527-10534938 // 100.0 /// |
|              |    |   | chrUextra:12095133-12095544 // 100.0 /// |
|              |    |   | chrUextra:12188206-12188617 // 100.0 /// |
|              |    |   | chrUextra:13391895-13392306 // 100.0 /// |
|              |    |   | chrUextra:17944964-17945375 // 100.0 /// |
|              |    |   | chrUextra:19464124-19464535 // 100.0 /// |
|              |    |   | chrUextra:9266712-9403271 // 100.0 ///   |
|              |    |   | chr2L:21420185-21420596 // 100.0 ///     |
|              |    |   | chr2L:21425249-21425660 // 100.0 ///     |
|              |    |   | chr2L:21430311-21430722 // 100.0 ///     |
|              |    |   | chr2L:21435355-21435766 // 100.0 ///     |
|              |    |   | chr2L:21440243-21440654 // 100.0 ///     |
|              |    |   | chr2L:21454444-21454855 // 100.0 ///     |
|              |    |   | chrUextra:8670477-8670888 // 100.0 ///   |
|              |    |   | chrUextra:10813270-10813681 // 100.0 /// |
|              |    |   | chrUextra:10937176-10937587 // 100.0     |

### Hrb98DE

|              | Ab.vs.FRT | AbSCRIB.vs.FRT | Alignments                       |
|--------------|-----------|----------------|----------------------------------|
| 1638912_s_at | 1         | 1              | chr3R:24426108-24431499 // 100.0 |
| 1640169_s_at | 0         | -1             | chr3R:24425528-24430817 // 100.0 |

### Hsp67Bb

|              | Ab.vs.FRT | AbSCRIB.vs.FRT | Alignments                     |
|--------------|-----------|----------------|--------------------------------|
| 1629061_s_at | -1        | -1             | chr3L:9366030-9368070 // 100.0 |
| 1630487_s_at | 0         | -1             | chr3L:9366030-9366749 // 100.0 |

### hts

|              | Ab.vs.FRT | AbSCRIB.vs.FRT | Alignments                       |
|--------------|-----------|----------------|----------------------------------|
| 1632191_s_at | -1        | -1             | chr2R:15294404-15312454 // 100.0 |
| 1633226_at   | 0         | 0              | chr2R:15296359-15312454 // 100.0 |

|              |   |   |                                  |
|--------------|---|---|----------------------------------|
| 1634736_at   | 0 | 0 | chr2R:15287021-15312454 // 100.0 |
| 1634962_s_at | 0 | 0 | chr2R:15284839-15312454 // 100.0 |
| 1641531_at   | 1 | 1 | chr2R:15294404-15312454 // 100.0 |

### Idgf3

|              | Ab.vs.FRT | AbSCRIB.vs.FRT | Alignments                       |
|--------------|-----------|----------------|----------------------------------|
| 1623643_s_at | 1         | 1              | chr2L:16451070-16453176 // 100.0 |
| 1626301_at   | 1         | 1              | chr2L:16451070-16453176 // 100.0 |

### ImpE1

|              | Ab.vs.FRT | AbSCRIB.vs.FRT | Alignments                     |
|--------------|-----------|----------------|--------------------------------|
| 1625625_at   | 0         | -1             | chr3L:8365508-8384271 // 99.83 |
| 1631375_a_at | 0         | -1             | chr3L:8365508-8373250 // 100.0 |
| 1634617_at   | 0         | 0              | chr3L:8363024-8365524 // 100.0 |
| 1634661_at   | 0         | -1             | chr3L:8365508-8373250 // 100.0 |

### jing

|              | Ab.vs.FRT | AbSCRIB.vs.FRT | Alignments                     |
|--------------|-----------|----------------|--------------------------------|
| 1628528_at   | 1         | 1              | chr2R:2390272-2391223 // 100.0 |
| 1636066_s_at | -1        | -1             | chr2R:2501283-2506901 // 100.0 |

### l(1)G0196

|              | Ab.vs.FRT | AbSCRIB.vs.FRT | Alignments                      |
|--------------|-----------|----------------|---------------------------------|
| 1624265_at   | 0         | 0              | chrX:21889018-21909287 // 100.0 |
| 1625785_at   | 0         | 0              | chrX:21889018-21905765 // 100.0 |
| 1632658_a_at | 0         | 1              | chrX:21889018-21904734 // 100.0 |
| 1633081_at   | 0         | 0              | chrX:21889018-21906262 // 100.0 |
| 1641542_at   | 0         | 1              | chrX:21889018-21904734 // 100.0 |

### l(2)efl

|              | Ab.vs.FRT | AbSCRIB.vs.FRT | Alignments                       |
|--------------|-----------|----------------|----------------------------------|
| 1626416_a_at | 0         | -1             | chr2R:19572320-19573044 // 100.0 |
| 1627242_at   | 0         | -1             | chr2R:19572173-19573063 // 100.0 |
| 1635952_at   | 0         | 0              | chr2R:19572320-19573044 // 100.0 |

### lilli

|              | Ab.vs.FRT | AbSCRIB.vs.FRT | Alignments                     |
|--------------|-----------|----------------|--------------------------------|
| 1623171_s_at | 1         | 1              | chr2L:2885951-2945194 // 99.8  |
| 1635264_s_at | 1         | 0              | chr2L:2885951-2952597 // 100.0 |

### Lim1

|              | Ab.vs.FRT | AbSCRIB.vs.FRT | Alignments                    |
|--------------|-----------|----------------|-------------------------------|
| 1629733_at   | 1         | 0              | chrX:8651267-8699808 // 100.0 |
| 1633262_s_at | 1         | 1              | chrX:8699236-8699979 // 100.0 |

lola

|              | Ab.vs.FRT | AbSCRIB.vs.FRT | Alignments                     |
|--------------|-----------|----------------|--------------------------------|
| 1623411_at   | 0         | 0              | chr2R:6375366-6422583 // 100.0 |
| 1624729_at   | 0         | 0              | chr2R:6412903-6422583 // 100.0 |
| 1625768_s_at | 0         | 0              | chr2R:6407124-6430787 // 100.0 |
| 1627324_at   | 0         | 0              | chr2R:6389585-6422583 // 100.0 |
| 1628421_at   | 1         | 1              | chr2R:6383760-6384236 // 96.75 |
| 1628946_at   | 1         | 1              | chr2R:6403044-6422583 // 100.0 |
| 1629523_at   | 0         | 0              | chr2R:6409839-6422583 // 100.0 |
| 1630936_at   | 0         | 0              | chr2R:6414184-6422583 // 100.0 |
| 1633089_a_at | -1        | -1             | chr2R:6379446-6422582 // 100.0 |
| 1633422_a_at | -1        | -1             | chr2R:6395851-6430794 // 100.0 |
| 1634495_s_at | 0         | 0              | chr2R:6419508-6421862 // 100.0 |
| 1635096_at   | 1         | 1              | chr2R:6405425-6422583 // 100.0 |
| 1637581_at   | -1        | -1             | chr2R:6370444-6422583 // 100.0 |
| 1640280_at   | 0         | 0              | chr2R:6392363-6422583 // 100.0 |
| 1640945_at   | 0         | -1             | chr2R:6388140-6422583 // 100.0 |
| 1641609_at   | 0         | 0              | chr2R:6411001-6429162 // 100.0 |

mbl

|              | Ab.vs.FRT | AbSCRIB.vs.FRT | Alignments                       |
|--------------|-----------|----------------|----------------------------------|
| 1631120_at   | 0         | 0              | chr2R:13153057-13248991 // 100.0 |
| 1636099_s_at | 0         | 0              | chr2R:13238598-13263374 // 100.0 |
| 1639930_at   | 1         | 1              | chr2R:13153057-13186059 // 99.85 |
| 1640686_s_at | -1        | -1             | chr2R:13261444-13262572 // 50.0  |
| 1641114_at   | 1         | 1              | chr2R:13153057-13241068 // 100.0 |

MED9

|              | Ab.vs.FRT | AbSCRIB.vs.FRT | Alignments                       |
|--------------|-----------|----------------|----------------------------------|
| 1627646_at   | 1         | 1              | chr2R:14054781-14055885 // 100.0 |
| 1634176_a_at | 1         | 1              | chr2R:14054781-14055885 // 100.0 |

Mical

|              | Ab.vs.FRT | AbSCRIB.vs.FRT | Alignments                     |
|--------------|-----------|----------------|--------------------------------|
| 1623984_s_at | 0         | 1              | chr3R:5828032-5867720 // 99.68 |
| 1636412_at   | 1         | 0              | chr3R:5843964-5867720 // 98.93 |

mirr

|              | Ab.vs.FRT | AbSCRIB.vs.FRT | Alignments                       |
|--------------|-----------|----------------|----------------------------------|
| 1635669_a_at | 0         | -1             | chr3L:12686847-12702491 // 100.0 |
| 1639798_at   | 1         | 0              | chr3L:12686847-12703243 // 100.0 |

Mmp1

|              | Ab.vs.FRT | AbSCRIB.vs.FRT | Alignments                       |
|--------------|-----------|----------------|----------------------------------|
| 1623160_at   | 0         | 1              | chr2R:20558816-20574897 // 100.0 |
| 1625761_a_at | 0         | 1              | chr2R:20562188-20574897 // 100.0 |

1632204\_at 1 1 chr2R:20562188-20574897 // 100.0

mod(mdg4)

|              | Ab.vs.FRT | AbSCRIB.vs.FRT | Alignments                          |
|--------------|-----------|----------------|-------------------------------------|
| 1622976_at   | 0         | 0              | chr3R:17180941-17203121 // 100.0    |
| 1624020_at   | 0         | 0              | chr3R:17197044-17203121 // 100.0    |
| 1625283_at   | 0         | 0              | chr3R:17187909-17203121 // 100.0    |
| 1626650_at   | 1         | 1              | chr3R:17184011-17203121 // 100.0    |
| 1627483_at   | 0         | 0              | chr3R:17176748-17177077 // 100.0    |
| 1627603_at   | 0         | 0              | chr3R:17200781-17203121 // 82.21    |
| 1627953_at   | 1         | 1              | chr3R:17182071-17203121 // 100.0    |
| 1628562_s_at | 0         | 0              | chr3R:17186109-17187009 // 37.8 /// |
|              |           |                | chr3R:17200781-17203121 // 62.29    |
| 1628921_s_at | 0         | 0              | chr3R:17185909-17187851 // 100.0    |
| 1628932_at   | 0         | -1             | chr3R:17200781-17203121 // 66.62    |
| 1630536_at   | 0         | 0              | chr3R:17188688-17203121 // 100.0    |
| 1631500_at   | 0         | 0              | chr3R:17177330-17203121 // 100.0    |
| 1631742_s_at | 0         | 0              | chr3R:17180159-17203121 // 100.0    |
| 1631833_at   | 0         | 0              | chr3R:17190173-17203121 // 100.0    |
| 1632973_at   | 1         | 1              | chr3R:17183242-17203121 // 100.0    |
| 1633152_at   | 0         | 0              | chr3R:17177760-17203121 // 100.0    |
| 1634052_s_at | 0         | 0              | chr3R:17177760-17203121 // 100.0    |
| 1634258_at   | 0         | 0              | chr3R:17197884-17203121 // 100.0    |
| 1636471_at   | 0         | 0              | chr3R:17200781-17203121 // 80.27    |
| 1636765_at   | 0         | 0              | chr3R:17182776-17203121 // 100.0    |
| 1637723_at   | 0         | 0              | chr3R:17200780-17203121 // 80.61    |
| 1638041_at   | 0         | -1             | chr3R:17180159-17203121 // 100.0    |
| 1638829_s_at | 1         | 1              | chr3R:17184021-17203121 // 100.0    |
| 1639308_at   | 1         | 0              | chr3R:17178092-17203121 // 100.0    |
| 1640268_at   | 1         | 1              | chr3R:17195821-17203121 // 100.0    |
| 1640554_at   | 0         | 0              | chr3R:17179070-17203121 // 100.0    |

mRpS11

|              | Ab.vs.FRT | AbSCRIB.vs.FRT | Alignments                       |
|--------------|-----------|----------------|----------------------------------|
| 1625994_a_at | 1         | 1              | chr3R:12898452-12899531 // 100.0 |
| 1628902_at   | -1        | -1             | chr3R:12898452-12899531 // 100.0 |

mSl-3

|              | Ab.vs.FRT | AbSCRIB.vs.FRT | Alignments                     |
|--------------|-----------|----------------|--------------------------------|
| 1627738_a_at | -1        | -1             | chr3L:7116570-7118580 // 100.0 |
| 1630477_at   | 0         | 1              | chr3L:7116309-7118623 // 100.0 |

Msp-300

|              | Ab.vs.FRT | AbSCRIB.vs.FRT | Alignments                     |
|--------------|-----------|----------------|--------------------------------|
| 1625210_a_at | 0         | 1              | chr2L:5121290-5158264 // 100.0 |
| 1627250_at   | 0         | 1              | chr2L:5152119-5152283 // 96.47 |
| 1632945_at   | -1        | -1             | chr2L:5187675-5205389 // 100.0 |
| 1641672_at   | 0         | 0              | chr2L:5158457-5186211 // 99.98 |

|              |           |                |                                                                                                                                                          |
|--------------|-----------|----------------|----------------------------------------------------------------------------------------------------------------------------------------------------------|
| 1641717_s_at | -1        | 0              | chr2L:5109145-5111039 // 100.0                                                                                                                           |
| mthl4        |           |                |                                                                                                                                                          |
|              | Ab.vs.FRT | AbSCRIB.vs.FRT | Alignments                                                                                                                                               |
| 1627967_a_at | 1         | 1              | chrUextra:13596162-13596889 // 42.13 ///<br>chrUextra:13016046-13016713 // 38.25 ///<br>chr2R:13332990-13334733 // 100.0                                 |
| 1641282_at   | 1         | 1              | chrUextra:13596162-13596889 // 39.12 ///<br>chrUextra:13016046-13016713 // 35.52 ///<br>chr2R:13332810-13334733 // 100.0                                 |
| mthl8        |           |                |                                                                                                                                                          |
|              | Ab.vs.FRT | AbSCRIB.vs.FRT | Alignments                                                                                                                                               |
| 1629362_at   | 1         | 1              | chr3L:22946-26316 // 100.0                                                                                                                               |
| 1633386_s_at | 1         | 1              | chr3L:22946-23592 // 100.0                                                                                                                               |
| mud          |           |                |                                                                                                                                                          |
|              | Ab.vs.FRT | AbSCRIB.vs.FRT | Alignments                                                                                                                                               |
| 1624624_at   | 0         | 1              | chrX:14141875-14149287 // 99.97                                                                                                                          |
| 1626073_a_at | 0         | -1             | chrX:14141875-14149287 // 99.97                                                                                                                          |
| 1628717_a_at | 0         | 0              | chrX:14141875-14152263 // 99.97                                                                                                                          |
| Neu3         |           |                |                                                                                                                                                          |
|              | Ab.vs.FRT | AbSCRIB.vs.FRT | Alignments                                                                                                                                               |
| 1627649_at   | 1         | 1              | chr3R:10493568-10498427 // 100.0                                                                                                                         |
| 1635984_at   | -1        | -1             | chr3R:10491558-10493505 // 100.0                                                                                                                         |
| Nmnat        |           |                |                                                                                                                                                          |
|              | Ab.vs.FRT | AbSCRIB.vs.FRT | Alignments                                                                                                                                               |
| 1625565_at   | 1         | 1              | chr3R:20770958-20772555 // 100.0                                                                                                                         |
| 1627165_a_at | -1        | 0              | chr3R:20770958-20772555 // 100.0                                                                                                                         |
| 1635881_at   | 1         | 1              | chr3R:20770958-20773122 // 100.0                                                                                                                         |
| nod          |           |                |                                                                                                                                                          |
|              | Ab.vs.FRT | AbSCRIB.vs.FRT | Alignments                                                                                                                                               |
| 1626438_at   | 1         | 1              | chrX:11480262-11482941 // 100.0 ///<br>chrX:11484448-11487127 // 100.0 ///<br>chrX:11486541-11489220 // 100.0 ///<br>chrX:11488634-11493406 // 100.0 /// |
| 1639689_at   | 0         | -1             | chrX:11478884-11480848 // 96.44<br>chrX:11474850-11479787 // 100.0                                                                                       |
| norpA        |           |                |                                                                                                                                                          |
|              | Ab.vs.FRT | AbSCRIB.vs.FRT | Alignments                                                                                                                                               |
| 1630119_s_at | 1         | 1              | chrX:4257042-4258910 // 100.0                                                                                                                            |

|              |   |   |                               |
|--------------|---|---|-------------------------------|
| 1636576_s_at | 1 | 1 | chrX:4216658-4256487 // 100.0 |
|--------------|---|---|-------------------------------|

#### oaf

|              | Ab.vs.FRT | AbSCRIB.vs.FRT | Alignments                     |
|--------------|-----------|----------------|--------------------------------|
| 1624913_s_at | -1        | -1             | chr2L:2492954-2497357 // 100.0 |
| 1626218_s_at | -1        | -1             | chr2L:2492954-2498234 // 100.0 |
| 1627494_s_at | 0         | 0              | chr2L:2492954-2498846 // 100.0 |

#### obst-E

|            | Ab.vs.FRT | AbSCRIB.vs.FRT | Alignments                     |
|------------|-----------|----------------|--------------------------------|
| 1628498_at | 0         | 1              | chr2L:5762673-5766141 // 100.0 |
| 1638612_at | 0         | 1              | chr2L:5763459-5766141 // 100.0 |

#### olf186-F

|              | Ab.vs.FRT | AbSCRIB.vs.FRT | Alignments                       |
|--------------|-----------|----------------|----------------------------------|
| 1625514_s_at | 0         | 1              | chr2R:13730949-13748075 // 100.0 |
| 1637534_at   | 1         | 1              | chr2R:13738383-13743293 // 100.0 |

#### Pabp2

|              | Ab.vs.FRT | AbSCRIB.vs.FRT | Alignments                     |
|--------------|-----------|----------------|--------------------------------|
| 1629694_at   | 1         | 1              | chr2R:4018917-4020985 // 100.0 |
| 1631244_a_at | 0         | -1             | chr2R:4018917-4020985 // 100.0 |
| 1639719_at   | 1         | 0              | chr2R:4018917-4021879 // 100.0 |

#### par-1

|              | Ab.vs.FRT | AbSCRIB.vs.FRT | Alignments                       |
|--------------|-----------|----------------|----------------------------------|
| 1625544_s_at | 0         | 0              | chr2R:15371296-15371608 // 100.0 |
| 1625561_s_at | 0         | 0              | chr2R:15350488-15370547 // 100.0 |
| 1627121_s_at | 0         | 1              | chr2R:15349952-15353274 // 100.0 |
| 1628849_at   | 1         | 1              | chr2R:15347437-15350136 // 100.0 |

#### PhKgamma

|              | Ab.vs.FRT | AbSCRIB.vs.FRT | Alignments                      |
|--------------|-----------|----------------|---------------------------------|
| 1623842_a_at | -1        | -1             | chrX:11589185-11597790 // 99.84 |
| 1624139_at   | 0         | 0              | chrX:11589166-11598444 // 100.0 |
| 1632955_at   | 1         | 0              | chrX:11589163-11597778 // 100.0 |

#### Pis

|              | Ab.vs.FRT | AbSCRIB.vs.FRT | Alignments                      |
|--------------|-----------|----------------|---------------------------------|
| 1625595_a_at | -1        | -1             | chrX:15596545-15597798 // 100.0 |
| 1627102_at   | 0         | 1              | chrX:15595477-15597798 // 100.0 |
| 1636027_at   | 0         | 0              | chrX:15596545-15597798 // 100.0 |

#### PNUTS

|              | Ab.vs.FRT | AbSCRIB.vs.FRT | Alignments                   |
|--------------|-----------|----------------|------------------------------|
| 1623583_at   | -1        | 0              | chr2L:875037-877041 // 98.67 |
| 1633750_s_at | 1         | 1              | chr2L:870463-874149 // 99.85 |

ps

|              | Ab.vs.FRT | AbSCRIB.vs.FRT | Alignments                     |
|--------------|-----------|----------------|--------------------------------|
| 1625967_s_at | 1         | 1              | chr3R:5243663-5258261 // 100.0 |
| 1633612_at   | 1         | 1              | chr3R:5259987-5272628 // 100.0 |
| 1635728_a_at | 1         | 1              | chr3R:5258323-5273597 // 100.0 |

Ptp4E

|              | Ab.vs.FRT | AbSCRIB.vs.FRT | Alignments                    |
|--------------|-----------|----------------|-------------------------------|
| 1627599_at   | 1         | 1              | chrX:4833164-4848123 // 99.74 |
| 1631741_a_at | 0         | 1              | chrX:4833164-4848123 // 99.74 |
| 1637627_at   | 1         | 1              | chrX:4833164-4849458 // 100.0 |

pyd

|              | Ab.vs.FRT | AbSCRIB.vs.FRT | Alignments                     |
|--------------|-----------|----------------|--------------------------------|
| 1627360_at   | 0         | 0              | chr3R:4658908-4672009 // 100.0 |
| 1630791_a_at | -1        | -1             | chr3R:4658908-4672009 // 100.0 |
| 1631905_a_at | -1        | -1             | chr3R:4661310-4756978 // 99.74 |
| 1637322_at   | 0         | 0              | chr3R:4661310-4756978 // 99.74 |
| 1637428_a_at | 0         | 0              | chr3R:4653199-4672010 // 100.0 |

RFesP

|              | Ab.vs.FRT | AbSCRIB.vs.FRT | Alignments                     |
|--------------|-----------|----------------|--------------------------------|
| 1631856_a_at | -1        | -1             | chr2L:1612685-1614182 // 100.0 |
| 1641174_at   | 0         | 1              | chr2L:1612685-1614182 // 100.0 |

rho-4

|              | Ab.vs.FRT | AbSCRIB.vs.FRT | Alignments                                                                                                                                                                                                                                                      |
|--------------|-----------|----------------|-----------------------------------------------------------------------------------------------------------------------------------------------------------------------------------------------------------------------------------------------------------------|
| 1623158_s_at | 1         | 1              | chr3RHet:378289-378693 // 94.39 ///<br>chrU:518982-622483 // 96.1 ///<br>chrX:11499722-11500110 // 90.24 ///<br>chr3RHet:818221-819725 // 91.95 ///<br>chr3RHet:212884-576594 // 92.44 ///<br>chrU:3409251-3409650 // 92.2 ///<br>chrU:1497764-1918534 // 90.98 |
| 1623692_s_at | 0         | 0              | chrX:11493873-11500034 // 100.0                                                                                                                                                                                                                                 |
| 1632924_at   | 1         | 1              | chr3RHet:378289-378693 // 94.39 ///<br>chrX:11499722-11500110 // 90.24 ///<br>chrU:518982-622483 // 96.1 ///<br>chr3RHet:818221-819725 // 91.95 ///<br>chr3RHet:212884-576594 // 92.44 ///<br>chrU:3409251-3409650 // 92.2 ///<br>chrU:1497764-1918534 // 90.98 |



1623158\_s\_at  
1623692\_s\_at  
1632924\_at

### RhoGAP71E

|              | Ab.vs.FRT | AbSCRIB.vs.FRT | Alignments                       |
|--------------|-----------|----------------|----------------------------------|
| 1637051_at   | -1        | -1             | chr3L:15581979-15596237 // 100.0 |
| 1640295_a_at | 1         | 1              | chr3L:15581979-15596172 // 100.0 |

### RpL3

|              | Ab.vs.FRT | AbSCRIB.vs.FRT | Alignments                     |
|--------------|-----------|----------------|--------------------------------|
| 1625889_at   | -1        | -1             | chr3R:7047890-7049171 // 100.0 |
| 1630270_s_at | 0         | 0              | chr3R:7047617-7050897 // 100.0 |
| 1634685_at   | -1        | -1             | chr3R:7047617-7048738 // 100.0 |

### RpL35

|              | Ab.vs.FRT | AbSCRIB.vs.FRT | Alignments                    |
|--------------|-----------|----------------|-------------------------------|
| 1626209_a_at | 0         | 0              | chrX:5566474-5567589 // 100.0 |
| 1627206_at   | 0         | 1              | chrX:5566690-5567589 // 100.0 |
| 1635917_at   | 1         | 1              | chrX:5566474-5567589 // 100.0 |

### sbb

|            | Ab.vs.FRT | AbSCRIB.vs.FRT | Alignments                       |
|------------|-----------|----------------|----------------------------------|
| 1624001_at | 1         | 0              | chr2R:14177077-14177347 // 100.0 |
| 1635211_at | -1        | -1             | chr2R:14166484-14176255 // 100.0 |

### Sh

|              | Ab.vs.FRT | AbSCRIB.vs.FRT | Alignments                      |
|--------------|-----------|----------------|---------------------------------|
| 1623917_a_at | 1         | 0              | chrX:17833763-17933532 // 100.0 |
| 1623933_at   | 1         | 0              | chrX:17844011-17909268 // 100.0 |
| 1626802_a_at | 1         | 0              | chrX:17844011-17909268 // 100.0 |
| 1641501_a_at | 1         | 0              | chrX:17823291-17909268 // 100.0 |

### SK

|              | Ab.vs.FRT | AbSCRIB.vs.FRT | Alignments                    |
|--------------|-----------|----------------|-------------------------------|
| 1625065_s_at | 1         | 1              | chrX:5234270-5295175 // 100.0 |
| 1627752_s_at | 1         | 1              | chrX:5234270-5291171 // 100.0 |
| 1635657_s_at | 0         | 0              | chrX:5235489-5247049 // 100.0 |

### sno

|            | Ab.vs.FRT | AbSCRIB.vs.FRT | Alignments                      |
|------------|-----------|----------------|---------------------------------|
| 1625819_at | 1         | 1              | chrX:13089528-13105454 // 100.0 |
| 1635992_at | -1        | -1             | chrX:13097202-13105699 // 100.0 |

### SP1070

|              |           |                |                                  |
|--------------|-----------|----------------|----------------------------------|
|              | Ab.vs.FRT | AbSCRIB.vs.FRT | Alignments                       |
| 1623259_at   | 1         | 1              | chr2L:6984735-7004375 // 96.77   |
| 1638227_at   | -1        | -1             | chr2L:6973529-6985013 // 100.0   |
| spas         |           |                |                                  |
|              | Ab.vs.FRT | AbSCRIB.vs.FRT | Alignments                       |
| 1628019_a_at | -1        | -1             | chr3R:19863939-19867573 // 100.0 |
| 1629123_at   | 0         | 1              | chr3R:19863939-19868376 // 100.0 |
| spir         |           |                |                                  |
|              | Ab.vs.FRT | AbSCRIB.vs.FRT | Alignments                       |
| 1631571_a_at | 0         | 0              | chr2L:20311236-20344970 // 100.0 |
| 1635630_a_at | -1        | 0              | chr2L:20311218-20348395 // 100.0 |
| 1637962_at   | 1         | 1              | chr2L:20311236-20344970 // 100.0 |
| Spn          |           |                |                                  |
|              | Ab.vs.FRT | AbSCRIB.vs.FRT | Alignments                       |
| 1630417_at   | 0         | -1             | chr3L:2508119-2554277 // 100.0   |
| 1633021_s_at | 1         | 0              | chr3L:2541144-2554277 // 100.0   |
| spri         |           |                |                                  |
|              | Ab.vs.FRT | AbSCRIB.vs.FRT | Alignments                       |
| 1626771_at   | 0         | 0              | chrX:10386494-10387770 // 100.0  |
| 1627037_s_at | -1        | -1             | chrX:10390753-10404675 // 100.0  |
| 1629648_s_at | -1        | -1             | chrX:10384499-10440769 // 100.0  |
| 1631646_at   | 0         | 0              | chrX:10469418-10470210 // 100.0  |
| ssp2         |           |                |                                  |
|              | Ab.vs.FRT | AbSCRIB.vs.FRT | Alignments                       |
| 1632670_at   | -1        | 0              | chr3L:13958328-13965120 // 100.0 |
| 1634047_a_at | -1        | -1             | chr3L:13958304-13959026 // 100.0 |
| Suchb        |           |                |                                  |
|              | Ab.vs.FRT | AbSCRIB.vs.FRT | Alignments                       |
| 1626745_at   | 0         | -1             | chr3L:5554788-5556784 // 100.0   |
| 1635682_at   | 0         | 0              | chr3L:5556037-5556784 // 100.0   |
| 1637251_a_at | -1        | -1             | chr3L:5556037-5556784 // 100.0   |
| svp          |           |                |                                  |
|              | Ab.vs.FRT | AbSCRIB.vs.FRT | Alignments                       |
| 1626594_s_at | 1         | 1              | chr3R:8126904-8127572 // 100.0   |
| 1628779_a_at | 0         | -1             | chr3R:8084470-8128509 // 100.0   |
| 1635192_at   | 0         | 0              | chr3R:8106831-8121860 // 100.0   |

|              |           |                |                                  |
|--------------|-----------|----------------|----------------------------------|
| Timp         |           |                |                                  |
|              | Ab.vs.FRT | AbSCRIB.vs.FRT | Alignments                       |
| 1632533_at   | 1         | 1              | chr3R:6029589-6038710 // 100.0   |
| 1641476_a_at | 1         | 1              | chr3R:6029615-6038710 // 100.0   |
| tinc         |           |                |                                  |
|              | Ab.vs.FRT | AbSCRIB.vs.FRT | Alignments                       |
| 1632529_at   | 1         | 1              | chr3R:13678095-13693223 // 99.65 |
| 1636047_s_at | 1         | 0              | chr3R:13678095-13693223 // 99.65 |
| 1637201_s_at | -1        | -1             | chr3R:13678095-13696493 // 100.0 |
| 1641243_at   | 1         | 1              | chr3R:13673047-13677925 // 100.0 |
| Tl           |           |                |                                  |
|              | Ab.vs.FRT | AbSCRIB.vs.FRT | Alignments                       |
| 1624769_s_at | 0         | 1              | chr3R:22624764-22653391 // 100.0 |
| 1639321_s_at | 0         | -1             | chr3R:22624764-22668125 // 100.0 |
| tmod         |           |                |                                  |
|              | Ab.vs.FRT | AbSCRIB.vs.FRT | Alignments                       |
| 1626016_s_at | -1        | -1             | chr3R:26358335-26404627 // 100.0 |
| 1639114_at   | -1        | -1             | chr3R:26400018-26400567 // 100.0 |
| toy          |           |                |                                  |
|              | Ab.vs.FRT | AbSCRIB.vs.FRT | Alignments                       |
| 1623314_at   | 0         | 0              | chr4:1010353-1019500 // 100.0    |
| 1633094_a_at | 0         | -1             | chr4:1010353-1019500 // 100.0    |
| 1633512_at   | 0         | -1             | chr4:1010353-1027011 // 100.0    |
| Trc8         |           |                |                                  |
|              | Ab.vs.FRT | AbSCRIB.vs.FRT | Alignments                       |
| 1632303_a_at | -1        | -1             | chr3R:25324887-25329519 // 100.0 |
| 1639025_at   | -1        | -1             | chr3R:25324565-25329519 // 99.9  |
| Trl          |           |                |                                  |
|              | Ab.vs.FRT | AbSCRIB.vs.FRT | Alignments                       |
| 1628275_at   | 0         | -1             | chr3L:14741028-14750430 // 100.0 |
| 1629754_s_at | 0         | 0              | chr3L:14745933-14751041 // 99.54 |
| 1635305_s_at | -1        | -1             | chr3L:14743341-14750982 // 100.0 |
| trol         |           |                |                                  |
|              | Ab.vs.FRT | AbSCRIB.vs.FRT | Alignments                       |
| 1625116_at   | 0         | 0              | chrX:2374590-2399583 // 100.0    |
| 1640189_at   | 0         | 0              | chrX:2415552-2418402 // 100.0    |
| 1640223_a_at | -1        | -1             | chrX:2374590-2399583 // 100.0    |
| 1641442_a_at | 0         | 1              | chrX:2365015-2399583 // 100.0    |

|                 |                  |                       |                                  |
|-----------------|------------------|-----------------------|----------------------------------|
| <b>Tsp</b>      |                  |                       |                                  |
|                 | <b>Ab.vs.FRT</b> | <b>AbSCRIB.vs.FRT</b> | <b>Alignments</b>                |
| 1636251_at      | 1                | 0                     | chr2L:6686818-6709080 // 100.0   |
| 1641490_s_at    | 1                | 1                     | chr2L:6689617-6709085 // 100.0   |
| <br>            |                  |                       |                                  |
| <b>tutl</b>     |                  |                       |                                  |
|                 | <b>Ab.vs.FRT</b> | <b>AbSCRIB.vs.FRT</b> | <b>Alignments</b>                |
| 1627602_at      | 1                | 1                     | chr2L:4283150-4318712 // 100.0   |
| 1636076_a_at    | 1                | 0                     | chr2L:4283150-4318638 // 100.0   |
| 1637631_at      | 0                | -1                    | chr2L:4283150-4316071 // 100.0   |
| 1639004_at      | 0                | 0                     | chr2L:4283150-4305695 // 99.36   |
| 1641128_a_at    | 0                | 0                     | chr2L:4283150-4305695 // 99.36   |
| <br>            |                  |                       |                                  |
| <b>Usf</b>      |                  |                       |                                  |
|                 | <b>Ab.vs.FRT</b> | <b>AbSCRIB.vs.FRT</b> | <b>Alignments</b>                |
| 1626375_a_at    | 0                | -1                    | chrX:4440552-4443291 // 100.0    |
| 1639393_at      | 0                | 1                     | chrX:4440552-4443291 // 100.0    |
| <br>            |                  |                       |                                  |
| <b>yemalpha</b> |                  |                       |                                  |
|                 | <b>Ab.vs.FRT</b> | <b>AbSCRIB.vs.FRT</b> | <b>Alignments</b>                |
| 1629017_s_at    | -1               | -1                    | chr3R:24944306-24944537 // 100.0 |
| 1634784_at      | -1               | -1                    | chr3R:24944051-24948597 // 99.91 |
| <br>            |                  |                       |                                  |
| <b>yuri</b>     |                  |                       |                                  |
|                 | <b>Ab.vs.FRT</b> | <b>AbSCRIB.vs.FRT</b> | <b>Alignments</b>                |
| 1636288_at      | 1                | 1                     | chr2L:15257336-15264690 // 100.0 |
| 1638821_a_at    | 1                | 0                     | chr2L:15261205-15264690 // 100.0 |
| <br>            |                  |                       |                                  |
| <b>zormin</b>   |                  |                       |                                  |
|                 | <b>Ab.vs.FRT</b> | <b>AbSCRIB.vs.FRT</b> | <b>Alignments</b>                |
| 1623197_a_at    | 0                | 0                     | chr3L:2122618-2126614 // 100.0   |
| 1626603_at      | -1               | -1                    | chr3L:2149711-2150089 // 100.0   |
| 1627379_at      | 0                | 0                     | chr3L:2139571-2142104 // 100.0   |
| 1628799_at      | 0                | 0                     | chr3L:2137174-2138470 // 100.0   |
| 1636349_at      | 0                | 0                     | chr3L:2126924-2128622 // 100.0   |
| 1636934_at      | 0                | 1                     | chr3L:2118537-2119187 // 100.0   |
| 1640817_at      | 1                | 1                     | chr3L:2128800-2136057 // 100.0   |
